# Supplementary material
Source: PubMed Central journal article supplement (PMC4468409)
Supplement: ml5b00121_si_001.pdf [file ml5b00121_si_001.pdf]

## Supporting Information

### **Structure-activity relationship studies of 3-*epi*-deoxynegamycin derivatives as potent readthrough drug candidates**

Keisuke Hamada, Akihiro Taguchi, Masaya Kotake, Suguru Aita, Saori Murakami, Kentaro Takayama, Fumika Yakushiji, and Yoshio Hayashi\*

Department of Medicinal Chemistry, School of Pharmacy, Tokyo University of Pharmacy and Life Science, 1432-1, Horinouchi, Hachioji, Tokyo, 192-0392, Japan.

\*Corresponding author; Yoshio Hayashi, E-mail; [yhayashi@toyaku.ac.jp](mailto:yhayashi@toyaku.ac.jp). Phone: +81-42-676-3275. Fax: +81-676-4475.

| Table of Contents                                                                           | Page |
|---------------------------------------------------------------------------------------------|------|
| 1. General information                                                                      | 3    |
| 2. Synthesis of derivatives <b>9a-c</b>                                                     | 4    |
| 3. Synthesis of derivatives <b>12a-d</b>                                                    | 9    |
| 4. Synthesis of derivatives <b>15a-d</b>                                                    | 13   |
| 5. Synthesis of derivatives <b>17a-l</b>                                                    | 17   |
| 6. Biological evaluation                                                                    | 29   |
| 6-1. Chemicals                                                                              | 29   |
| 6-2. Plasmid                                                                                | 29   |
| 6-3. The cell-based readthrough activity evaluation                                         | 29   |
| 6-4. The readthrough activity evaluation of eukaryote<br>cell-free protein synthesis system | 30   |
| 6-5. The antimicrobial activity assay (MIC assay)                                           | 30   |
| 6-6. Hydrolysis of benzyl ester derivative <b>17e</b> by porcine liver esterase             | 30   |
| 7. $^1\text{H}$ and $^{13}\text{C}$ NMR spectra                                             | 31   |
| 8. References                                                                               | 63   |

## 1. General information

All reaction mixtures were stirred magnetically.  $^1\text{H}$  NMR spectra were measured in  $\text{CDCl}_3$  and  $\text{D}_2\text{O}$  solutions, and referenced to TMS (0.00 ppm) and  $\text{D}_2\text{O}$  (4.79 ppm) using Bruker AVANCE-III (400 MHz), Bruker DPX-400 NMR Spectrometer (400 MHz) and Varian Mercury-300 NMR (300 MHz) spectrophotometers.  $^{13}\text{C}$  NMR spectra were measured in  $\text{CDCl}_3$  and  $\text{D}_2\text{O}$  solutions, and referenced to  $\text{CDCl}_3$  (77.05 ppm) using Bruker AVANCE-III (400 MHz) and Bruker DPX-400 NMR (400 MHz) spectrophotometers. When peak multiplicities are reported, the following abbreviations are used: s, singlet; d, doublet; t, triplet; q, quartet; m, multiplet; br s, broad singlet; br d, broad doublet. Melting points were measured with Yanaco MP-500D melting point apparatuses. Mass spectra were obtained on Waters MICRO MASS LCT-premier. Optical rotations were measured with a JASCO Polarimeter P-1030 at the sodium-D line (589 nm) at the concentrations ( $c$ , g 100 mL $^{-1}$ ). The measurements were carried out between 24-25 °C in a cell with path length ( $l$ ) of 1 dm. Specific rotations  $[\alpha]_D$  are given in 10 $^{-1}$  deg cm $^2$  g $^{-1}$ . Column chromatography was performed on silicagel 60N (spherical, neutral) (4-50  $\mu\text{m}$  or 63-210  $\mu\text{m}$ ), thin layer chromatography (TLC) was performed on precoated plates (0.25 mm, silica gel Merk Kieselgel 60F $_{254}$ ), and compounds were visualized with UV light, phosphomolybdic acid stain, and ninhydrin stain. Preparative HPLC was performed using a C18 reversed-phase column (250 x 20 mm; YMC-Pack ODS-AM) with a binary solvent system. Analytical HPLC was performed using a C18 reversed-phase column (COSMOSIL Packed Column, Protein-R, 4.6ID x 150 mm) with a binary solvent system. Solvents and reagents were purchased from Kanto Chemical Co., Inc., Kokusan Chemical Co., Ltd., Wako Pure Chemical Industries, Ltd., and Watanabe Chemical Industries, Ltd.

## 2. Synthesis of derivatives 9a-c

The derivatives **9a-c** were synthesized by previously reported synthetic procedure of 3-*epi*-deoxynegamycin (**2**)<sup>1</sup>.

### (*S*)-2,6-bis(*tert*-Butoxycarbonylamino)hexylmethanesulfonate (**5a**)

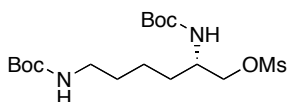

*N*-methylmorpholine (140  $\mu$ L, 1.25 mmol) and isobutylchloroformate (165  $\mu$ L, 1.25 mmol) were added to a solution of Boc-Lys(Boc)-OH·DCHA **4a** (600 mg 1.14 mmol) in THF (1.5 mL) at  $-15$   $^{\circ}$ C. The reaction mixture was then stirred at  $-15$   $^{\circ}$ C. After stirring for 10 min at this temperature, the mixture was filtration and the cake was washed with THF. NaBH<sub>4</sub> (65 mg, 1.71 mmol) in H<sub>2</sub>O (1 mL) was added to a solution of the intermediate in THF at  $-15$   $^{\circ}$ C. After stirring for 10 min at this temperature, the mixture was added to 1 M HCl at  $-15$   $^{\circ}$ C and extracted with AcOEt. The extracts were washed with brine, dried over Na<sub>2</sub>SO<sub>4</sub>, filtered, and concentrated under reduced pressure. The residue was used in the next step without further purification. Et<sub>3</sub>N (237  $\mu$ L, 1.71 mmol) and MsCl (264  $\mu$ L, 3.42 mmol) were added to a solution of above residue in CH<sub>2</sub>Cl<sub>2</sub> (7.5 mL) at 0  $^{\circ}$ C. After stirring for overnight at room temperature, the mixture was added H<sub>2</sub>O at 0  $^{\circ}$ C and extracted with CHCl<sub>3</sub>. The extracts were washed with brine, dried over Na<sub>2</sub>SO<sub>4</sub>, filtered and concentrated under reduced pressure. The residue was purified by silica gel flash column chromatography with CHCl<sub>3</sub>/MeOH (100 : 1) to give **5a** (270 mg, 0.658 mmol, 2 steps 58%) as a white solid;  $[\alpha]_D^{25} = -11.2$  (*c* 2.07, MeOH); m.p. 83.6-85.4  $^{\circ}$ C; <sup>1</sup>H NMR (400 MHz, CDCl<sub>3</sub>)  $\delta$  4.89-4.73 (br d, 1H), 4.64 (br s, 1H), 4.34-4.22 (m, 1H), 4.18 (dd, *J* = 10 and 4.2 Hz, 1H), 3.81 (br s, 1H), 3.12 (br s, 2H), 3.04 (s, 3H), 1.64-1.34 (m, 24H); <sup>13</sup>C NMR (100 MHz, CDCl<sub>3</sub>)  $\delta$  156.1, 155.4, 79.8, 79.1, 71.1, 49.6, 39.9, 37.3, 30.6, 29.7, 28.4 (3 carbons), 28.3 (3 carbons), 22.8; HRMS (ES+) calcd for C<sub>17</sub>H<sub>34</sub>N<sub>2</sub>O<sub>7</sub>SNa [M+Na]<sup>+</sup> 433.1984 found 433.1991.

### (*S*)-2,4-bis(*tert*-Butoxycarbonylamino)butylmethanesulfonate (**5b**)

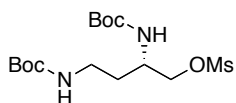

**5b** was prepared in the same manner as described for compound **5a** using Boc-Dab(Boc)-OH **4b** (10.0 g, 31.4 mmol).

**5b** (7.97 g, 20.9 mmol, 2 steps 66%) was obtained as a colorless oil;  $[\alpha]_D^{25} = -38.1$  (*c* 1.97, CHCl<sub>3</sub>); <sup>1</sup>H NMR (400 MHz, CDCl<sub>3</sub>) δ 5.07 (br s, 1H), 5.03-4.78 (br d, 1H), 4.30 (dd, *J* = 10 and 3.5 Hz, 1H), 4.23 (dd, *J* = 10 and 4.4 Hz, 1H), 4.01-3.88 (m, 1H), 3.38 (br s, 1H), 3.12-2.94 (m, 4H), 1.87-1.55 (m, 2H), 1.44 (s, 18H); <sup>13</sup>C NMR (100 MHz, CDCl<sub>3</sub>) δ 156.0, 155.7, 80.1, 79.4, 71.4, 47.3, 37.3, 36.9, 31.9, 28.4 (3 carbons), 28.3 (3 carbons); HRMS (ES+) calcd for C<sub>15</sub>H<sub>30</sub>N<sub>2</sub>O<sub>7</sub>SNa [M+Na]<sup>+</sup> 405.1671, found 405.1671.

**(S)-2,3-bis(tert-Butoxycarbonylamino)propylmethanesulfonate (5c)**

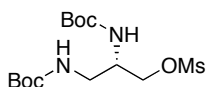

**5c** was prepared in the same manner as described for compound **5a** using Boc-Dap(Boc)-OH **4c** (383 mg, 1.26 mmol).

**5c** (270 mg, 0.733 mmol, 2 steps 58%) was obtained as a white powder;  $[\alpha]_D^{25} = -4.74$  (*c* 0.27, MeOH); m.p. 90.8-92.1 °C; <sup>1</sup>H NMR (400 MHz, CDCl<sub>3</sub>) δ 5.46-5.26 (br d, 1H) 4.99 (br s, 1H), 4.34-4.17 (m, 2H), 4.02-3.83 (m, 1H), 3.33 (t, *J* = 6.1 Hz, 2H), 3.06 (s, 3H), 1.44 (s, 18H); <sup>13</sup>C NMR (100 MHz, CDCl<sub>3</sub>) δ 156.9, 155.6, 80.1 (2 carbons), 68.5, 50.6, 40.8, 37.4, 28.3 (6 carbons); HRMS (ES+) calcd for C<sub>14</sub>H<sub>28</sub>N<sub>2</sub>O<sub>7</sub>SNa [M+Na]<sup>+</sup> 391.1515, found 391.1512.

**(S)-tert-Butyl 6-cyanoheptane-1,5-diylidicarbamate (6a)**

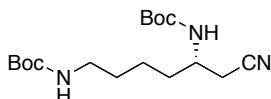

18-Crown-6-ether (860 mg, 3.25 mmol) and KCN (353 mg, 5.42 mmol) were added to a solution of **5a** (198 mg, 0.499 mmol) in DMF (14 mL) at room temperature. After stirring for 2 h at 100 °C, the mixture was cooled to room temperature, a saturated aqueous NaHCO<sub>3</sub> solution was added at 0 °C and extracted with AcOEt. The extracts were washed with brine, dried over Na<sub>2</sub>SO<sub>4</sub>, filtered and concentrated under reduced pressure. The residue was purified by silica gel flash column chromatography with hexane/AcOEt (2 : 1) to give **6a** (475 mg, 1.39 mmol, 51%) as a white solid;  $[\alpha]_D^{25} = -43.5$  (*c* 0.53, CHCl<sub>3</sub>); m.p. 79.0-79.8 °C; <sup>1</sup>H NMR (400 MHz, CDCl<sub>3</sub>) δ 4.93-4.77 (br d, 1H), 4.60 (br s, 1H), 3.89-3.68 (m, 1H), 3.23-3.03 (m, 2H), 2.72 (dd, *J* = 17 and 5.5 Hz, 1H), 2.56 (dd, *J* = 17 and 3.6 Hz, 1H), 1.83-1.32 (m, 24H); <sup>13</sup>C NMR (100 MHz, CDCl<sub>3</sub>) δ 156.2, 155.2, 117.4, 80.1, 79.2, 47.2, 39.8, 32.9, 29.8, 28.4 (3 carbons), 28.3

(3 carbons), 23.8, 22.8; HRMS (ES+) calcd for  $C_{17}H_{31}N_3O_4Na$   $[M+Na]^+$  364.2212, found 364.2216.

**(S)-tert-Butyl 4-cyanobutane-1,3-diylldicarbamate (6b)**

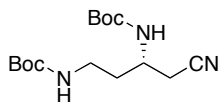

**6b** was prepared by stirring a solution of **5b** (7.97 g, 20.9 mmol) in acetonitrile (105 mL) for overnight at 40 °C using the same reagents as described for compound **6a**.

**6b** (4.08 g, 13.0 mmol, 62%) was obtained as a white powder;  $[\alpha]_D^{25} = -64.1$  ( $c$  1.14,  $CHCl_3$ ); m.p. 84.7-85.6 °C;  $^1H$  NMR (400 MHz,  $CDCl_3$ )  $\delta$  5.03-4.72 (m, 2H), 4.00-3.83 (m, 1H), 3.48-3.26 (m, 1H), 3.16-2.97 (m, 1H), 2.74 (dd,  $J = 17$  and 5.4 Hz, 1H), 2.62 (dd,  $J = 17$  and 4.6 Hz, 1H), 1.90-1.67 (m, 2H), 1.45 (s, 9H), 1.44 (s, 9H);  $^{13}C$  NMR (100 MHz,  $CDCl_3$ )  $\delta$  156.0, 155.3, 117.2, 80.4, 79.6, 45.0, 36.9, 34.3, 28.4 (3 carbons), 28.3 (3 carbons), 23.9; HRMS (ES+) calcd for  $C_{15}H_{27}N_3O_4Na$   $[M+Na]^+$  336.1899, found 336.1896.

**(S)-tert-Butyl 3-cyanopropane-1,2-diylldicarbamate (6c)**

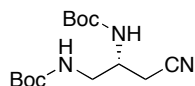

**6c** was prepared by stirring a solution of **5c** (205 mg, 0.557 mmol) in acetonitrile (3 mL) for 3 h under reflux using the same reagents as described for compound **6a**.

**6c** (100 mg, 0.334 mmol, 60%) was obtained as a white powder;  $[\alpha]_D^{25} = -31.1$  ( $c$  0.63,  $CHCl_3$ ); m.p. 120.4-120.9 °C;  $^1H$  NMR (400 MHz,  $CDCl_3$ )  $\delta$  5.63-5.36 (br d, 1H), 4.94 (br s, 1H), 4.00-3.83 (m, 1H), 3.50-3.22 (m, 2H), 2.77-2.51 (m, 2H), 1.44 (s, 18H);  $^{13}C$  NMR (100 MHz,  $CDCl_3$ )  $\delta$  157.0, 155.4, 117.1, 80.4, 80.2, 48.8, 43.0, 28.31 (3 carbons), 28.29 (3 carbons), 21.2; HRMS (ES+) calcd for  $C_{14}H_{25}N_3O_4Na$   $[M+Na]^+$  322.1743, found 322.1738.

**(S)-tert-Butyl 2-{2-[3,7-bis(tert-butoxycarbonylamino)heptanoyl]-1-methylhydrazinyl}acetate (8a)**

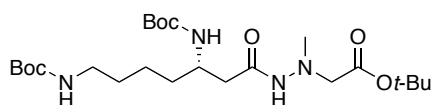

KOH (124 mg, 2.20 mmol) was added to a solution of **6a** (75.4 mg, 0.221 mmol) in EtOH/H<sub>2</sub>O (2 : 1, 2 mL) at room temperature. After stirring for overnight at 80 °C, the mixture was removed under reduced pressure. The resulting aqueous phase was acidified to pH 1 upon the addition of 1 M HCl at 0 °C and extracted with AcOEt. The extracts were washed with brine, dried over Na<sub>2</sub>SO<sub>4</sub>, filtered and concentrated under reduced pressure. The residue was used in the next step without further purification. PTSA·H<sub>2</sub>NN(Me)CH<sub>2</sub>CO<sub>2</sub>*t*-Bu **7** (147 mg, 0.442 mmol) and HOBt·H<sub>2</sub>O (67.7 mg, 0.442 mmol) were added to a solution containing above residue in DMF (2 mL) at room temperature. Et<sub>3</sub>N (61.3 μL, 0.442 mmol) and EDC·HCl (84.7 mg, 0.442 mmol) were added to the mixture at 0 °C. After stirring for overnight at room temperature, the mixture was poured into 10% citric acid aqueous solution and extracted with AcOEt. The extracts were washed with saturated aqueous NaHCO<sub>3</sub> solution, H<sub>2</sub>O, brine, dried over Na<sub>2</sub>SO<sub>4</sub>, filtered and concentrated under reduced pressure. The residue was purified by silica gel flash column chromatography with CHCl<sub>3</sub>/MeOH (100 : 1) to give **8a** (42.0 mg, 83.6 μmol, 2 steps 38%) as a white solid; [α]<sub>D</sub><sup>25</sup> = -12.4 (*c* 0.56, CHCl<sub>3</sub>); m.p. 86.5-87.3 °C; <sup>1</sup>H NMR (400 MHz, CDCl<sub>3</sub>) δ 7.90 (s) and 7.44-7.31 (br d, total 1H), 5.49-5.17 (m, 1H), 4.75-4.52 (br s, 1H), 3.98-3.77 (m, 1H), 3.67-3.33 (m, 2H), 3.20-3.03 (m, 2H), 2.88-2.48 (m, 4H), 2.42-2.21 (m, 1H), 1.88-1.20 (m, 33H); <sup>13</sup>C NMR (100 MHz, CDCl<sub>3</sub>) δ 170.3, 169.1, 156.1, 155.7, 82.4, 79.2, 79.0, 58.3, 47.7, 43.9, 40.3, 39.4, 34.4, 29.6, 28.4 (6 carbons), 28.2 (3 carbons), 23.3; HRMS (ES<sup>+</sup>) calcd for C<sub>24</sub>H<sub>46</sub>N<sub>4</sub>O<sub>7</sub>Na [M+Na]<sup>+</sup> 525.3264, found 525.3265.

### (*S*)-*tert*-Butyl

#### 2-{2-[3,5-bis(*tert*-butoxycarbonylamino)pentanoyl]-1-methylhydrazinyl}

#### acetate (**8b**)

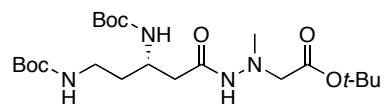

**8b** was prepared in the same manner as described for compound **8a** using **6b** (90.2 mg, 0.288 mmol).

**8b** (51.3 mg, 0.108 mmol, 2 steps 38%) was obtained as a white powder; [α]<sub>D</sub><sup>25</sup> = -40.1 (*c* 0.52, CHCl<sub>3</sub>); m.p. 108.9-110.8 °C; <sup>1</sup>H NMR (400 MHz, CDCl<sub>3</sub>) δ 7.94 (s) and 7.47-7.35 (br d, total 1H), 5.83-5.49 (m, 1H), 5.49-5.11 (m, 1H), 4.15-3.80 (m, 1H), 3.69-3.46 (m, 2H), 3.46-3.20 (m, 1H), 3.05-2.81 (m, 1H), 2.81-2.48 (m, 4H), 2.48-2.18

(m, 1H), 1.75-1.18 (m, 29H);  $^{13}\text{C}$  NMR (100 MHz,  $\text{CDCl}_3$ )  $\delta$  174.7, 170.2, 169.1, 156.1, 82.4, 79.3, 79.0, 58.2, 45.1, 43.9, 38.9, 37.1, 35.2, 28.44 (3 carbons), 28.36 (3 carbons), 28.2 (3 carbons); HRMS (ES+) calcd for  $\text{C}_{22}\text{H}_{42}\text{N}_4\text{O}_7\text{Na}$   $[\text{M}+\text{Na}]^+$  497.2951, found 497.2959.

### (S)-tert-Butyl

#### 2-{2-[3,4-bis(tert-butoxycarbonylamino)butanoyl]-1-methylhydrazinyl}

#### acetate (8c)

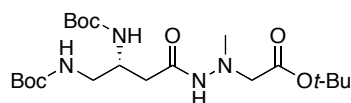

**8c** was prepared in the same manner as described for compound **8a** using **6c** (76.9 mg, 0.257 mmol).

**8c** (46.0 mg, 0.100 mmol, 2 steps 39%) was obtained as a white powder;  $[\alpha]_{\text{D}}^{25} = -5.90$  ( $c$  0.62,  $\text{CHCl}_3$ ); m.p. 84.7-85.9 °C;  $^1\text{H}$  NMR (400 MHz,  $\text{CDCl}_3$ )  $\delta$  8.11 (s) and 7.33 (s, total 1H); 5.78-5.36 (m, 1H), 5.08 (br s, 1H), 4.08-3.83 (m, 1H), 3.63-3.49 (m, 2H), 3.45-3.19 (m, 2H), 3.09- 2.50 (m, 4H), 2.34 (d,  $J = 5.1$  Hz, 1H), 1.57-1.35 (m, 27H);  $^{13}\text{C}$  NMR (100 MHz,  $\text{CDCl}_3$ )  $\delta$  170.1, 168.9, 156.6, 155.8, 82.3, 79.5, 79.3, 58.8, 48.6, 45.1, 43.9, 36.7, 28.4 (6 carbons), 28.2 (3 carbons); HRMS (ES+) calcd for  $\text{C}_{21}\text{H}_{40}\text{N}_4\text{O}_7\text{Na}$   $[\text{M}+\text{Na}]^+$  483.2795, found 483.2792.

#### (S)-2-[2-(3,7-Diaminoheptanoyl)-1-methylhydrazinyl]acetic acid·2TFA (9a)

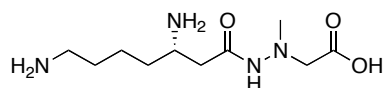

4 M HCl/dioxane (2 mL) was added to **8a** (22.0 mg, 43.8  $\mu\text{mol}$ ) at 0 °C. After stirring for 1 h at room temperature, the mixture was removed under reduced pressure. The residue was purified by preparative HPLC (gradient: milli-Q water (TFA 0.1%) :  $\text{CH}_3\text{CN}$  (TFA 0.1%) = 100 : 0 to milli-Q water (TFA 0.1%) :  $\text{CH}_3\text{CN}$  (TFA 0.1%) = 95 : 5 over 40 min, flow rate 5 mL/min, UV: 222 nm) to give **9a** (14.4 mg, 30.4  $\mu\text{mol}$ , 69%) as TFA salts; m.p. 66.0-67.0 °C;  $^1\text{H}$  NMR (400 MHz,  $\text{D}_2\text{O}$ )  $\delta$  3.66-3.54 (m, 3H), 3.01 (t,  $J = 7.6$  Hz, 2H), 2.68 (s, 3H), 2.60 (dd,  $J = 16$  and 5.6 Hz, 1H), 2.51 (dd,  $J = 16$  and 7.0 Hz, 1H), 1.81-1.63 (m, 4H), 1.57-1.40 (m, 2H);  $^{13}\text{C}$  NMR (100 MHz,  $\text{D}_2\text{O}$ )  $\delta$  173.3, 169.4, 58.6, 48.4, 44.1, 39.0, 35.0, 31.3, 26.3, 21.6; HRMS (ES+) calcd for  $\text{C}_{10}\text{H}_{23}\text{N}_4\text{O}_3$   $[\text{M}+\text{H}]^+$  247.1770, found 247.1770.



**(S)-2-[2-(3,5-Diaminopentanoyl)-1-methylhydrazinyl]acetic acid·2TFA (9b, TCP-112)**

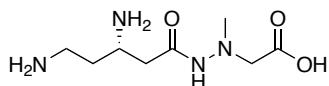

**9b** was prepared in the same manner as described for compound **9a** using **8b** (29.3 mg, 61.8  $\mu\text{mol}$ ).

**9b** (14.6 mg, 32.6  $\mu\text{mol}$ , 53%) was obtained as a colorless solid;  $[\alpha]_{\text{D}}^{25} = +8.21$  ( $c$  1.22,  $\text{H}_2\text{O}$ ); m.p. 127.9-129.0  $^{\circ}\text{C}$ ;  $^1\text{H}$  NMR (400 MHz,  $\text{D}_2\text{O}$ )  $\delta$  3.81-3.72 (m, 1H), 3.71 (s, 2H), 3.18-3.08 (m, 2H), 2.75-2.57 (m, 5H), 2.16-2.00 (m, 2H);  $^{13}\text{C}$  NMR (100 MHz,  $\text{D}_2\text{O}$ )  $\delta$  172.3, 168.9, 58.3, 46.1, 44.4, 35.7, 34.6, 29.7; HRMS (ES+) calcd for  $\text{C}_8\text{H}_{19}\text{N}_4\text{O}_3$   $[\text{M}+\text{H}]^+$  219.1457, found 219.1455.

**(S)-2-[2-(3,4-Diaminobutanoyl)-1-methylhydrazinyl]acetic acid·2TFA (9c)**

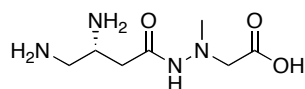

**9c** was prepared in the same manner as described for compound **9a** using **8c** (25.4 mg, 55.2  $\mu\text{mol}$ ).

**9c** (12.4 mg, 28.6  $\mu\text{mol}$ , 52%) was obtained as a colorless solid; m.p. 108.1-108.7  $^{\circ}\text{C}$ ;  $^1\text{H}$  NMR (400 MHz,  $\text{D}_2\text{O}$ )  $\delta$  4.00 (q,  $J = 6.2$  Hz, 1H), 3.64 (s, 2H), 3.48-3.33 (m, 2H), 2.85-2.62 (m, 5H);  $^{13}\text{C}$  NMR (100 MHz,  $\text{D}_2\text{O}$ )  $\delta$  173.3, 168.1, 58.5, 46.1, 44.1, 40.6, 33.4; HRMS (ES+) calcd for  $\text{C}_7\text{H}_{17}\text{N}_4\text{O}_3$   $[\text{M}+\text{H}]^+$  205.1301, found 205.1303.

### 3. Synthesis of derivatives 12a-d

**(S)-tert-Butyl 2-[1-methyl-2-(2,2,14,14-tetramethyl-4,12-dioxo-3,13-dioxo-5,11-diazapentadecanecarbonyl)hydrazinyl]acetate (11a)**

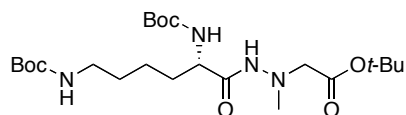

PTSA· $\text{H}_2\text{NN}(\text{Me})\text{CH}_2\text{CO}_2t\text{-Bu}$  **7** (62.8 mg, 0.189 mmol) and HOBt· $\text{H}_2\text{O}$  (29.0 mg, 0.189 mmol) were added to a solution of Boc-Lys(Boc)-OH·DCHA **4a** (50.0 mg, 94.7  $\mu\text{mol}$ ) in DMF (2 mL).  $\text{Et}_3\text{N}$  (26.2  $\mu\text{L}$ , 0.189 mmol) and EDC·HCl (36.2 mg, 0.189 mmol) were added to the mixture at 0  $^{\circ}\text{C}$ . After stirring for overnight at room temperature, the mixture was poured into 10% citric acid aqueous solution and extracted

with AcOEt. The extracts were washed with saturated aqueous NaHCO<sub>3</sub> solution, H<sub>2</sub>O and brine, dried over Na<sub>2</sub>SO<sub>4</sub>, filtered and concentrated under reduced pressure. The residue was purified by silica gel flash column chromatography with CHCl<sub>3</sub>/MeOH (100 : 1) to give **11a** (45.1 mg, 92.3 μmol, 98%) as a colorless oil; [α]<sub>D</sub><sup>25</sup> = -3.08 (*c* 0.50, CHCl<sub>3</sub>); <sup>1</sup>H NMR (400 MHz, CDCl<sub>3</sub>) δ 8.16 (s) and 7.54 (br d, *J* = 24 Hz, total 1H), 5.32-5.06 (m, 1H), 4.90-4.52 (m, 1H), 4.08-3.86 (m, 1H), 3.78-3.33 (m, 2H), 3.26-3.03 (m, 2H), 2.75 (s, 3H), 1.90-1.20 (m, 33H); <sup>13</sup>C NMR (100 MHz, CDCl<sub>3</sub>) δ 170.1, 169.3, 156.1, 155.6, 82.4, 80.0, 79.5, 58.4, 53.3, 43.9, 40.1, 32.3, 29.7, 28.46 (3 carbons), 28.41 (3 carbons), 28.1 (3 carbons), 22.5; HRMS (ES<sup>+</sup>) calcd for C<sub>23</sub>H<sub>45</sub>N<sub>4</sub>O<sub>7</sub> [M+H]<sup>+</sup> 489.3288, found 489.3278.

**(S)-tert-Butyl**

**2-[1-methyl-2-(2,2,13,13-tetramethyl-4,11-dioxo-3,12-dioxa-5,10-diaza tetradecanecarbonyl)hydrazinyl]acetate (11b)**

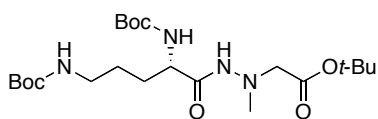

**11b** was prepared in the same manner as described for compound **11a** using Boc-Orn(Boc)-OH **10** (100 mg, 0.303 mmol).

**11b** (131 mg, 0.277 mmol, 91%) was obtained as a colorless oil; <sup>1</sup>H NMR (400 MHz, CDCl<sub>3</sub>) δ 8.28 (s) and 7.63 (d, *J* = 25 Hz, total 1H), 5.38-5.18 (m, 1H), 4.79 (br s, 1H), 4.13-3.95 (m, 1H), 3.77-3.38 (m, 2H), 3.29-3.10 (m, 2H), 2.75 (s, 3H), 1.89-1.34 (m, 31H); <sup>13</sup>C NMR (100 MHz, CDCl<sub>3</sub>) δ 170.0, 169.1, 156.0, 155.4, 82.2, 79.5, 79.0, 58.4, 52.8, 43.8, 39.8, 29.9, 28.3 (3 carbons), 28.2 (3 carbons), 28.1 (3 carbons), 26.1; HRMS (ES<sup>+</sup>) calcd for C<sub>22</sub>H<sub>43</sub>N<sub>4</sub>O<sub>7</sub> [M+H]<sup>+</sup> 475.3132, found 475.3127.

**(S)-tert-Butyl 2-[1-methyl-2-(2,2,12,12-tetramethyl-4,10-dioxo-3,11-dioxa-5,9-diazatridecanecarbonyl)hydrazinyl]acetate (11c)**

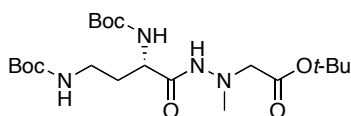

**11c** was prepared in the same manner as described for compound **11a** using **4c** (60.6 mg, 0.190 mmol).

**11c** (59.4 mg, 0.129 mmol, 68%) was obtained as a colorless oil;  $[\alpha]_D^{25} = -20.4$  ( $c$  0.63,  $\text{CHCl}_3$ );  $^1\text{H NMR}$  (400 MHz,  $\text{CDCl}_3$ )  $\delta$  8.30 (s) and 7.69-7.48 (m, total 1H), 5.46-5.26 (m, 1H), 5.13 (br s) and 4.90-4.72 (m, total 1H), 4.15-4.00 (m, 1H) and 3.78-3.50 (m, 2H), 3.48-3.29 (m, 1H), 3.11-2.92 (m, 1H), 2.76 (s, 3H), 2.06-1.68 (m, 2H), 1.68-1.19 (m, 27H);  $^{13}\text{C NMR}$  (100 MHz,  $\text{CDCl}_3$ )  $\delta$  169.9, 169.8, 156.1, 155.7, 82.4, 80.1, 79.7, 58.4, 50.8, 43.4, 36.8, 34.0, 28.4 (3 carbons), 28.3 (3 carbons), 28.2 (3 carbons); HRMS (ES+) calcd for  $\text{C}_{21}\text{H}_{41}\text{N}_4\text{O}_7$   $[\text{M}+\text{H}]^+$  461.2975, found 461.2978.

### (S)-tert-Butyl

#### 2-[1-methyl-2-(2,2,11,11-tetramethyl-4,9,dioxo-3,10-dioxa-5,8-diazado decanecarbonyl)hydrazinyl]acetate (**11d**)

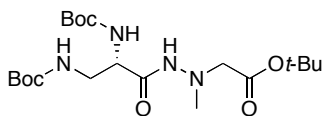

**11d** was prepared in the same manner as described for compound **6a** using **4c** (172 mg, 0.565 mmol).

**11d** (158 mg, 0.353 mmol, 62%) was obtained as a white solid;  $[\alpha]_D^{25} = -12.4$  ( $c$  0.38,  $\text{CHCl}_3$ ); m.p. 64.6-65.9 °C;  $^1\text{H NMR}$  (400 MHz,  $\text{CDCl}_3$ )  $\delta$  8.55 (s) and 7.73-7.30 (m, total 1H), 5.82 (br s, 1H), 5.19 (br s, 1H), 4.16 (br s, 1H), 3.56 (d,  $J = 5.2$  Hz, 2H), 3.55-3.39 (m, 2H), 2.75 (s, 3H), 1.49 (s, 9H), 1.46-1.33 (m, 18H);  $^{13}\text{C NMR}$  (100 MHz,  $\text{CDCl}_3$ )  $\delta$  169.8, 168.4, 157.0, 155.8, 82.3, 80.1, 79.8, 58.4, 54.7, 43.9, 42.3, 28.28 (3 carbons), 28.25 (3 carbons), 28.1 (3 carbons); HRMS (ES+) calcd for  $\text{C}_{20}\text{H}_{39}\text{N}_4\text{O}_7$   $[\text{M}+\text{H}]^+$  447.2819, found 447.2827.

#### (S)-2-[2-(2,6-Diaminohexanoyl)-1-methylhydrazinyl]acetic acid·2TFA (**12a**)

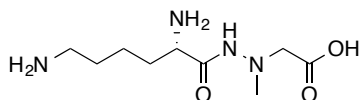

4 M HCl/dioxane (2 mL) was added to **11a** (26.7 mg, 54.6  $\mu\text{mol}$ ) at 0 °C. After stirring for 1 h at room temperature, the mixture was removed under reduced pressure. The residue was purified by preparative HPLC (gradient: milli-Q water (TFA 0.1%) :  $\text{CH}_3\text{CN}$  (TFA 0.1%) = 100 : 0 to milli-Q water (TFA 0.1%) :  $\text{CH}_3\text{CN}$  (TFA 0.1%) = 95 : 5 over 40 min, flow rate 5 mL/min, UV: 222 nm) to give **9a** (17.4 mg, 37.8  $\mu\text{mol}$ , 69%) as TFA salts; m.p. 71.1-72.5 °C;  $^1\text{H NMR}$  (400 MHz,  $\text{D}_2\text{O}$ )  $\delta$  3.87 (t,  $J = 6.7$  Hz,

1H), 3.65 (q,  $J = 17$  Hz, 2H), 3.00 (t,  $J = 7.7$  Hz, 2H), 2.70 (s, 3H), 2.00-1.82 (m, 2H), 1.76-1.65 (m, 2H), 1.41 (q,  $J = 7.7$  Hz, 2H);  $^{13}\text{C}$  NMR (100 MHz,  $\text{D}_2\text{O}$ )  $\delta$  173.2, 167.4, 58.6, 51.8, 44.2, 38.9, 30.2, 26.3, 21.2; HRMS (ES+) calcd for  $\text{C}_9\text{H}_{21}\text{N}_4\text{O}_3$   $[\text{M}+\text{H}]^+$  233.1614, found 233.1613.

**(S)-2-[2-(2,4-Diaminopentanoyl)-1-methylhydrazinyl]acetic acid·2TFA (12b)**

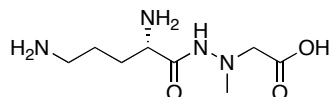

**12b** was prepared in the same manner as described for compound **12a** using **11b** (86.8 mg, 0.183 mmol).

**12b** (36.4 mg, 81.7  $\mu\text{mol}$ , 45%) was obtained as a light yellow solid; m.p. 51.6-52.5  $^\circ\text{C}$ ;  $^1\text{H}$  NMR (400 MHz,  $\text{D}_2\text{O}$ )  $\delta$  3.92 (t,  $J = 6.7$  Hz, 1H), 3.78-3.62 (m, 2H), 3.02 (t,  $J = 7.6$  Hz, 2H), 2.70 (s, 3H), 2.03-1.86 (m, 2H), 1.78-1.63 (m, 2H);  $^{13}\text{C}$  NMR (100 MHz,  $\text{D}_2\text{O}$ )  $\delta$  172.5, 167.0, 58.2, 51.5, 44.4, 38.7, 27.7, 22.3; HRMS (ES+) calcd for  $\text{C}_8\text{H}_{19}\text{N}_4\text{O}_3$   $[\text{M}+\text{H}]^+$  219.1457, found 219.1456.

**(S)-2-[2-(2,4-Diaminobutanoyl)-1-methylhydrazinyl]acetic acid·2TFA (12c)**

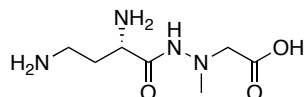

**12c** was prepared in the same manner as described for compound **12a** using **11c** (29.9 mg, 64.9  $\mu\text{mol}$ ).

**12c** (12.7 mg, 29.3  $\mu\text{mol}$ , 45%) was obtained as a yellow solid; m.p. 71.7-72.4  $^\circ\text{C}$ ;  $^1\text{H}$  NMR (400 MHz,  $\text{D}_2\text{O}$ )  $\delta$  4.00 (t,  $J = 6.7$  Hz, 1H), 3.78-3.61 (m, 2H), 3.17-3.02 (m, 2H), 2.71 (s, 3H), 2.34-2.20 (m, 2H);  $^{13}\text{C}$  NMR (100 MHz,  $\text{D}_2\text{O}$ )  $\delta$  172.8, 166.3, 58.2, 49.7, 44.3, 35.1, 28.3; HRMS (ES+) calcd for  $\text{C}_7\text{H}_{17}\text{N}_4\text{O}_3$   $[\text{M}+\text{H}]^+$  205.1301, found 205.1300.

**(S)-2-[2-(2,3-Diaminopropanoyl)-1-methylhydrazinyl]acetic acid·2TFA (12d)**

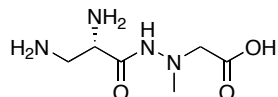

**12d** was prepared in the same manner as described for compound **11a** using **11d** (24.4 mg, 53.0  $\mu\text{mol}$ ).

**12d** (4.83 mg, 11.6  $\mu\text{mol}$ , 22%) was obtained as a yellow solid; m.p. 113.2-115.1  $^\circ\text{C}$ ;  $^1\text{H}$  NMR (400 MHz,  $\text{D}_2\text{O}$ )  $\delta$  4.28 (t,  $J = 6.0$  Hz, 1H), 3.83-3.63 (m, 2H), 3.63-3.43 (m, 2H),

2.73 (s, 3H);  $^{13}\text{C}$  NMR (100 MHz,  $\text{D}_2\text{O}$ )  $\delta$  175.6, 167.2, 60.8, 52.6, 47.0, 42.3; HRMS (ES+) calcd for  $\text{C}_6\text{H}_{15}\text{N}_4\text{O}_3$   $[\text{M}+\text{H}]^+$  191.1144, found 191.1143.

#### 4. Synthesis of derivatives 15a-d

##### (S)-Ethyl

##### 2-{2-[3,5-bis(*tert*-Butoxycarbonylamino)pentanoyl]-1-methylhydrazinyl}acetate

##### (14a)

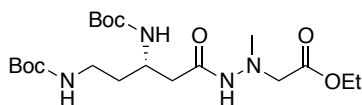

**14a** was prepared in the same manner as described for compound **8b** using **6b** (105 mg, 0.335 mmol) and  $\text{H}_2\text{NN}(\text{Me})\text{CH}_2\text{CO}_2\text{Et}$  **13a** (0.670 mmol).

**14a** (46.5 mg, 0.104 mmol, 2 steps 31%) was obtained as a colorless solid;  $[\alpha]_{\text{D}}^{25} = -44.6$  (*c* 1.01,  $\text{CHCl}_3$ ); m.p. 101.4-102.0 °C;  $^1\text{H}$  NMR (400 MHz,  $\text{CDCl}_3$ )  $\delta$  7.81 (s) and 7.28 (br d, total 1H), 5.77 (m, 1H), 5.44-5.20 (m, 1H), 4.21 (q,  $J = 7.2$  Hz, 2H), 4.08-3.88 (m, 1H), 3.75-3.46 (m, 2H), 3.38 (br s, 1H), 2.92 (br s 1H), 2.88-2.49 (m, 2H), 2.48-2.39 (m) and 2.24 (dd,  $J = 15$  and 5.8 Hz, total 1H), 1.75-1.55 (m, 2H), 1.44 (s, 18H), 1.32-1.23 (m, 3H);  $^{13}\text{C}$  NMR (100 MHz,  $\text{CDCl}_3$ )  $\delta$  174.7, 169.7, 156.14, 156.04, 79.4, 79.1, 60.1, 57.7, 45.4, 44.1, 38.9, 37.2, 35.1, 28.5 (3 carbons), 28.4 (3 carbons), 14.2; HRMS (ES+) calcd for  $\text{C}_{20}\text{H}_{39}\text{N}_4\text{O}_7$   $[\text{M}+\text{H}]^+$  447.2819, found 447.2812.

##### (S)-Benzyl 2-{2-[3,5-bis(*tert*-butoxycarbonylamino)pentanoyl]-1-methylhydrazinyl}acetate (14b)

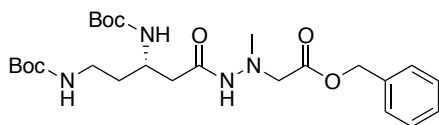

**14b** was prepared in the same manner as described for compound **8b** using **6b** (101 mg, 0.322 mmol) and  $\text{H}_2\text{NN}(\text{Me})\text{CH}_2\text{CO}_2\text{Bn}$  **13b** (87.3 mg, 0.450 mmol).

**14b** (64.9 mg, 0.127 mmol, 2 steps 57%) was obtained as a white solid;  $[\alpha]_{\text{D}}^{25} = -34.5$  (*c* 2.17,  $\text{CHCl}_3$ ); m.p. 93.1-95.0 °C;  $^1\text{H}$  NMR (400 MHz,  $\text{CDCl}_3$ )  $\delta$  7.77 (s) and 7.42-7.27 (m, total 6H), 5.72-5.54 (m, 1H), 5.42-5.09 (m, 3H), 4.04-3.86 (m, 1H), 3.81-3.49 (m, 2H), 3.37 (br s, 1H), 3.04-2.50 (m, 5H), 2.49-2.35 (m) and 2.29-2.17 (m, total 1H), 1.78-1.57 (m, 2H), 1.43 (s, 18H);  $^{13}\text{C}$  NMR (100 MHz,  $\text{CDCl}_3$ )  $\delta$  170.5, 169.5,

156.2, 156.0, 135.1, 128.7 (2 carbons), 128.6, 128.5 (2 carbons), 79.3, 79.0, 66.7, 57.7, 45.4, 44.1, 38.9, 37.2, 34.8, 28.5 (3 carbons), 28.4 (3 carbons); HRMS (ES+) calcd for C<sub>25</sub>H<sub>41</sub>N<sub>4</sub>O<sub>7</sub> [M+H]<sup>+</sup> 509.2975, found 509.2981.

**(S)-di-tert-Butyl**

**{5-[2-(2-ethylamino-2-oxoethyl)-2-methylhydrazinyl]-5-oxopentane-1,3-diyl}dicarbamate (14c)**

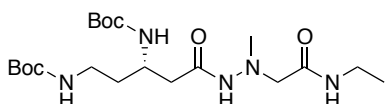

10 % Pd/C (7.5 mg) was added to a solution of **14b** (75 mg, 0.148 mmol) in MeOH (2 mL) at room temperature. The resulting mixture was subjected to three cycles of vacuum followed by flush with H<sub>2</sub> before stirring for 15 min under an atmosphere of H<sub>2</sub>. The mixture was filtered through a pad of Celite<sup>®</sup> with MeOH, and the resulting filtrate was concentrated under reduced pressure. The residue was used in the next step without further purification. Ethylamine·HCl (24.1 mg, 0.296 mmol) and HOBt·H<sub>2</sub>O (45.3 mg, 0.296 mmol) were added to a solution containing above residue in DMF (2 mL) at room temperature. Et<sub>3</sub>N (41.0 μL, 0.296 mmol) and EDC·HCl (56.7 mg, 0.296 mmol) were added to the mixture at 0 °C. After stirring for overnight at room temperature, the mixture was poured into 10% citric acid aqueous solution and extracted with AcOEt. The extracts were washed with saturated aqueous NaHCO<sub>3</sub> solution, H<sub>2</sub>O and brine and dried over Na<sub>2</sub>SO<sub>4</sub>, filtered and concentrated under reduced pressure. The residue was purified by silica gel flash column chromatography with CHCl<sub>3</sub>/MeOH (100 : 1) to give **14c** (46.0 mg, 0.103 mmol, 2 steps 70%) as a white solid. [α]<sub>D</sub><sup>25</sup> = -16.4 (*c* 1.12, CHCl<sub>3</sub>); m.p. 123.0-124.0 °C; <sup>1</sup>H NMR (400 MHz, CDCl<sub>3</sub>) δ 7.90 (br s, 1H), 5.53 (br s, 1H), 5.22 (br, s, 1H), 4.06-3.82 (m, 1H), 3.55-3.14 (m, 5H), 2.96 (br s, 1H), 2.68 (s, 3H), 2.52-2.27 (m, 2H), 2.04 (s, 1H), 1.70-1.56 (m, 2H), 1.43 (s, 18H), 1.14 (t, *J* = 7.3 Hz, 3H); <sup>13</sup>C NMR (100 MHz, CDCl<sub>3</sub>) δ 170.0, 168.9, 156.3, 156.0, 79.6, 79.3, 62.6, 46.7, 45.6, 38.8, 37.1, 35.2, 34.1, 28.5 (3 carbons), 28.4 (3 carbons), 14.5; HRMS (ES+) calcd for C<sub>20</sub>H<sub>39</sub>N<sub>5</sub>O<sub>6</sub>Na [M+Na]<sup>+</sup> 468.2798 found 468.2799.

**(S)-di-tert-Butyl**

**{5-[2-(2-benzylamino-2-oxoethyl)-2-methylhydrazinyl]-5-oxopentane-1,3-diyl}dicarbamate (14d)**

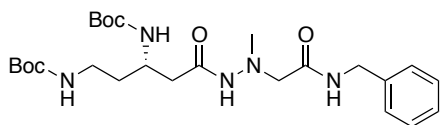

**14d** was prepared in the same manner as described for compound **8b** using **6b** (98.0 mg, 0.313 mmol) and  $\text{H}_2\text{NN}(\text{Me})\text{CH}_2\text{CONHBn}$  **13c** (97.8 mg, 0.506 mmol).

**14d** (41.3 mg, 81.3  $\mu\text{mol}$ , 2 steps 26%) was obtained as a white solid;  $[\alpha]_{\text{D}}^{25} = -22.4$  ( $c$  0.62,  $\text{CHCl}_3$ ); m.p. 168.5-169.7  $^\circ\text{C}$ ;  $^1\text{H}$  NMR (400 MHz,  $\text{CDCl}_3$ )  $\delta$  8.35-8.21 (m, 1H), 7.69 (s, 1H), 7.39-7.20 (m, 5H), 5.38 (br d, 1H), 5.15 (br s, 1H), 4.53-4.38 (m, 2H), 3.89-3.76 (m, 1H), 3.38 (s, 2H), 3.36-3.14 (m, 1H), 3.01-2.94 (m, 1H), 2.64 (s, 3H), 2.31 (dd,  $J = 16$  and 5.1 Hz) and 2.21 (dd,  $J = 14$  and 6.3 Hz, total 2H), 1.78-1.50 (m, 2H), 1.44 (s, 18H);  $^{13}\text{C}$  NMR (100 MHz,  $\text{CDCl}_3$ )  $\delta$  169.9, 168.9, 156.3, 155.9, 138.3, 128.6 (2 carbons), 128.0 (2 carbons), 127.3, 79.6, 79.4, 62.6, 46.6, 45.6, 43.1, 38.6, 37.2, 34.9, 28.5 (3 carbons), 28.4 (3 carbons); HRMS (ES+) calcd for  $\text{C}_{25}\text{H}_{42}\text{N}_5\text{O}_6$   $[\text{M}+\text{H}]^+$  508.3135, found 508.3116.

**(S)-Ethyl 2-[2-(3,5-diaminopentanoyl)-1-methylhydrazinyl]acetate·2TFA (15a)**

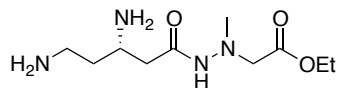

**15a** was prepared in the same manner as described for compound **8b** using **14a** (29.1 mg, 65.2  $\mu\text{mol}$ ). The residue was purified by preparative HPLC (gradient: milli-Q water (TFA 0.1%) :  $\text{CH}_3\text{CN}$  (TFA 0.1%) = 95 : 5 to milli-Q water (TFA 0.1%) :  $\text{CH}_3\text{CN}$  (TFA 0.1%) = 90 : 10 over 40 min, flow rate 5 mL/min, UV: 222 nm).

**15a** (11.0 mg, 23.3  $\mu\text{mol}$ , 36%) was obtained as a colorless solid;  $[\alpha]_{\text{D}}^{25} = +8.44$  ( $c$  0.43,  $\text{H}_2\text{O}$ ); m.p. 72.3-73.8  $^\circ\text{C}$ ;  $^1\text{H}$  NMR (300 MHz,  $\text{D}_2\text{O}$ )  $\delta$  4.17 (q,  $J = 7.2$  Hz, 2H), 3.74-3.70 (m, 1H), 3.61 (s, 2H), 3.10 (t,  $J = 8.2$  Hz, 2H), 2.67-2.56 (m, 5H), 2.11-2.01 (m, 2H), 1.23 (t,  $J = 7.1$  Hz, 3H); HRMS (ES+) calcd for  $\text{C}_{10}\text{H}_{23}\text{N}_4\text{O}_3$   $[\text{M}+\text{H}]^+$  247.1770, found 247.1764.

**(S)-Benzyl 2-[2-(3,5-diaminohexanoyl)-1-methylhydrazinyl]acetate·2TFA (15b)**

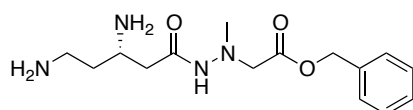

**15b** was prepared in the same manner as described for compound **8b** using **14b** (64.9 mg, 0.128 mmol). The residue was purified by preparative HPLC (gradient: milli-Q water (TFA 0.1%) : CH<sub>3</sub>CN (TFA 0.1%) = 85 : 15 to milli-Q water (TFA 0.1%) : CH<sub>3</sub>CN (TFA 0.1%) = 55 : 45 over 40 min, flow rate 5 mL/min, UV: 222 nm).

**15b** (34.6 mg, 64.5 μmol, 50%) was obtained as a colorless solid;  $[\alpha]_D^{25} = +5.80$  (*c* 1.15, H<sub>2</sub>O); m.p. 65.5-66.3 °C; <sup>1</sup>H NMR (400 MHz, D<sub>2</sub>O) δ 7.44-7.39 (m, 5H), 5.20 (s, 2H), 3.68-3.60 (m, 3H), 3.07 (t, *J* = 7.2 Hz, 2H), 2.63 (s, 3H), 2.59-2.44 (m, 2H), 2.14-1.98 (m, 2H); <sup>13</sup>C NMR (100 MHz, D<sub>2</sub>O) δ 173.6, 171.8, 138.2, 131.7 (2 carbons), 131.6, 131.3 (2 carbons), 70.1, 61.3, 48.9, 47.2, 38.5, 37.6, 32.7; HRMS (ES+) calcd for C<sub>15</sub>H<sub>25</sub>N<sub>4</sub>O<sub>3</sub> [M+H]<sup>+</sup> 309.1927, found 309.1915.

**(S)-2-(2-(3,5-Diaminopentanoyl)-1-methylhydrazinyl)-N-ethylacetamide·2TFA**  
**(15c)**

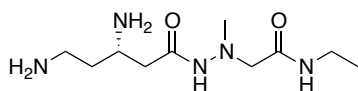

**15c** was prepared in the same manner as described for compound **15b** using **14c** (21.3 mg, 47.8 μmol). The residue was purified by preparative HPLC (gradient: milli-Q water (TFA 0.1%) : CH<sub>3</sub>CN (TFA 0.1%) = 95 : 5 to milli-Q water (TFA 0.1%) : CH<sub>3</sub>CN (TFA 0.1%) = 85 : 15 over 40 min, flow rate 5 mL/min, UV: 222 nm).

**15c** (19.6 mg, 41.4 μmol, 87%) was obtained as a white solid;  $[\alpha]_D^{25} = +20.4$  (*c* 0.38, H<sub>2</sub>O); m.p. 133.7-134.4 °C; <sup>1</sup>H NMR (400 MHz, D<sub>2</sub>O) δ 3.80-3.69 (m, 1H), 3.45 (s, 2H), 3.22 (q, *J* = 7.3 Hz, 2H), 3.17-3.03 (m, 2H), 2.70-2.54 (m, 4H), 2.18-1.98 (m, 2H), 1.10 (t, *J* = 7.3 Hz, 3H); <sup>13</sup>C NMR (100 MHz, D<sub>2</sub>O) δ 174.0, 172.4, 64.3, 49.1, 48.0, 38.6, 37.6, 37.3, 32.8, 16.4; HRMS (ES+) calcd for C<sub>10</sub>H<sub>24</sub>N<sub>5</sub>O<sub>2</sub> [M+H]<sup>+</sup> 246.1930, found 246.1928.

**(S)-N-Benzyl-2-[2-(3,5-diaminopentanoyl)-1-methylhydrazinyl]acetamide·2TFA**  
**(15d)**

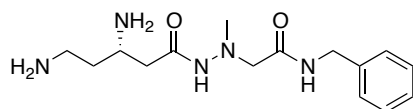

**15d** was prepared in the same manner as described for compound **15b** using **14c** (34.7 mg, 68.3 μmol).



**15d** (14.8 mg, 27.6  $\mu\text{mol}$ , 40%) was obtained as a white solid;  $[\alpha]_{\text{D}}^{25} = +0.90$  ( $c$  0.49,  $\text{H}_2\text{O}$ ); m.p. 77.3-78.2  $^{\circ}\text{C}$ ;  $^1\text{H}$  NMR (400 MHz,  $\text{D}_2\text{O}$ )  $\delta$  7.43-7.22 (m, 5H), 4.41 (q,  $J = 15$  Hz, 2H), 3.67-3.25 (m, 3H), 3.11-2.98 (m, 2H), 2.62 (s, 3H), 2.67-2.40 (m, 2H), 2.08-1.89 (m, 2H);  $^{13}\text{C}$  NMR (100 MHz,  $\text{D}_2\text{O}$ )  $\delta$  174.1, 172.4, 140.7, 131.7 (2 carbons), 131.7 (2 carbons), 130.5, 64.0, 48.9, 48.0, 45.7, 38.6, 37.8, 32.9; HRMS (ES+) calcd for  $\text{C}_{15}\text{H}_{26}\text{N}_5\text{O}_2$   $[\text{M}+\text{H}]^+$  308.2085, found 308.2087.

## 5. Synthesis of derivatives 17a-l

### (S)-2-Bromobenzyl 2-{2-[3,5-bis(*tert*-butoxycarbonylamino)pentanoyl]-1-methylhydrazinyl}acetate (**16a**)

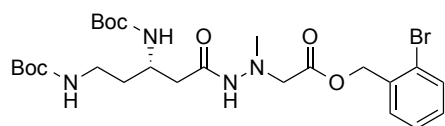

10 % Pd/C (10.3 mg) was added to a solution of **14b** (103 mg, 0.203 mmol) in MeOH (2 mL) at room temperature. The resulting mixture was subjected to three cycles of vacuum followed by flush with  $\text{H}_2$  before stirring for 15 min under an atmosphere of  $\text{H}_2$ . The mixture was filtered through a pad of Celite<sup>®</sup> with MeOH, and the resulting filtrate was concentrated under reduced pressure. The residue was used in the next step without further purification. *o*-Bromobenzyl alcohol (45.6 mg, 0.244 mmol) and DMAP (2.48 mg, 20.3  $\mu\text{mol}$ ) were added to a solution containing above residue in DMF (2 mL) at room temperature. DCC (46.0 mg, 0.223 mmol) was added to the mixture at 0  $^{\circ}\text{C}$ . After stirring for overnight at room temperature, the mixture was concentrated under reduced pressure. The residue was filtered with  $\text{CHCl}_3$ . The organic layer was washed with  $\text{H}_2\text{O}$ , brine, dried over  $\text{Na}_2\text{SO}_4$ , filtered and concentrated under reduced pressure. The residue was purified by silica gel flash column chromatography with  $\text{CHCl}_3/\text{MeOH}$  (100 : 1) to give **16a** (56.1 mg, 95.5  $\mu\text{mol}$ , 2 steps 47%) as a white solid;  $[\alpha]_{\text{D}}^{25} = -30.7$  ( $c$  1.11,  $\text{CHCl}_3$ ); m.p. 122.0-123.4  $^{\circ}\text{C}$ ;  $^1\text{H}$  NMR (400 MHz,  $\text{CDCl}_3$ )  $\delta$  7.77 (s) and 7.44-7.28 (m, total 3H), 7.60 (d,  $J = 8.0$  Hz, 1H), 7.25-7.20 (m, 1H), 5.74-5.57 (m, 1H), 5.40-5.20 (m, 3H), 4.06-3.89 (m, 1H), 3.83-3.56 (m, 2H), 3.37 (br s, 1H), 3.00-2.89 (m, 1H), 2.83-2.72 (m) and 2.63-2.50 (m, total 4H), 2.46-2.38 (m) and 2.23 (dd,  $J = 15$  and 5.8 Hz, total 1H), 1.74-1.57 (m, 2H), 1.44 (s, 18H);  $^{13}\text{C}$  NMR (100 MHz,  $\text{CDCl}_3$ )  $\delta$  174.8, 169.3, 156.1, 134.4, 133.0, 130.5, 130.3, 130.2, 127.7, 123.7, 79.3, 79.0, 66.3, 57.7,

45.4, 44.1, 38.9, 37.1, 35.0, 28.5 (3 carbons), 28.4 (3 carbons); HRMS (ES+) calcd for C<sub>25</sub>H<sub>40</sub>N<sub>4</sub>O<sub>7</sub>Br [M+H]<sup>+</sup> 587.2080, found 587.2092.

**(S)-3-Bromobenzyl 2-{2-[3,5-bis(*tert*-butoxycarbonylamino)pentanoyl]-1-methylhydrazinyl}acetate (16b)**

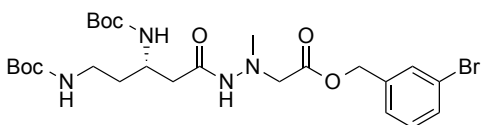

**16b** was prepared in the same manner as described for compound **16a** using **14b** (108 mg, 0.212 mmol) and *m*-bromobenzyl alcohol (47.5 mg, 0.254 mmol).

**16b** (84.6 mg, 0.144 mmol, 2 steps 68%) was obtained as a white solid;  $[\alpha]_D^{25} = -27.7$  (*c* 1.24, CHCl<sub>3</sub>); m.p. 82.5-83.6 °C; <sup>1</sup>H NMR (400 MHz, CDCl<sub>3</sub>) δ 7.82 (s) and 7.34 (br d, total 1H), 7.57-7.44 (m, 2H), 7.32-7.20 (m, 3H), 5.73-5.57 (m, 1H), 5.41-5.20 (m, 1H), 5.14 (s, 2H), 4.06-3.88 (m, 1H), 3.82-3.47 (m, 2H), 3.36 (br s, 1H), 3.04-2.88 (m, 1H), 2.87-2.49 (m, 3H), 2.48-2.38 (m) and 2.24 (dd, *J* = 15 and 5.7 Hz, total 1H), 1.86-1.57 (m, 2H), 1.43 (s, 18H); <sup>13</sup>C NMR (100 MHz, CDCl<sub>3</sub>) δ 174.8, 169.3, 156.0, 137.2, 131.7, 131.4, 130.3, 126.9, 122.6, 79.3, 79.0, 65.7, 58.9, 57.8, 45.5, 44.1, 38.9, 37.1, 35.0, 28.4 (3 carbons), 28.3 (3 carbons); HRMS (ES+) calcd for C<sub>25</sub>H<sub>40</sub>N<sub>4</sub>O<sub>7</sub>Br [M+H]<sup>+</sup> 587.2080, found 587.2080.

**(S)-4-Bromobenzyl 2-{2-[3,5-bis(*tert*-butoxycarbonylamino)pentanoyl]-1-methylhydrazinyl}acetate (16c)**

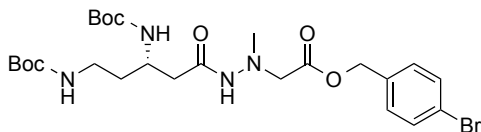

**16c** was prepared in the same manner as described for compound **16a** using **14b** (120 mg, 0.236 mmol) and *p*-bromobenzyl alcohol (53.0 mg, 0.283 mmol).

**16c** (71.6 mg, 0.122 mmol, 2 steps 52%) was obtained as a white solid;  $[\alpha]_D^{25} = -31.7$  (*c* 1.10, CHCl<sub>3</sub>); m.p. 121.7-122.4 °C; <sup>1</sup>H NMR (400 MHz, CDCl<sub>3</sub>) δ 7.77 (s) and 7.28 (br s, total 1H), 7.51 (d, *J* = 8.3 Hz, 2H), 7.25-7.21 (m, 2H), 5.71-5.52 (m, 1H), 5.40-5.18 (m, 1H), 5.12 (s, 2H), 4.07-3.85 (m, 1H), 3.69-3.50 (m, 2H), 3.36 (br s, 1H), 3.00-2.86 (m, 1H), 2.68-2.48 (m, 4H), 2.45-2.38 (m) and 2.23 (dd, *J* = 15 and 5.8 Hz, total 1H), 1.74-1.57 (m, 2H), 1.43 (s, 18H); <sup>13</sup>C NMR (100 MHz, CDCl<sub>3</sub>) δ 174.7, 169.4, 156.1,

134.0, 131.9 (2 carbons), 130.2 (2 carbons), 122.7, 79.3, 79.0, 65.9, 58.9, 57.7, 45.4, 44.1, 38.9, 37.1, 35.0, 28.5 (3 carbons), 28.4 (3 carbons); HRMS (ES+) calcd for C<sub>25</sub>H<sub>40</sub>N<sub>4</sub>O<sub>7</sub>Br [M+H]<sup>+</sup> 587.2080, found 587.2078.

**(S)-2-Chlorobenzyl 2-{2-[3,5-bis(*tert*-butoxycarbonylamino)pentanoyl]-1-methylhydrazinyl}acetate (16d)**

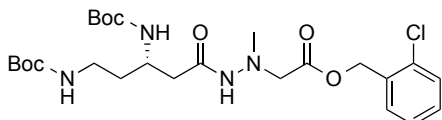

**16d** was prepared in the same manner as described for compound **16a** using **14b** (98.0 mg, 0.193 mmol) and *o*-chlorobenzyl alcohol (32.9 mg, 0.232 mmol).

**16d** (37.2 mg, 0.069 mmol, 2 steps 36%) was obtained as a white solid;  $[\alpha]_D^{25} = -38.0$  (*c* 1.00, CHCl<sub>3</sub>); m.p. 90.3-91.3 °C; <sup>1</sup>H NMR (400 MHz, CDCl<sub>3</sub>) δ 7.88 (s, 1H), 7.46-7.25 (m, 4H), 5.74-5.56 (m, 1H), 5.46-5.20 (m, 3H), 4.06-3.88 (m, 1H), 3.82-3.45 (m, 2H), 3.37 (br s, 1H), 3.02-2.48 (m, 5H), 2.42-2.36 (m) and 2.24 (dd, *J* = 15 and 6.0 Hz, total 1H), 1.79-1.54 (m, 2H), 1.43 (s, 18H); <sup>13</sup>C NMR (100 MHz, CDCl<sub>3</sub>) δ 174.7, 169.5, 156.1, 156.0, 133.9, 132.7, 130.4, 130.0, 129.7, 127.1, 79.2, 78.9, 64.0, 57.7, 45.4, 44.0, 38.9, 37.2, 34.8, 28.45 (3 carbons), 28.36 (3 carbons); HRMS (ES+) calcd for C<sub>25</sub>H<sub>39</sub>N<sub>4</sub>O<sub>7</sub>NaCl [M+Na]<sup>+</sup> 565.2405, found 265.2393.

**(S)-3-Chlorobenzyl 2-{2-[3,5-bis(*tert*-butoxycarbonylamino)pentanoyl]-1-methylhydrazinyl}acetate (16e)**

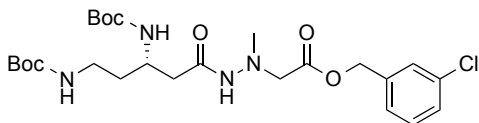

**16e** was prepared in the same manner as described for compound **16a** using **14b** (100 mg, 0.197 mmol) and *m*-chlorobenzyl alcohol (34.4 mg, 0.242 mmol).

**16e** (24.4 mg, 0.045 mmol, 2 steps 23%) was obtained as a white solid;  $[\alpha]_D^{25} = -19.3$  (*c* 1.00, CHCl<sub>3</sub>); m.p. 95.9-96.3 °C; <sup>1</sup>H NMR (400 MHz, CDCl<sub>3</sub>) δ 7.78 (s) and 7.38-7.18 (m, total 5H), 5.71-5.51 (m, 1H), 5.40-5.06 (m, 3H), 4.06-3.86 (m, 1H), 3.81-3.51 (m, 2H), 3.42-3.28 (m, 1H), 3.02-2.86 (m, 1H), 2.86-2.46 (m, 4H), 2.46-2.36 (m) and 2.24 (dd, *J* = 15 and 5.9 Hz, total 1H), 1.75-1.52 (m, 2H), 1.52-1.30 (m, 18H); <sup>13</sup>C NMR (100 MHz, CDCl<sub>3</sub>) δ 170.3, 169.4, 156.2 (2 carbons), 137.1, 134.6, 130.0, 128.8, 128.5,

126.4, 79.3, 79.0, 65.7, 57.7, 45.5, 44.1, 38.9, 37.1, 34.9, 28.5 (3 carbons), 28.4 (3 carbons); HRMS (ES+) calcd for C<sub>25</sub>H<sub>39</sub>N<sub>4</sub>O<sub>7</sub>NaCl [M+Na]<sup>+</sup> 565.2405, found 565.2405.

**(S)-4-Chlorobenzyl 2-{2-[3,5-bis(*tert*-butoxycarbonylamino)pentanoyl]-1-methylhydrazinyl}acetate (16f)**

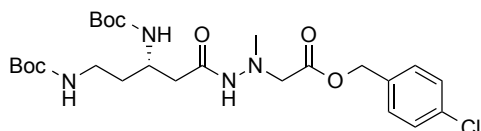

**16f** was prepared in the same manner as described for compound **16a** using **14b** (100 mg, 0.197 mmol) and *p*-chlorobenzyl alcohol (35.5 mg, 0.250 mmol).

**16f** (42.0 mg, 0.077 mmol, 2 steps 39%) was obtained as a white solid;  $[\alpha]_D^{25} = -30.6$  (*c* 0.85, CHCl<sub>3</sub>); m.p. 102.6-103.9 °C; <sup>1</sup>H NMR (400 MHz, CDCl<sub>3</sub>) δ 7.76 (s), 7.42-7.22 (m, total 5H), 5.72-5.51 (m, 1H), 5.42-5.06 (m, 3H), 4.06-3.86 (m, 1H), 3.79-3.50 (m, 2H), 3.46-3.28 (m, 1H), 3.03-2.85 (m, 1H), 2.85-2.46 (m, 4H), 2.46-2.34 (m) and 2.23 (dd, *J* = 15 and 5.8 Hz, total 1H), 1.75-1.54 (m, 2H), 1.54-1.28 (m, 18H); <sup>13</sup>C NMR (100 MHz, CDCl<sub>3</sub>) δ 170.4, 169.4, 156.2 (2 carbons), 134,6, 133.6, 129.9 (2 carbons), 128.9 (2 carbons), 79.3, 79.0, 65.9, 57.7, 45.5, 44.1, 38.9, 37.2, 34.8, 28.5 (3 carbons), 28.4 (3 carbons); HRMS (ES+) calcd for C<sub>25</sub>H<sub>40</sub>N<sub>4</sub>O<sub>7</sub>Cl [M+H]<sup>+</sup> 543.2586, found 543.2590.

**(S)-2-Nitrobenzyl 2-{2-[3,5-bis(*tert*-butoxycarbonylamino)pentanoyl]-1-methylhydrazinyl}acetate (16g)**

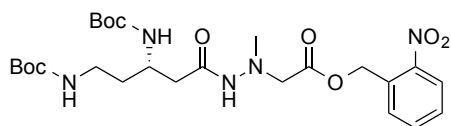

**16g** was prepared in the same manner as described for compound **16a** using **14b** (80.6 mg, 0.158 mmol) and *o*-nitrobenzyl alcohol (35.2 mg, 0.230 mmol).

**16g** (28.3 mg, 51.1 μmol, 2 steps 27%) was obtained as a white solid;  $[\alpha]_D^{25} = -33.0$  (*c* 1.40, CHCl<sub>3</sub>); m.p. 124.2-125.8 °C; <sup>1</sup>H NMR (400 MHz, CDCl<sub>3</sub>) δ 8.13 (d, *J* = 8.1 Hz, 1H), 7.79-7.63 (m) and 7.26 (br s, total 2H), 7.62-7.50 (m, 2H), 5.77-5.50 (m, 3H), 5.40-5.19 (m, 1H), 4.09-3.88 (m, 1H), 3.87-3.51 (m, 2H), 3.37 (br s, 1H), 3.03-2.48 (m, 5H), 2.42 (dd, *J* = 15 and 4.5 Hz) and 2.35 (dd, *J* = 15 and 6.0 Hz, total 1H), 1.77-1.54

(m, 2H), 1.43 (s, 18H);  $^{13}\text{C}$  NMR (100 MHz,  $\text{CDCl}_3$ )  $\delta$  170.0, 169.1, 156.2 (2 carbons), 147.7, 133.9, 131.1, 129.6, 129.3, 125.2, 79.3, 79.0, 63.4, 57.6, 45.4, 44.1, 39.0, 37.1, 34.9, 28.44 (3 carbons), 28.36 (3 carbons); HRMS (ES<sup>+</sup>) calcd for  $\text{C}_{25}\text{H}_{40}\text{N}_5\text{O}_9$   $[\text{M}+\text{H}]^+$  554.2826, found 554.2826.

**(S)-3-Nitrobenzyl 2-{2-[3,5-bis(*tert*-butoxycarbonylamino)pentanoyl]-1-methylhydrazinyl}acetate (**16h**)**

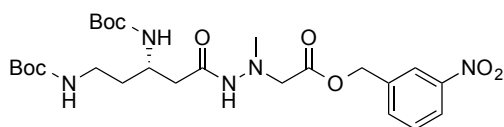

**16h** was prepared in the same manner as described for compound **16a** using **14b** (60.3 mg, 0.118 mmol) and *m*-nitrobenzyl alcohol (21.7 mg, 0.142 mmol).

**16h** (41.4 mg, 74.8  $\mu\text{mol}$ , 2 steps 63%) was obtained as a white solid;  $[\alpha]_{\text{D}}^{25} = -32.0$  (*c* 1.49,  $\text{CHCl}_3$ ); m.p. 86.9-87.8  $^{\circ}\text{C}$ ;  $^1\text{H}$  NMR (400 MHz,  $\text{CDCl}_3$ )  $\delta$  8.23 (s, 2H), 7.76 (s) and 7.25 (br s, total 1H), 7.70 (t,  $J = 7.5$  Hz, 1H), 7.59 (t,  $J = 7.9$  Hz, 1H), 5.71-5.52 (m, 1H), 5.40-5.18 (m, 3H), 4.06-3.85 (m, 1H), 3.84-3.57 (m, 2H), 3.36 (br s, 1H), 3.03-2.50 (m, 5H), 2.42 (dd,  $J = 15$  and 4.8 Hz) and 2.25 (dd,  $J = 15$  and 5.9 Hz, total 1H), 1.78-1.58 (m, 2H), 1.43 (s, 18H);  $^{13}\text{C}$  NMR (100 MHz,  $\text{CDCl}_3$ )  $\delta$  170.2, 169.3, 156.1 (2 carbons), 148.4, 137.1, 134.1, 129.8, 123.5, 123.1, 79.3, 79.0, 65.2, 57.7, 45.5, 44.1, 39.0, 37.1, 34.9, 28.44 (3 carbons), 28.35 (3 carbons); HRMS (ES<sup>+</sup>) calcd for  $\text{C}_{25}\text{H}_{40}\text{N}_5\text{O}_9$   $[\text{M}+\text{H}]^+$  554.2826, found 554.2817.

**(S)-4-Nitrobenzyl 2-{2-[3,5-bis(*tert*-butoxycarbonylamino)pentanoyl]-1-methylhydrazinyl}acetate (**16i**)**

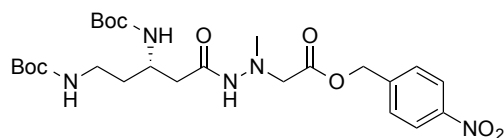

**16h** was prepared in the same manner as described for compound **16a** using **14b** (82.5 mg, 0.197 mmol) and *p*-nitrobenzyl alcohol (36.3 mg, 0.237 mmol).

**16h** (45.3 mg, 81.9  $\mu\text{mol}$ , 2 steps 42%) was obtained as a white solid;  $[\alpha]_{\text{D}}^{25} = -30.5$  (*c* 0.77,  $\text{CHCl}_3$ ); m.p. 98.7-100.5  $^{\circ}\text{C}$ ;  $^1\text{H}$  NMR (400 MHz,  $\text{CDCl}_3$ )  $\delta$  8.25 (d,  $J = 8.7$  Hz, 2H), 7.71 (s) and 7.23 (br d, total 1H), 7.53 (t,  $J = 8.5$  Hz, 2H), 5.74-5.48 (m, 1H), 5.40-5.17 (m, 3H), 4.08-3.84 (m, 1H), 3.83-3.75 (m, 2H), 3.36 (br s, 1H), 3.03-2.83 (m,

1H), 2.82-2.49 (m, 4H), 2.42 (dd,  $J = 16$  and 5.8 Hz) and 2.24 (dd,  $J = 15$  and 5.8 Hz, total 1H), 1.76-1.55 (m, 2H), 1.43 (s, 9H), 1.42 (s, 9H);  $^{13}\text{C}$  NMR (100 MHz,  $\text{CDCl}_3$ )  $\delta$  170.2, 169.3, 156.2 (2 carbons), 147.9, 142.3, 128.7 (2 carbons), 123.9 (2 carbons), 79.4, 79.1, 65.1, 57.7, 45.5, 44.1, 39.0, 37.1, 34.9, 28.45 (3 carbons), 28.37 (3 carbons); HRMS (ES+) calcd for  $\text{C}_{25}\text{H}_{28}\text{N}_5\text{O}_9\text{Na}$   $[\text{M}+\text{Na}]^+$  576.2645, found 576.2633.

**(S)-3-Methoxybenzyl 2-{2-[3,5-bis(*tert*-butoxycarbonylamino)pentanoyl]-1-methylhydrazinyl}acetate (16j)**

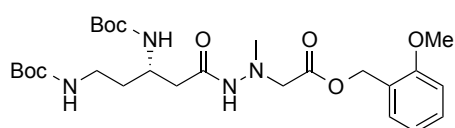

**16j** was prepared in the same manner as described for compound **16a** using **14b** (114 mg, 0.224 mmol) and *o*-methoxybenzyl alcohol (37.1 mg, 0.269 mmol).

**16j** (59.6 mg, 0.111 mmol, 2 steps 49%) was obtained as a white solid;  $[\alpha]_{\text{D}}^{25} = -38.0$  ( $c$  0.75,  $\text{CHCl}_3$ ); m.p. 77.1-79.0 °C;  $^1\text{H}$  NMR (400 MHz,  $\text{CDCl}_3$ )  $\delta$  7.80 (s) and 7.39-7.25 (m, total 3H), 7.04-6.86 (m, 2H), 5.77-5.56 (m, 1H), 5.39-5.17 (m, 3H), 4.05-3.89 (m, 1H), 3.86 (s, 3H), 3.78-3.50 (m, 2H), 3.37 (br s, 1H), 3.00-2.83 (m, 1H), 2.81-2.49 (m, 4H), 2.48-2.37 (m) and 2.20 (dd,  $J = 15$  and 5.6 Hz, total 1H), 1.78-1.57 (m, 2H), 1.43 (s, 18H);  $^{13}\text{C}$  NMR (100 MHz,  $\text{CDCl}_3$ )  $\delta$  174.7, 169.6, 157.7, 156.2, 130.4, 130.2, 123.3, 120.5, 110.6, 79.3, 79.0, 62.3, 59.0, 57.8, 55.5, 45.3, 44.0, 38.9, 37.1, 35.2, 28.4 (3 carbons), 28.3 (3 carbons); HRMS (ES+) calcd for  $\text{C}_{26}\text{H}_{43}\text{N}_4\text{O}_8$   $[\text{M}+\text{H}]^+$  539.3081, found 539.3079.

**(S)-3-Methoxybenzyl 2-{2-[3,5-bis(*tert*-butoxycarbonylamino)pentanoyl]-1-methylhydrazinyl}acetate (16k)**

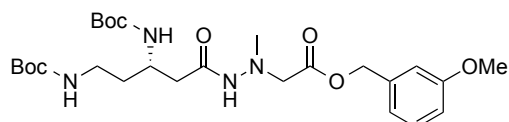

**16k** was prepared in the same manner as described for compound **16a** using **14b** (79.7 mg, 0.157 mmol) and *m*-methoxybenzyl alcohol (26.0 mg, 0.188 mmol).

**16k** (41.0 mg, 76.2  $\mu\text{mol}$ , 2 steps 49%) was obtained as a white solid;  $[\alpha]_{\text{D}}^{25} = -33.8$  ( $c$  0.94,  $\text{CHCl}_3$ ); m.p. 79.3-80.5 °C;  $^1\text{H}$  NMR (400 MHz,  $\text{CDCl}_3$ )  $\delta$  7.76 (s) and 7.36-7.25 (m, total 2H), 6.98-6.86 (m, 3H), 5.76-5.56 (m, 1H), 5.40-5.19 (m, 1H), 5.15 (s, 2H),

4.04-3.94 (m, 1H), 3.82 (s, 3H), 3.79-3.49 (m, 2H), 3.37 (br s, 1H), 3.02-2.88 (m, 1H), 2.87-2.48 (m, 4H), 2.47-2.38 (m) and 2.25 (dd,  $J = 15$  and  $5.7$  Hz, total 1H), 1.76-1.56 (m, 2H), 1.43 (s, 18H);  $^{13}\text{C}$  NMR (100 MHz,  $\text{CDCl}_3$ )  $\delta$  174.7, 169.5, 159.8, 156.2 (2 carbons), 136.5, 129.8, 120.6, 114.1, 114.0, 79.3, 79.0, 66.6, 57.7, 55.3, 45.4, 44.1, 38.9, 37.2, 34.9, 28.5 (3 carbons), 28.4 (3 carbons); HRMS (ES+) calcd for  $\text{C}_{26}\text{H}_{43}\text{N}_4\text{O}_8$   $[\text{M}+\text{H}]^+$  539.3081, found 539.3072.

**(S)-4-Methoxybenzyl 2-[2-[3,5-bis(*tert*-butoxycarbonylamino)pentanoyl]-1-methylhydrazinyl]acetate (16l)**

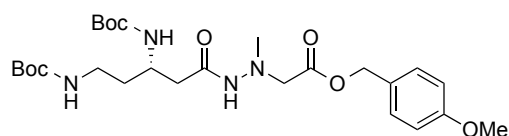

**16l** was prepared in the same manner as described for compound **16a** using **14b** (106 mg, 0.209 mmol) and *p*-methoxybenzyl alcohol (34.7 mg, 0.251 mmol).

**16l** (49.9 mg, 92.7  $\mu\text{mol}$ , 2 steps 44%) was obtained as a white solid;  $[\alpha]_{\text{D}}^{25} = -29.6$  ( $c$  0.15,  $\text{CHCl}_3$ ); m.p. 89.6-90.2  $^{\circ}\text{C}$ ;  $^1\text{H}$  NMR (400 MHz,  $\text{CDCl}_3$ )  $\delta$  7.81 (s) and 7.38-7.23 (m, total 3H), 6.90 (d,  $J = 7.2$  Hz, 2H), 5.74-5.57 (m, 1H), 5.41-5.23 (m, 1H), 5.11 (s, 2H), 4.06-3.85 (m, 1H), 3.81 (s, 3H), 3.78-3.46 (m, 2H), 3.37 (br s, 1H), 3.00-2.86 (m, 1H), 2.85-2.45 (m, 4H), 2.44-2.37 (m) and 2.22 (dd,  $J = 15$  and  $5.7$  Hz, total 1H), 1.76-1.56 (m, 2H), 1.43 (s, 18H);  $^{13}\text{C}$  NMR (100 MHz,  $\text{CDCl}_3$ )  $\delta$  174.7, 169.6, 159.9, 156.1, 130.4 (2 carbons), 127.1, 114.0 (2 carbons), 79.2, 78.9, 66.6, 57.7, 55.3, 45.4, 44.0, 38.9, 37.1, 34.7, 28.44 (3 carbons), 28.35 (3 carbons); HRMS (ES+) calcd for  $\text{C}_{26}\text{H}_{42}\text{N}_4\text{O}_8\text{Na}$   $[\text{M}+\text{Na}]^+$  561.2900, found 561.2889.

**(S)-2-Bromobenzyl 2-[2-(3,5-diaminopentanoyl)-1-methylhydrazinyl]acetate·2TFA (17a)**

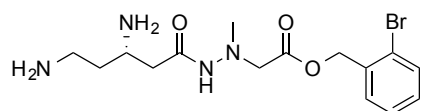

**17a** was prepared in the same manner as described for compound **9b** using **16a** (52.0 mg, 88.5  $\mu\text{mol}$ ). The residue was purified by preparative HPLC (gradient: milli-Q water (TFA 0.1%) :  $\text{CH}_3\text{CN}$  (TFA 0.1%) = 75 : 25 to milli-Q water (TFA 0.1%) :  $\text{CH}_3\text{CN}$  (TFA 0.1%) = 55 : 45 over 40 min, flow rate 5 mL/min, UV: 222 nm).

**17a** (26.9 mg, 43.9  $\mu\text{mol}$ , 50%) was obtained as a white solid;  $[\alpha]_{\text{D}}^{25} = +4.87$  ( $c$  0.10,

H<sub>2</sub>O); m.p. 84.7-85.8 °C; <sup>1</sup>H NMR (400 MHz, D<sub>2</sub>O) δ 7.73 (d, *J* = 8.0 Hz, 1H), 7.57-7.43 (m, 2H), 7.40-7.37 (m, 1H), 5.33 (s, 2H), 3.82-3.69 (m, 3H), 3.16 (t, *J* = 7.3 Hz, 2H), 2.71 (s, 3H), 2.70-2.55 (m, 2H), 2.22-2.01 (m, 2H); <sup>13</sup>C NMR (100 MHz, D<sub>2</sub>O) δ 170.6, 168.8, 134.2, 133.0, 130.9, 130.7, 128.0, 123.3, 66.9, 58.3, 46.1, 44.3, 35.7, 34.6, 29.8; HRMS (ES<sup>+</sup>) calcd for C<sub>15</sub>H<sub>24</sub>N<sub>4</sub>O<sub>3</sub>Br [M+H]<sup>+</sup> 387.1032, found 387.1033.

**(S)-3-Bromobenzyl 2-[2-(3,5-diaminopentanoyl)-1-methylhydrazinyl]acetate·2TFA (17b)**

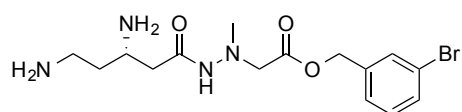

**17b** was prepared in the same manner as described for compound **17a** using **16b** (44.9 mg, 76.4 μmol).

**17b** (10.7 mg, 17.3 μmol, 23%) was obtained as a white solid; [α]<sub>D</sub><sup>25</sup> = +8.08 (*c* 0.77, D<sub>2</sub>O); m.p. 102.4-103.0 °C; <sup>1</sup>H NMR (400 MHz, D<sub>2</sub>O) δ 7.70-7.57 (m, 2H), 7.44-7.32 (m, 3H), 5.20 (s, 2H), 3.79-3.64 (m, 3H), 3.10 (t, *J* = 7.5 Hz, 2H), 2.67 (s, 3H), 2.62-2.45 (m, 2H), 2.18-1.98 (m, 2H); <sup>13</sup>C NMR (100 MHz, D<sub>2</sub>O) δ 170.6, 168.8, 137.7, 131.5, 130.9, 130.5, 127.0, 121.9, 66.2, 58.4, 46.0, 44.3, 35.6, 34.5, 29.8; HRMS (ES<sup>+</sup>) calcd for C<sub>15</sub>H<sub>24</sub>N<sub>4</sub>O<sub>3</sub>Br [M+H]<sup>+</sup> 387.1032, found 387.1035.

**(S)-4-Bromobenzyl 2-[2-(3,5-diaminopentanoyl)-1-methylhydrazinyl]acetate·2TFA (17c)**

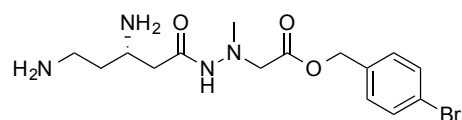

**17c** was prepared in the same manner as described for compound **17a** using **16c** (37.2 mg, 63.3 μmol).

**17c** (18.4 mg, 29.9 μmol, 47%) was obtained as a white solid; [α]<sub>D</sub><sup>25</sup> = +6.67 (*c* 0.50, H<sub>2</sub>O); m.p. 88.5-89.4 °C; <sup>1</sup>H NMR (400 MHz, D<sub>2</sub>O) δ 7.59 (d, *J* = 8.4 Hz, 2H), 7.33 (d, *J* = 8.2 Hz, 2H), 5.16 (s, 2H), 3.74-3.62 (m, 3H), 3.09 (t, *J* = 8.3 Hz, 2H), 2.65 (s, 3H), 2.60-2.45 (m, 2H), 2.20-1.98 (m, 2H); <sup>13</sup>C NMR (100 MHz, D<sub>2</sub>O) δ 173.5, 171.7, 137.4, 134.6 (2 carbons), 133.1 (2 carbons), 124.9, 69.3, 61.4, 48.9, 47.2, 38.6, 37.5, 32.7; HRMS (ES<sup>+</sup>) calcd for C<sub>15</sub>H<sub>24</sub>N<sub>4</sub>O<sub>3</sub>Br [M+H]<sup>+</sup> 387.1032, found 387.1024.



**(S)-2-Chlorobenzyl 2-[2-(3,5-diaminopentanoyl)-1-methylhydrazinyl]acetate·2TFA  
(17d)**

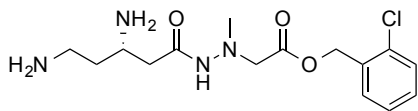

**17d** was prepared in the same manner as described for compound **17a** using **16d** (37.2 mg, 68.5  $\mu\text{mol}$ ).

**17d** (35.1 mg, 61.6  $\mu\text{mol}$ , 90%) was obtained as a white solid;  $[\alpha]_{\text{D}}^{25} = +4.99$  ( $c$  1.00,  $\text{H}_2\text{O}$ ); m.p. 78.5-79.5  $^{\circ}\text{C}$ ;  $^1\text{H}$  NMR (400 MHz,  $\text{D}_2\text{O}$ )  $\delta$  7.53-7.44 (m, 2H), 7.44-7.32 (m, 2H), 5.30 (s, 2H), 3.80-3.60 (m, 3H), 3.09 (t,  $J = 8.9$  Hz, 2H), 2.64 (s, 3H), 2.61-2.39 (m, 2H), 2.15-1.96 (m, 2H);  $^{13}\text{C}$  NMR (100 MHz,  $\text{D}_2\text{O}$ )  $\delta$  170.5, 168.8, 133.5, 132.5, 130.8, 130.4, 129.7, 127.3, 64.7, 58.3, 46.0, 44.2, 35.6, 34.5, 29.7; HRMS (ES+) calcd for  $\text{C}_{15}\text{H}_{24}\text{N}_4\text{O}_3\text{Cl}$   $[\text{M}+\text{H}]^+$  343.1537, found 343.1535.

**(S)-3-Chlorobenzyl 2-[2-(3,5-diaminopentanoyl)-1-methylhydrazinyl]acetate·2TFA  
(17e)**

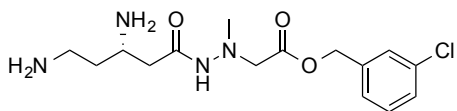

**17e** was prepared in the same manner as described for compound **17a** using **16e** (24.4 mg, 45.0  $\mu\text{mol}$ ).

**17e** (14.0 mg, 24.5  $\mu\text{mol}$ , 54%) was obtained as a white solid;  $[\alpha]_{\text{D}}^{25} = +5.27$  ( $c$  1.00,  $\text{H}_2\text{O}$ ); m.p. 69.9-70.8  $^{\circ}\text{C}$ ;  $^1\text{H}$  NMR (400 MHz,  $\text{D}_2\text{O}$ )  $\delta$  7.45-7.31 (m, 4H), 5.18 (s, 2H), 3.76-3.60 (m, 3H), 3.08 (t,  $J = 8.6$  Hz, 2H), 2.65 (s, 3H), 2.60-2.45 (m, 2H), 2.13-1.95 (m, 2H);  $^{13}\text{C}$  NMR (100 MHz,  $\text{D}_2\text{O}$ )  $\delta$  170.6, 168.8, 137.4, 133.8, 130.2, 128.5, 128.0, 126.5, 66.2, 58.4, 46.0, 44.3, 35.6, 34.5, 29.7; HRMS (ES+) calcd for  $\text{C}_{15}\text{H}_{24}\text{N}_4\text{O}_3\text{Cl}$   $[\text{M}+\text{H}]^+$  343.1537, found 343.1535.

**(S)-4-Chlorobenzyl 2-[2-(3,5-diaminopentanoyl)-1-methylhydrazinyl]acetate·2TFA  
(17f)**

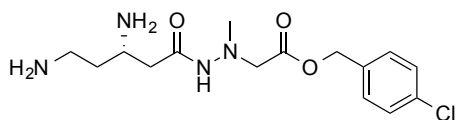

**17f** was prepared in the same manner as described for compound **17a** using **16f** (22.6 mg, 41.7  $\mu\text{mol}$ ).

**17f** (13.1 mg, 23.0  $\mu\text{mol}$ , 55%) was obtained as a white solid;  $[\alpha]_{\text{D}}^{25} = +2.52$  ( $c$  0.50,  $\text{H}_2\text{O}$ ); m.p. 72.1-73.2  $^{\circ}\text{C}$ ;  $^1\text{H}$  NMR (400 MHz,  $\text{D}_2\text{O}$ )  $\delta$  7.47-7.30 (m, 4H), 5.17 (s, 2H), 3.80-3.55 (m, 3H), 3.08 (t,  $J = 8.7$  Hz, 2H), 2.63 (s, 3H), 2.59-2.40 (m, 2H), 2.15-1.92 (m, 2H);  $^{13}\text{C}$  NMR (100 MHz,  $\text{D}_2\text{O}$ )  $\delta$  170.6, 168.8, 134.0, 133.8, 129.9 (2 carbons), 128.7 (2 carbons), 66.4, 58.4, 46.0, 44.2, 35.6, 34.5, 29.7; HRMS (ES+) calcd for  $\text{C}_{15}\text{H}_{24}\text{N}_4\text{O}_3\text{Cl}$   $[\text{M}+\text{H}]^+$  343.1537, found 343.1534.

**(S)-2-Nitrobenzyl 2-[2-(3,5-diaminopentanoyl)-1-methylhydrazinyl]acetate·2TFA (17g)**

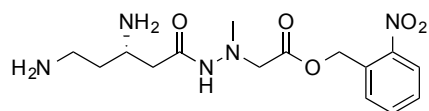

**17g** was prepared in the same manner as described for compound **17a** using **16g** (28.3 mg, 51.1  $\mu\text{mol}$ ).

**17g** (21.8 mg, 37.5  $\mu\text{mol}$ , 74%) was obtained as a white solid;  $[\alpha]_{\text{D}}^{25} = +6.10$  ( $c$  0.50,  $\text{H}_2\text{O}$ ); m.p. 79.9-80.4  $^{\circ}\text{C}$ ;  $^1\text{H}$  NMR (400 MHz,  $\text{D}_2\text{O}$ )  $\delta$  8.15 (d,  $J = 7.3$  Hz, 1H), 7.75 (t,  $J = 7.5$  Hz, 1H), 7.69-7.58 (m, 2H), 5.52 (s, 2H), 3.79-3.68 (m, 3H), 3.11 (t,  $J = 7.7$  Hz, 2H), 2.65 (s, 3H), 2.62 (m, 2H), 2.13-1.99 (m, 2H);  $^{13}\text{C}$  NMR (100 MHz,  $\text{D}_2\text{O}$ )  $\delta$  173.3, 171.9, 150.3, 137.4, 133.34, 133.27, 132.6, 128.2, 67.0, 61.2, 49.0, 47.2, 38.6, 37.6, 32.7; HRMS (ES+) calcd for  $\text{C}_{15}\text{H}_{24}\text{N}_5\text{O}_5$   $[\text{M}+\text{H}]^+$  354.1777, found 354.1782.

**(S)-3-Nitrobenzyl 2-[2-(3,5-diaminopentanoyl)-1-methylhydrazinyl]acetate·2TFA (17h)**

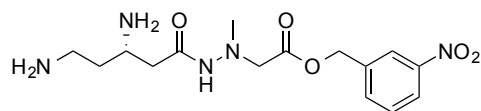

**17h** was prepared in the same manner as described for compound **17a** using **16h** (36.9 mg, 66.6  $\mu\text{mol}$ ).

**17h** (21.6 mg, 37.2  $\mu\text{mol}$ , 56%) was obtained as a white solid;  $[\alpha]_{\text{D}}^{25} = +6.49$  ( $c$  0.50,  $\text{H}_2\text{O}$ ); m.p. 76.0-76.7  $^{\circ}\text{C}$ ;  $^1\text{H}$  NMR (400 MHz,  $\text{D}_2\text{O}$ )  $\delta$  8.25 (s, 1H), 8.21 (d,  $J = 8.3$  Hz, 1H), 7.80 (d,  $J = 7.7$  Hz, 1H), 7.62 (t,  $J = 8.0$  Hz, 1H), 5.30 (s, 2H), 3.79-3.63 (m, 3H),

3.11 (t,  $J = 7.3$  Hz, 2H), 2.66 (s, 3H), 2.60 (dd,  $J = 17$  and 5.3 Hz) and 2.53 (dd,  $J = 17$  and 7.5 Hz, total 2H), 2.18-1.97 (m, 2H);  $^{13}\text{C}$  NMR (100 MHz,  $\text{D}_2\text{O}$ )  $\delta$  173.5, 171.8, 150.8, 140.1, 137.6, 132.8, 126.3, 125.7, 68.7, 61.3, 49.0, 47.2, 38.6, 37.6, 32.8; HRMS (ES+) calcd for  $\text{C}_{15}\text{H}_{24}\text{N}_5\text{O}_5$   $[\text{M}+\text{H}]^+$  354.1777, found 354.1773.

**(S)-4-Nitrobenzyl 2-[2-(3,5-diaminopentanoyl)-1-methylhydrazinyl]acetate·2TFA (17i)**

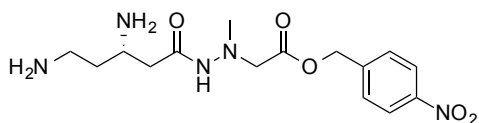

**17i** was prepared in the same manner as described for compound **17a** using **16i** (22.1 mg, 39.9  $\mu\text{mol}$ ).

**17i** (15.7 mg, 27.0  $\mu\text{mol}$ , 68%) was obtained as a white solid;  $[\alpha]_{\text{D}}^{25} = +3.72$  ( $c$  0.50,  $\text{H}_2\text{O}$ ); m.p. 52.6-53.0  $^{\circ}\text{C}$ ;  $^1\text{H}$  NMR (400 MHz,  $\text{D}_2\text{O}$ )  $\delta$  8.24 (d,  $J = 8.7$  Hz, 2H), 7.60 (d,  $J = 8.7$  Hz, 2H), 5.30 (s, 2H), 3.80-3.61 (m, 3H), 3.09 (t,  $J = 7.3$  Hz, 2H), 2.65 (s, 3H), 2.59 (dd,  $J = 16$  and 5.3 Hz) and 2.52 (dd,  $J = 17$  and 7.4 Hz, total 2H), 2.15-1.98 (m, 2H);  $^{13}\text{C}$  NMR (100 MHz,  $\text{D}_2\text{O}$ )  $\delta$  173.4, 171.9, 150.3, 145.9, 131.5 (2 carbons), 126.7 (2 carbons), 68.7, 61.2, 48.9, 47.2, 38.6, 37.8, 32.8; HRMS (ES+) calcd for  $\text{C}_{15}\text{H}_{24}\text{N}_5\text{O}_5$   $[\text{M}+\text{H}]^+$  354.1777, found 354.1771.

**(S)-2-Methoxybenzyl**

**2-[2-(3,5-diaminopentanoyl)-1-methylhydrazinyl]acetate·2TFA (17j)**

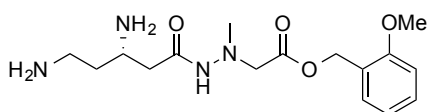

**17j** was prepared in the same manner as described for compound **17a** using **16j** (30.4 mg, 56.5  $\mu\text{mol}$ ).

**17j** (20.8 mg, 36.8  $\mu\text{mol}$ , 65%) was obtained as a white solid;  $[\alpha]_{\text{D}}^{25} = +2.35$  ( $c$  1.00,  $\text{H}_2\text{O}$ ); m.p. 66.5-66.8  $^{\circ}\text{C}$ ;  $^1\text{H}$  NMR (400 MHz,  $\text{D}_2\text{O}$ )  $\delta$  7.46-7.35 (m, 2H), 7.10 (d,  $J = 8.3$  Hz, 1H), 7.03 (t,  $J = 6.9$  Hz, 1H), 5.22 (s, 2H), 3.85 (s, 3H), 3.70-3.60 (m, 3H), 3.08 (t,  $J = 7.2$  Hz, 2H), 2.63 (s, 3H), 2.59-2.46 (m, 2H), 2.18-1.97 (m, 2H);  $^{13}\text{C}$  NMR (100 MHz,  $\text{D}_2\text{O}$ )  $\delta$  173.6, 171.8, 160.4, 133.7, 133.5, 126.0, 123.8, 114.6, 65.8, 61.2, 58.6, 48.9, 47.0, 38.6, 37.6, 32.7; HRMS (ES+) calcd for  $\text{C}_{16}\text{H}_{27}\text{N}_4\text{O}_4$   $[\text{M}+\text{H}]^+$  339.2032,

found 339.2025.

### (S)-3-Methoxybenzyl

#### 2-[2-(3,5-diaminopentanoyl)-1-methylhydrazinyl]acetate·2TFA (17k)

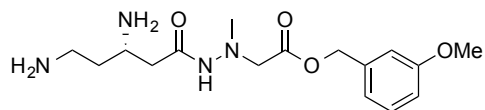

**17k** was prepared in the same manner as described for compound **17a** using **16k** (22.1 mg, 41.1  $\mu\text{mol}$ ).

**17k** (15.0 mg, 26.5  $\mu\text{mol}$ , 64%) was obtained as a white solid;  $[\alpha]_{\text{D}}^{25} = +8.44$  ( $c$  0.43,  $\text{H}_2\text{O}$ ); m.p. 58.1-58.6  $^{\circ}\text{C}$ ;  $^1\text{H}$  NMR (400 MHz,  $\text{D}_2\text{O}$ ) 7.38 (t,  $J = 19$  Hz, 1H), 7.05-6.99 (m, 3H), 5.18 (s, 2H), 3.83 (s, 3H), 3.68 (s) and 3.67-3.65 (m, total 3H), 3.08 (t,  $J = 18$  Hz, 2H), 2.64 (s, 3H), 2.58-2.46 (m, 2H), 2.08-1.99 (m, 2H);  $^{13}\text{C}$  NMR (100 MHz,  $\text{D}_2\text{O}$ )  $\delta$  170.6, 168.8, 159.0, 137.0, 130.1, 120.9, 114.2, 113.8, 66.9, 58.4, 55.4, 46.0, 44.2, 35.6, 34.6, 29.8; HRMS (ES+) calcd for  $\text{C}_{16}\text{H}_{27}\text{N}_4\text{O}_4$   $[\text{M}+\text{H}]^+$  339.2032, found 339.2021.

### (S)-4-Methoxybenzyl

#### 2-[2-(3,5-diaminopentanoyl)-1-methylhydrazinyl]acetate·2TFA (17l)

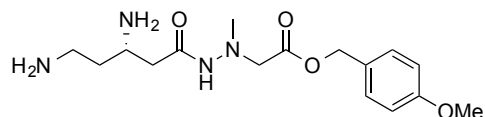

**17l** was prepared in the same manner as described for compound **17a** using **16k** (30.8 mg, 57.2  $\mu\text{mol}$ ).

**17l** (18.2 mg, 32.1  $\mu\text{mol}$ , 56%) was obtained as a white solid;  $[\alpha]_{\text{D}}^{25} = +0.25$  ( $c$  0.50,  $\text{H}_2\text{O}$ ); m.p. 71.0-72.1  $^{\circ}\text{C}$ ;  $^1\text{H}$  NMR (400 MHz,  $\text{D}_2\text{O}$ )  $\delta$  7.50 (d,  $J = 8.7$  Hz, 2H), 7.02 (d,  $J = 8.7$  Hz, 2H), 5.15 (s, 2H), 2.84 (s, 3H), 3.73-3.61 (m, 3H), 3.09 (t,  $J = 7.5$  Hz, 2H), 2.64 (s, 3H), 2.55-2.49 (m, 2H), 2.15-1.94 (m, 2H);  $^{13}\text{C}$  NMR (100 MHz,  $\text{D}_2\text{O}$ )  $\delta$  170.7, 168.8, 159.1, 130.4 (2 carbons), 127.8, 114.2 (2 carbons), 66.9, 58.4, 55.4, 46.0, 44.2, 35.6, 34.5, 29.7; HRMS (ES+) calcd for  $\text{C}_{16}\text{H}_{27}\text{N}_4\text{O}_4$   $[\text{M}+\text{H}]^+$  339.2032, found 339.2036.

## 6. Biological evaluation

### 6-1. Chemicals

Geneticin (G418) solution was purchased from Roche Diagnostics K.K., Swizerland.

### 6-2. Plasmid

The previously reported plasmids<sup>1</sup> were used in this study. The dual-reporter plasmid for mammalian cells expression encodes the  $\beta$ -galactosidase and luciferase genes connected with the premature termination codon (PTC), a 27-mer stretch of DNA that contains the sequence surrounding the PTC in exon 23 of the *mdx* gene for mouse dystrophin: TTGAAAGAGCAATAAAAATGGCTTCAAC. The PTC was originally TAA. We used TGA in this study.

The *in vitro* eukaryotic expression study involved the insertion of the  $\beta$ -galactosidase-TGA-luciferase fragment downstream of the IRES sequence of the pT7CFE1-CGST-HA-His vector (Thermo Fisher Scientific).

### 6-3. The cell-based readthrough activity evaluation

The cell-based readthrough activity was evaluated by previously reported procedure<sup>1</sup>.

COS-7 cells were maintained in D-MEM (high glucose, Wako Pure Chemical Industries, Ltd., Japan) containing 10% fetal bovine serum (FBS, Nichirei Biosciences Inc., Japan) at 37 °C in a humidified 5% CO<sub>2</sub> atmosphere. Cells were plated in 96-well plates at 8000 cells/well. After incubation at 37 °C for 12 h, cells were transfected with a plasmid with PTC using the FuGene<sup>®</sup> HD Transfect reagent (Roche Diagnostics K.K., Swizerland). The medium was removed from the well, and the medium containing the compounds at a concentration of 50-200  $\mu$ M were added to the well. As a control, the medium without compounds was also added. The cells were incubated at 37 °C for 48 h, cells were collected, and  $\beta$ -galactosidase activity in the cell lysates was measured according to the manufacturer's protocol for the  $\beta$ -Galactosidase Enzyme Assay with Reporter Lysis Buffer (Promega KK, USA). The  $\beta$ -galactosidase activity was measured by TECAN SAFIRE (TECAN Japan Co., Ltd, Japan) at 420 nm (reference 0 nm). The luciferase activity in the cell lysates was measured according to the manufacturer's protocol for using the PicaGene<sup>®</sup> BrilliantStar-LT (TOYO INK CO., LTD., Japan). The luciferase activity was measured using a Berthold Luminometer MicroLumat Plus LB96V (Berthold Japan K.K., Japan). The readthrough activity was determined as the

ratio of luciferase activity to  $\beta$ -galactosidase activity. The activities of compounds were expressed as a ratio relative to control (=1).

#### 6-4. The readthrough activity evaluation of cell-free protein synthesis system

The cell-free readthrough activity was evaluated by previously reported procedure<sup>1</sup>.

The readthrough activity of the cell-free protein synthesis system was evaluated according to the manufacturer's protocol for the Human Cell-Free Protein Expression System (TAKARA Bio Inc, Japan). Compounds (final concentration, 20  $\mu$ M) were added to the lysate before incubation at 37 °C for 3 h. The  $\beta$ -galactosidase and luciferase activities were measured in the same way as in the cell-based assay, as described above.

#### 6-5. The antimicrobial activity assay (MIC assay)

The antimicrobial activity assay of **9b** was evaluated at Hygiene & Microbiology Research Center. As a bacterial strain, *Staphylococcus aureus* NBRC13276, *Escherichia coli* NBRC3972 were used.

#### 6-6. Hydrolysis of benzyl ester of **17e** by porcine liver esterase

The stock solution of **17e** (20 mM in 100 mM phosphate buffer, pH 7.4) was diluted to 2 mM with 100 mM phosphate buffer (pH 7.4). The suspension of the porcine liver esterase (9  $\mu$ L; containing 110  $\mu$ unit/mL; PLE: carboxylic-ester hydrolase, Aldrich, USA) was added to the solution of **17e** (2 mM, 450  $\mu$ L). The residual solution of **17e** (2 mM, 50  $\mu$ L) was used as a sample of time zero without addition of esterase. Each solution (2 mM, 50  $\mu$ L) containing PLE was incubated at 37 °C for appropriate times. After the incubation, the mixture was filtered through the centrifugal filter (0.2  $\mu$ m filter unit, NANOSEP<sup>®</sup> MF centrifugal devices, PALL) and immediately frozen at -78 °C to neutralize a PLE. After melting, the filtrate containing **17e** and its metabolites were analyzed by RP-HPLC and high-resolution mass spectrometry for identification of some metabolites appeared as a new HPLC peak.

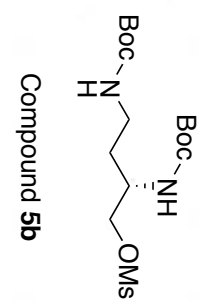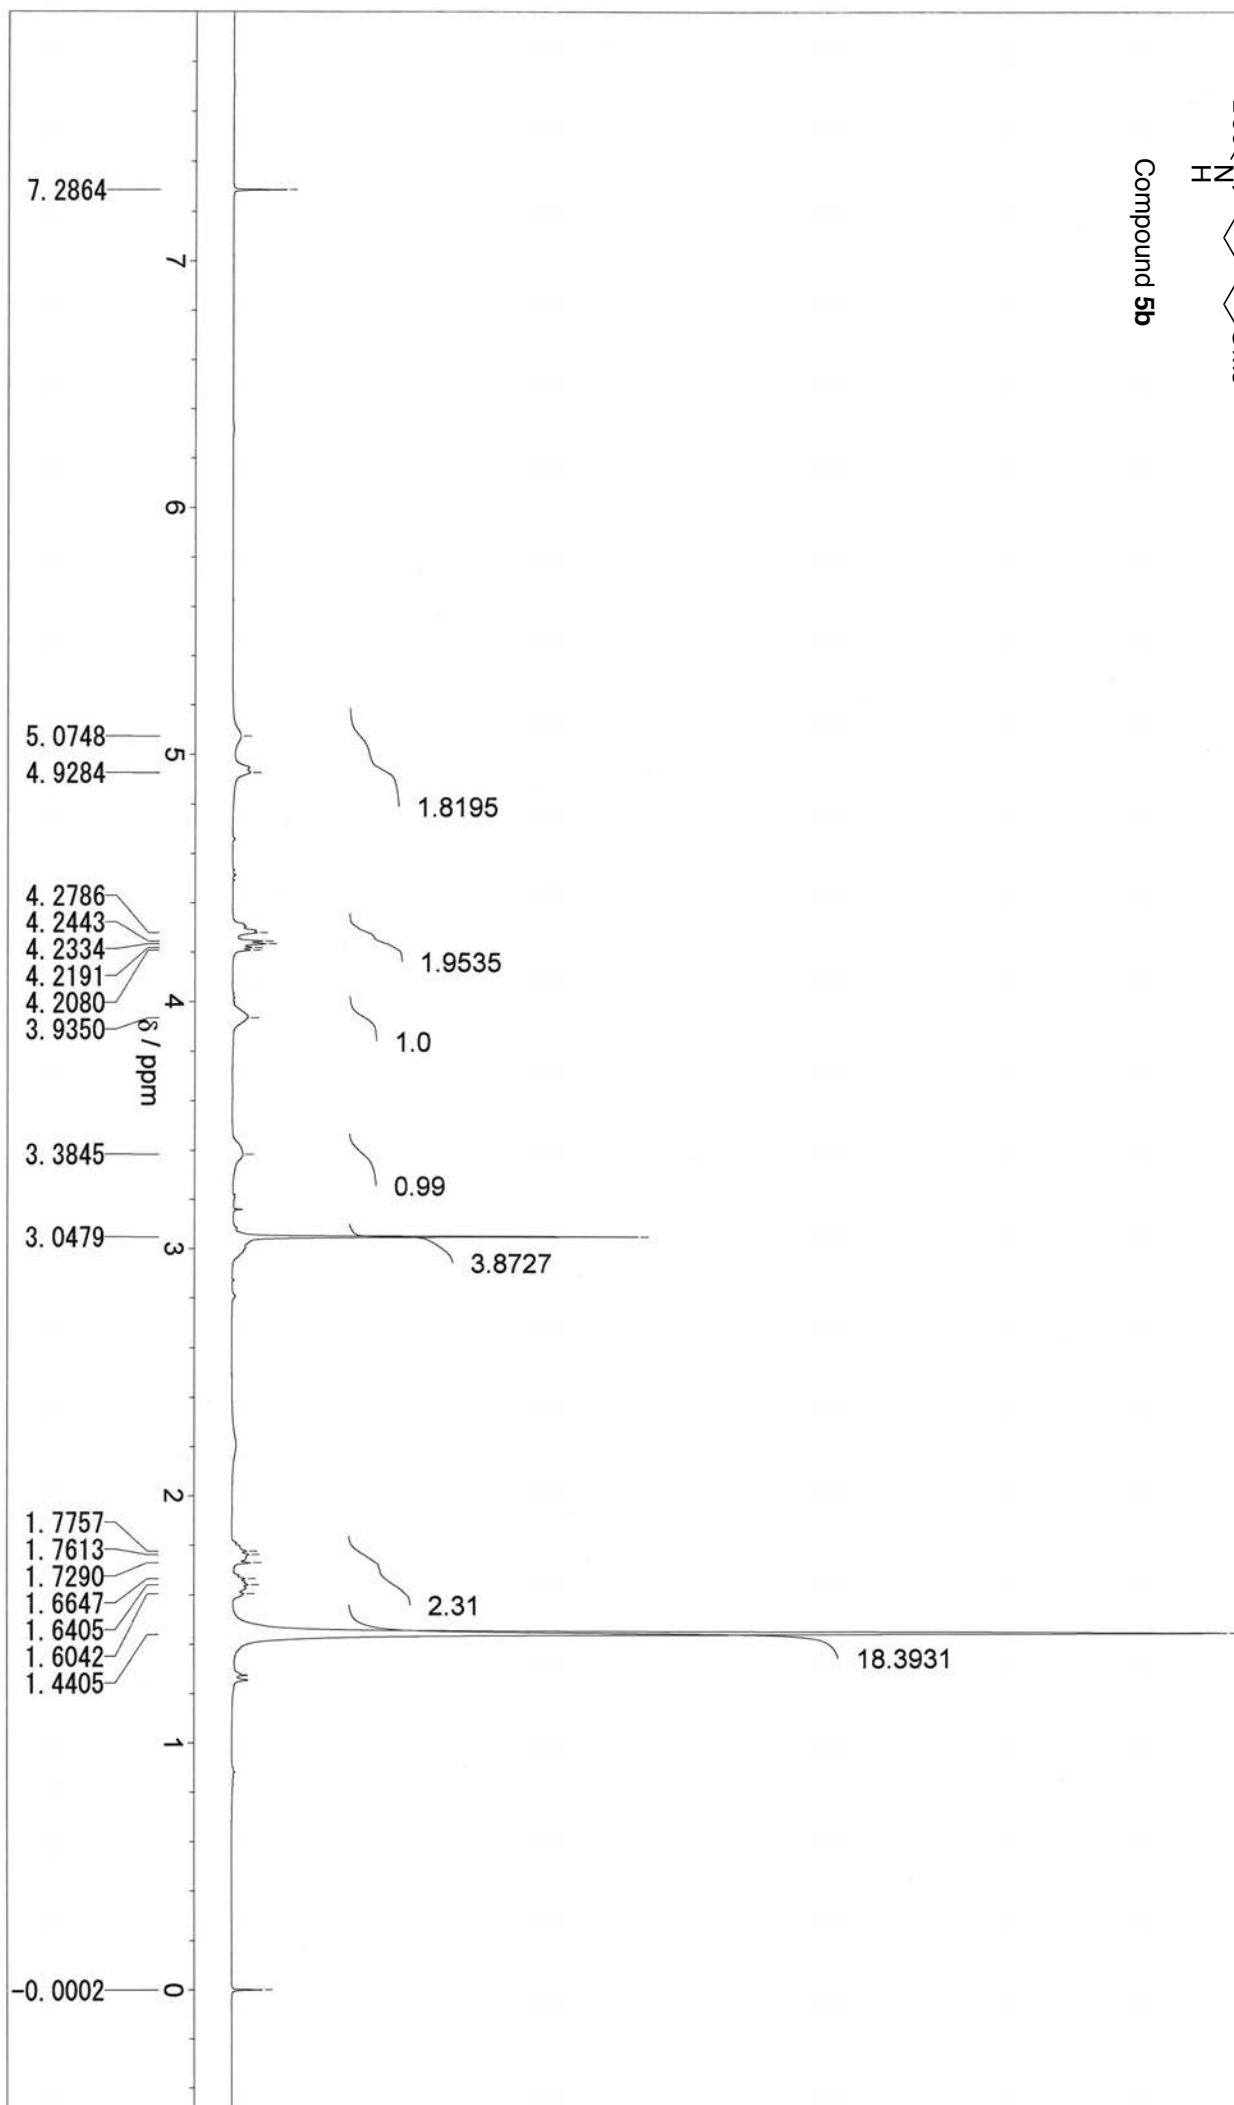

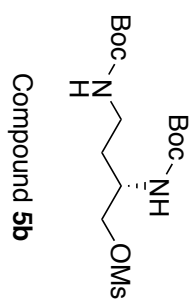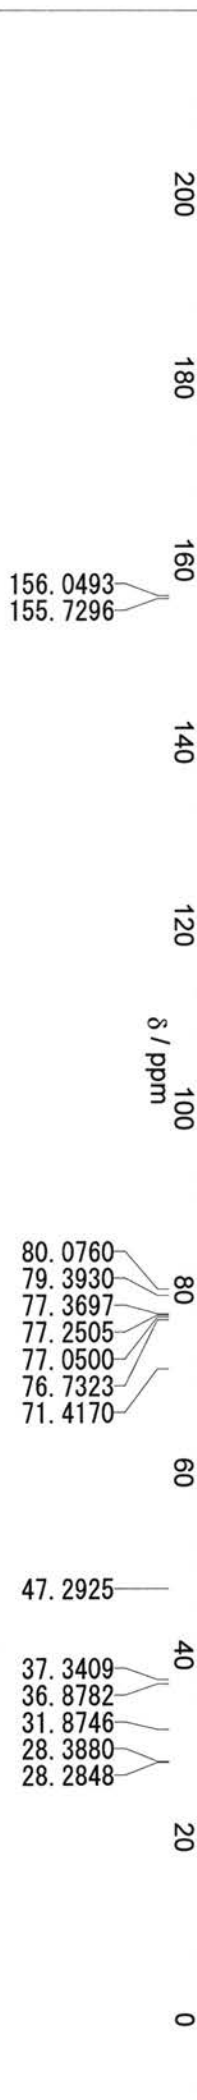



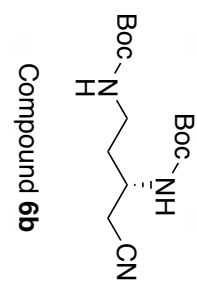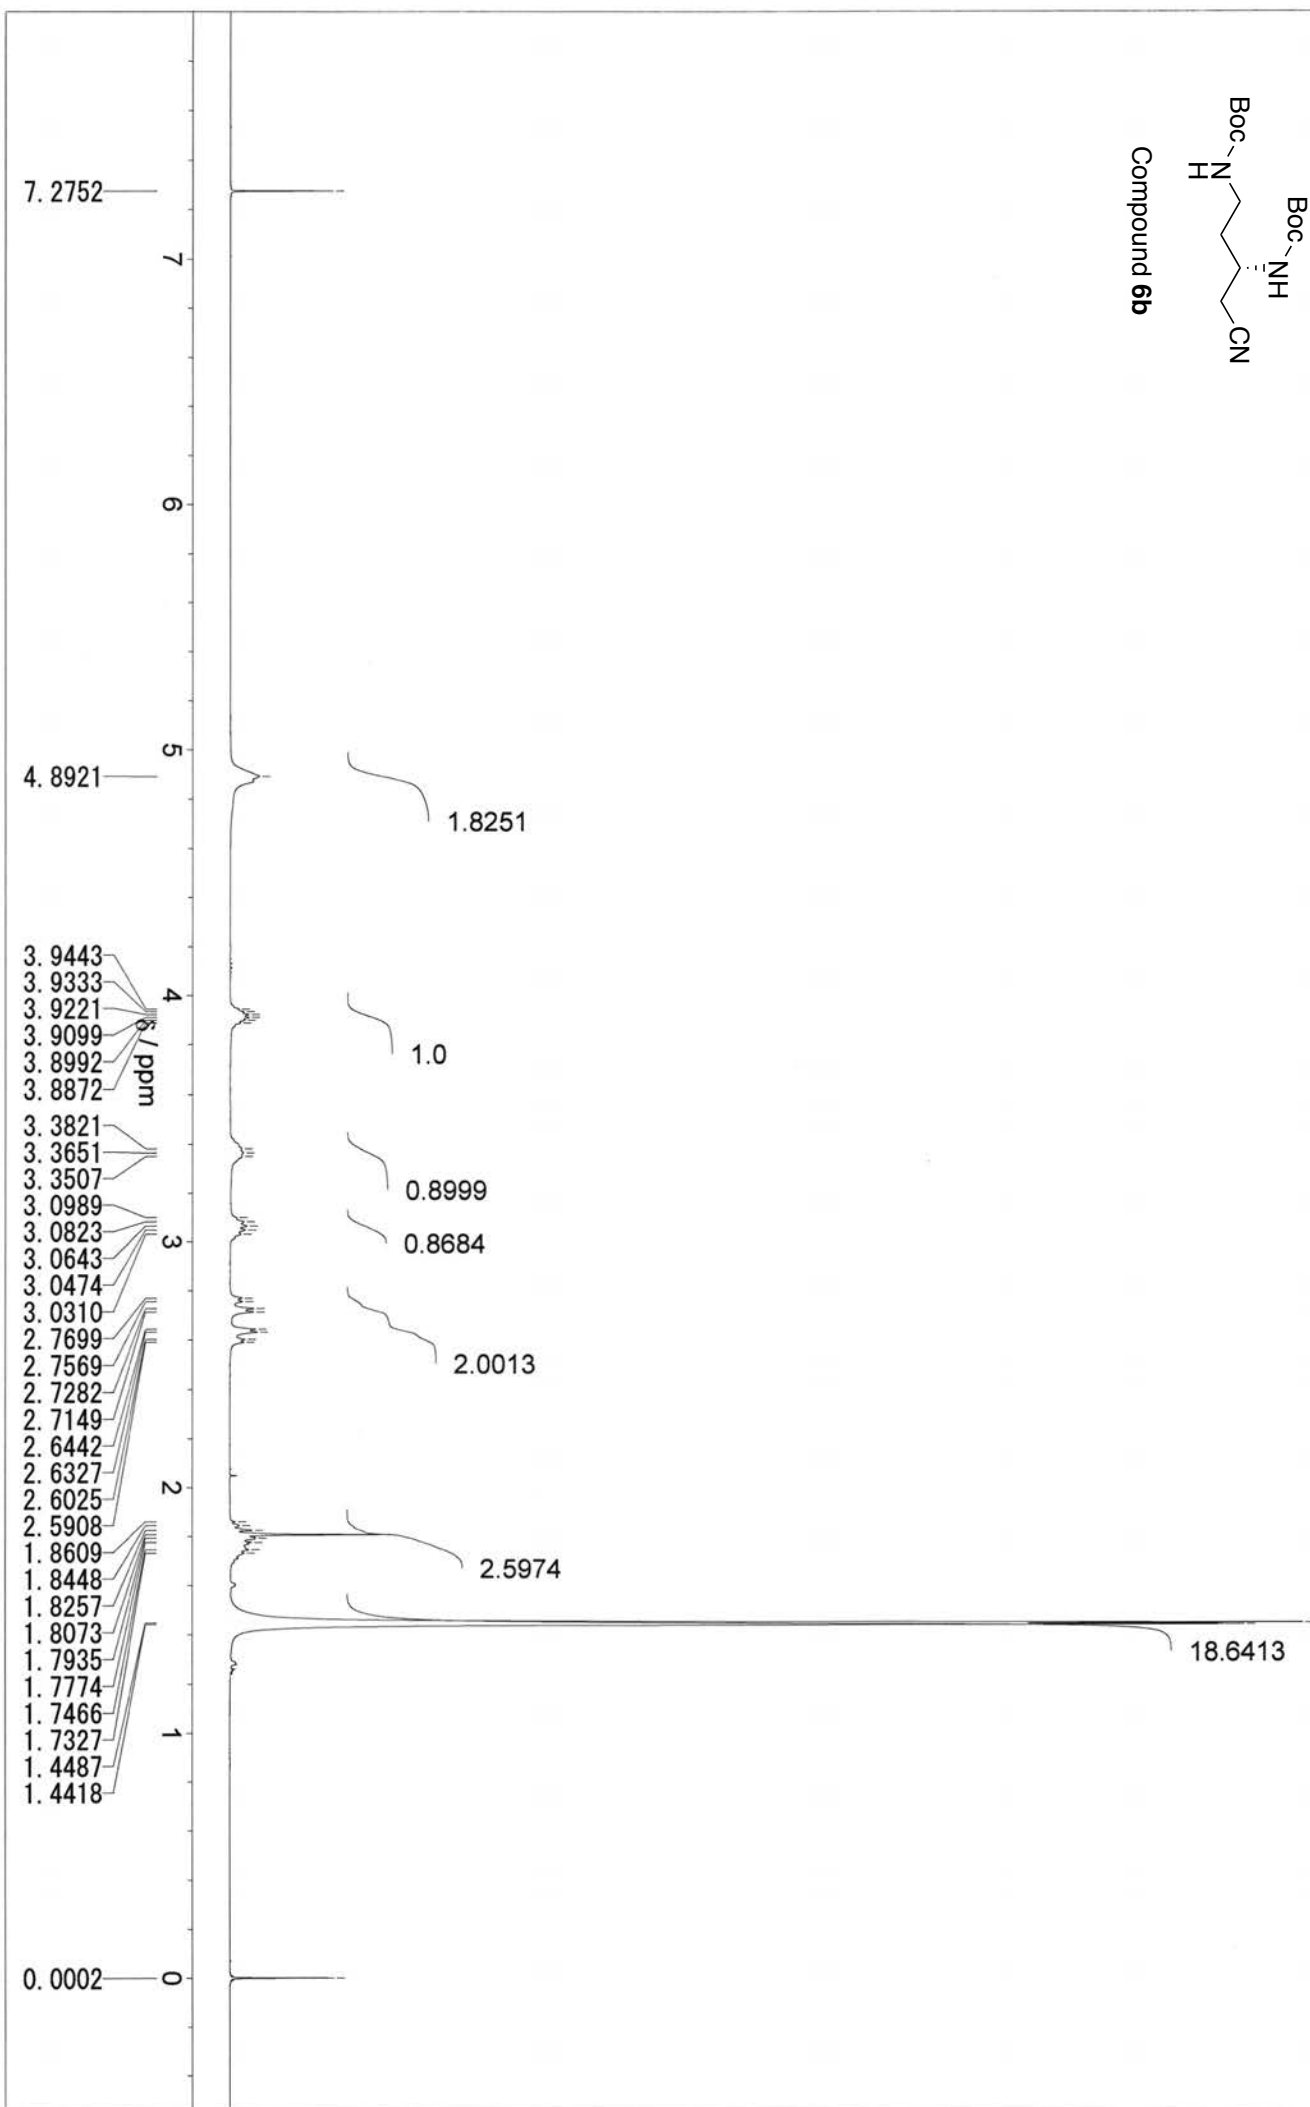

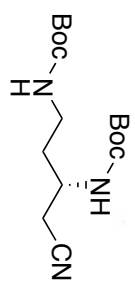

Compound 6b

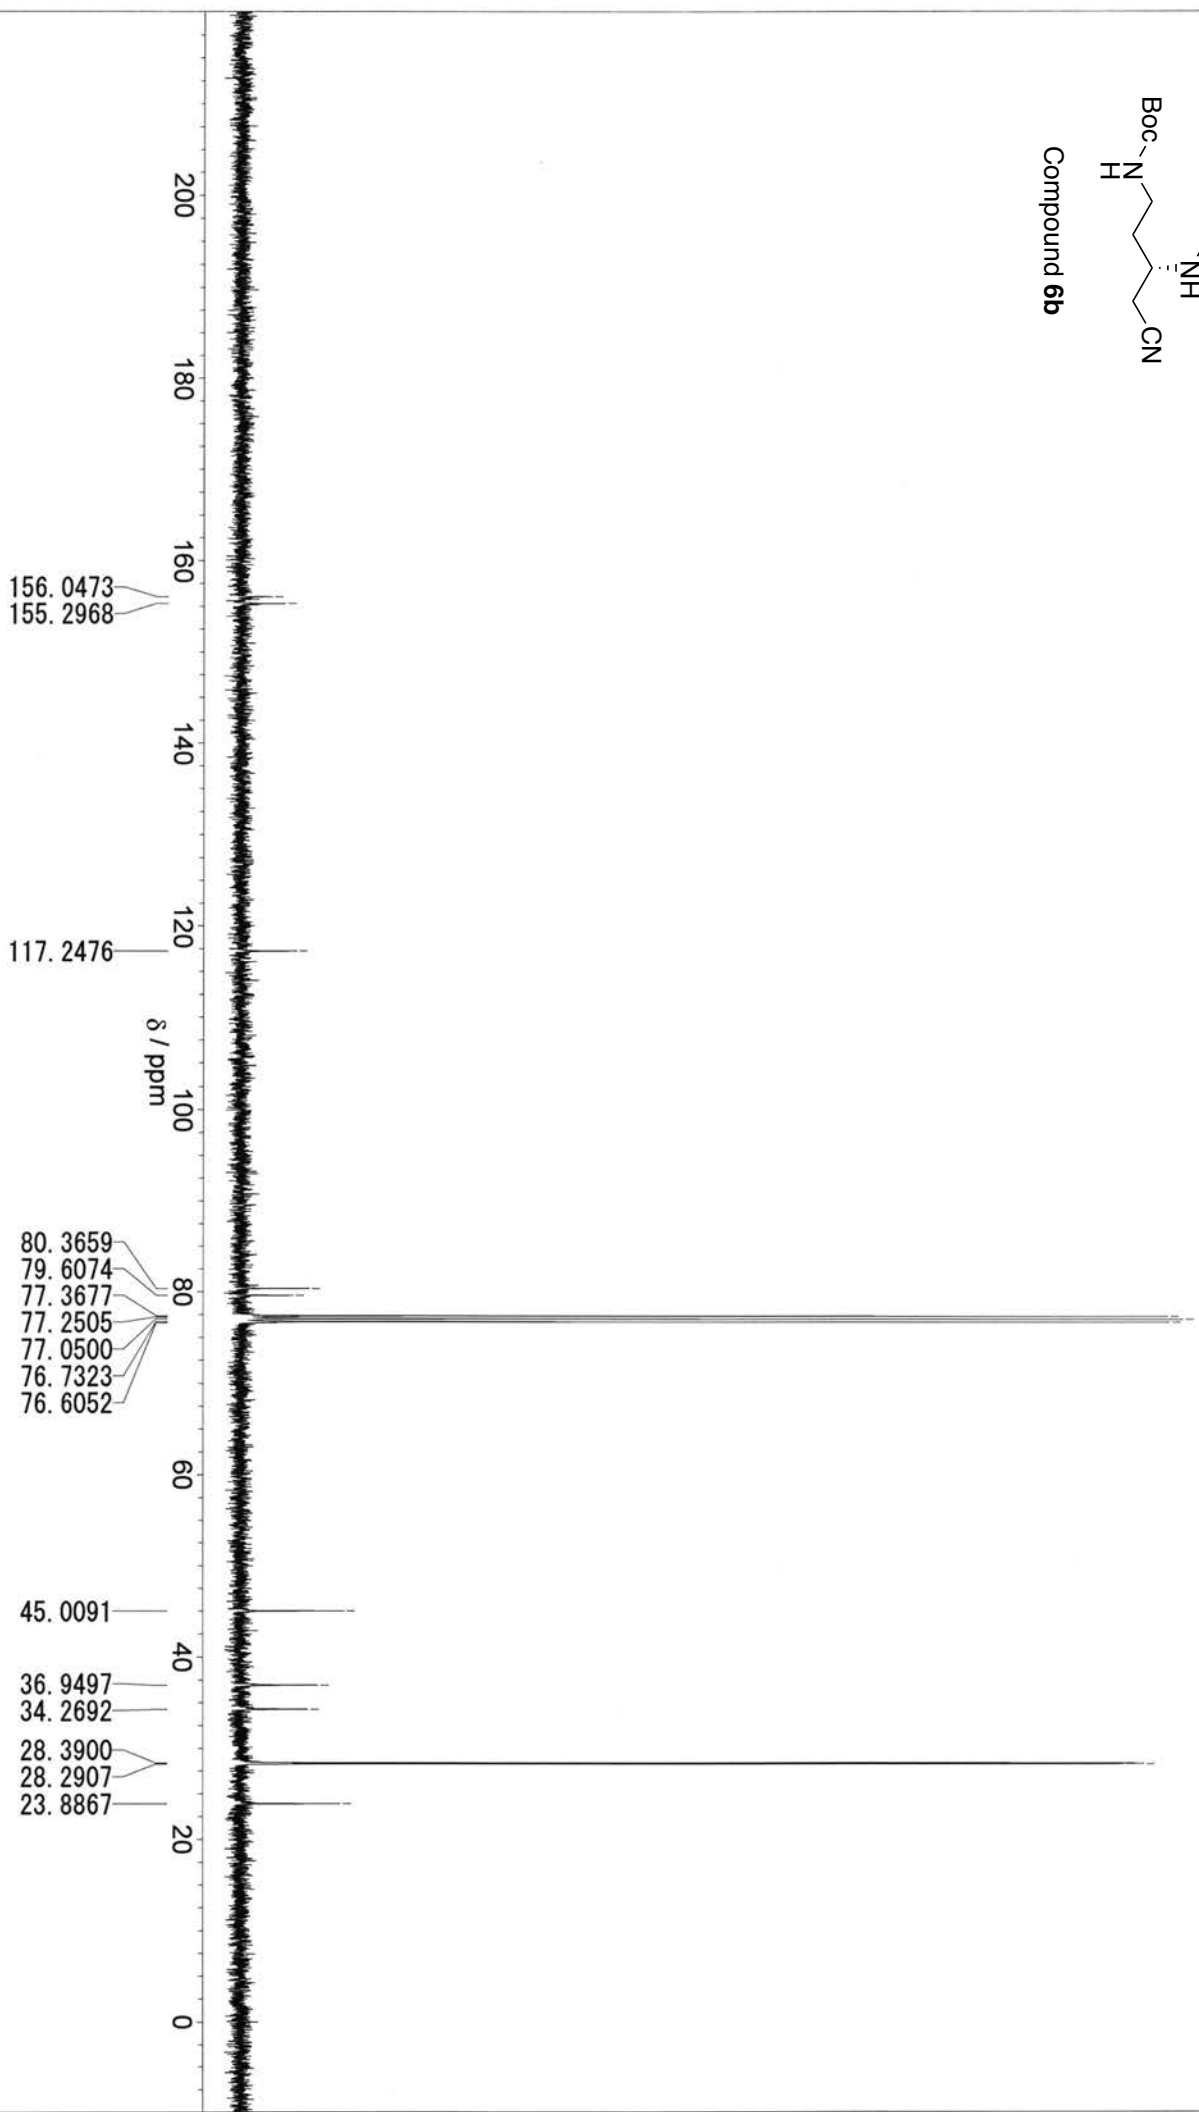

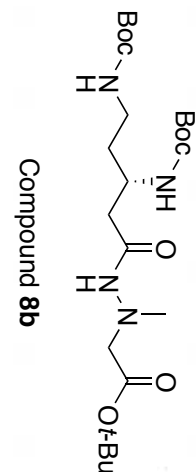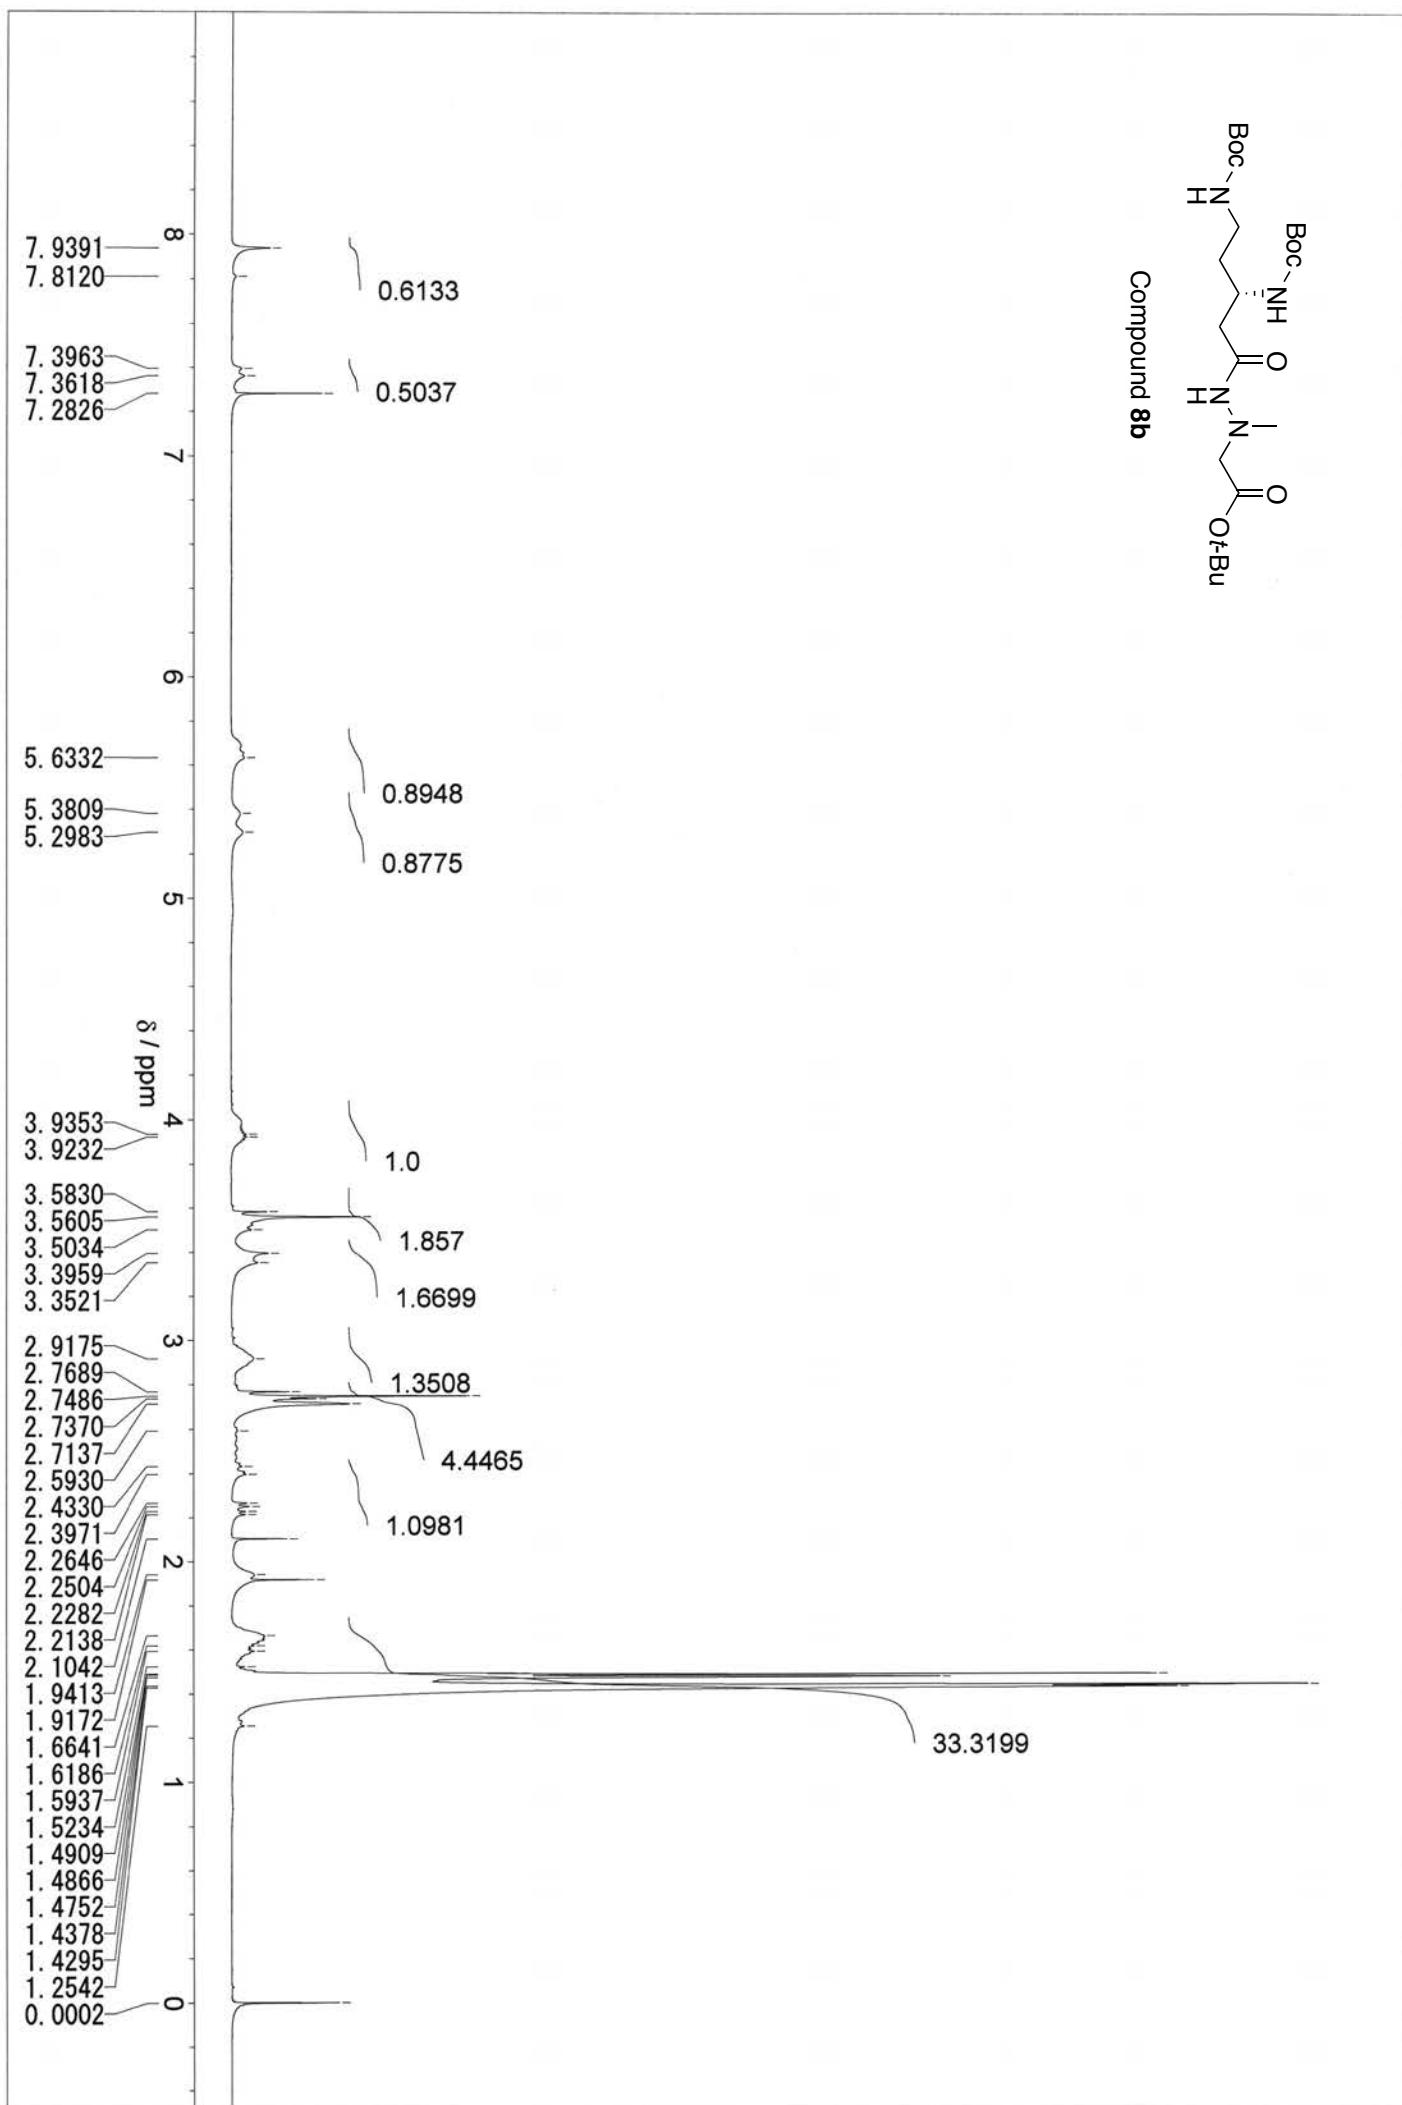

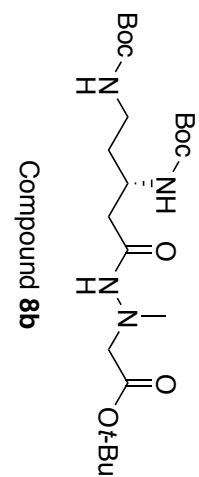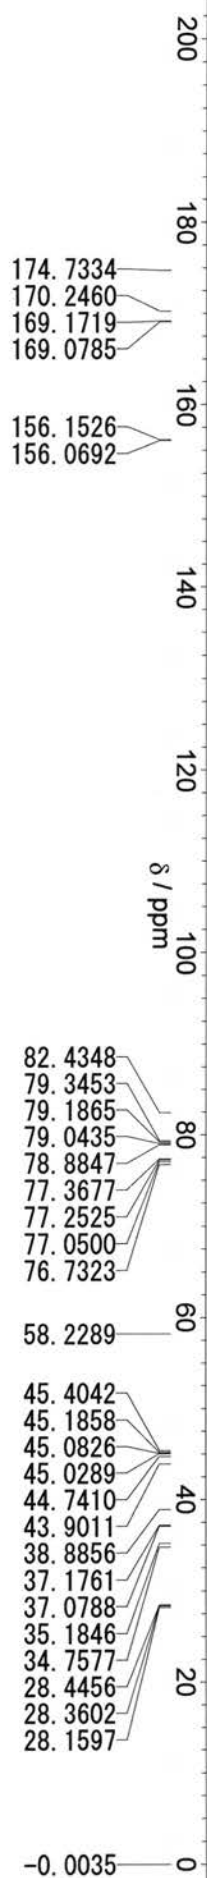

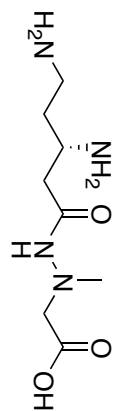

Compound 9b

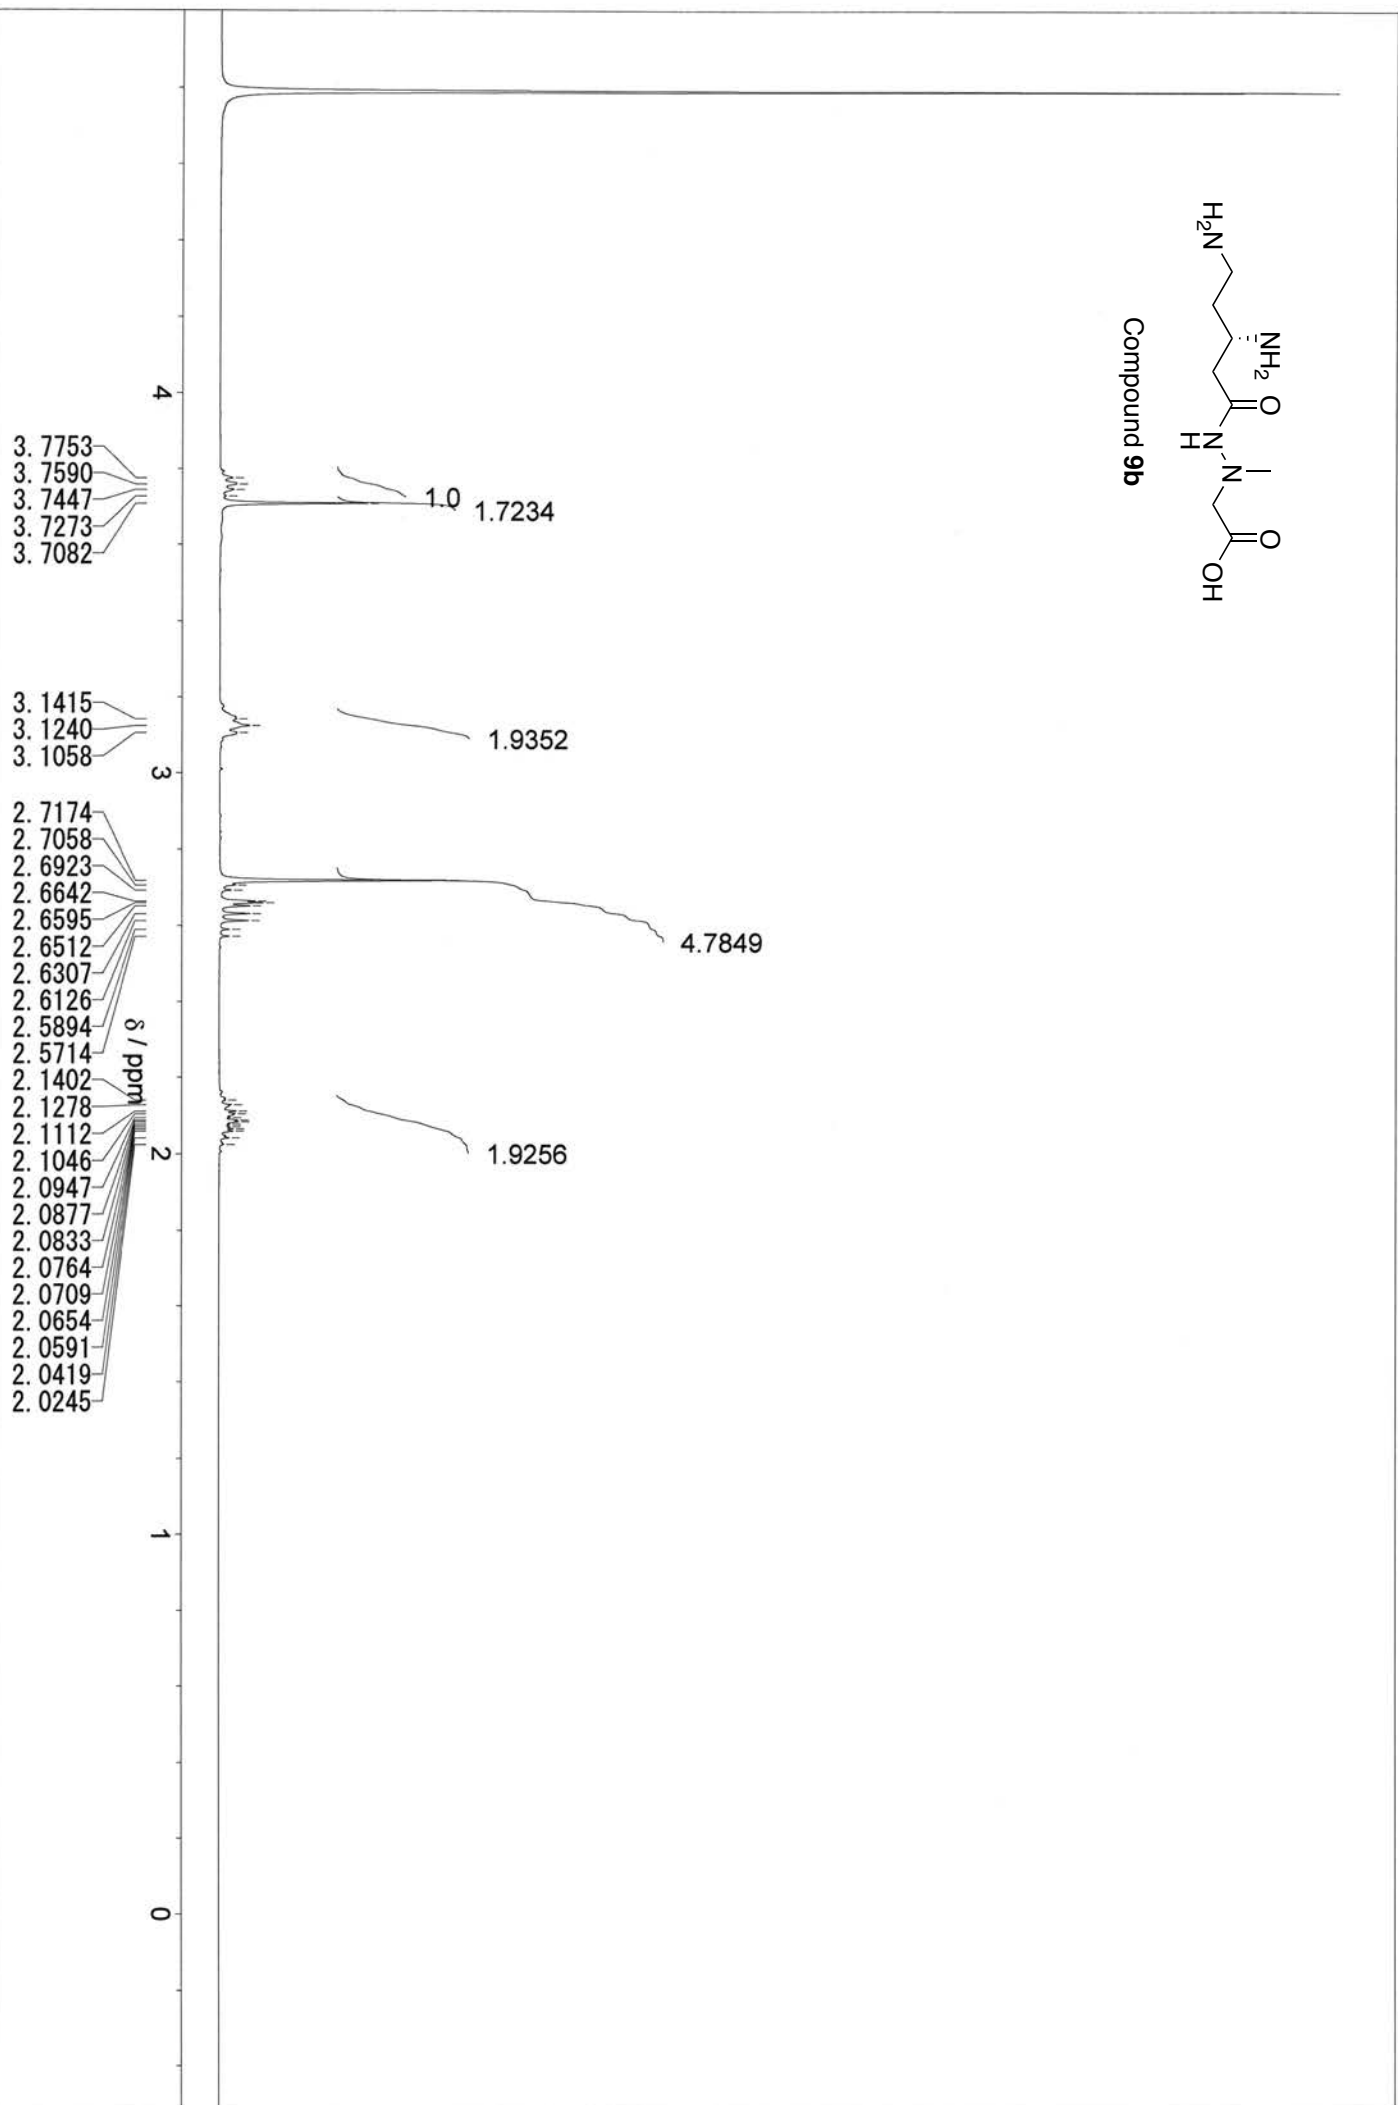

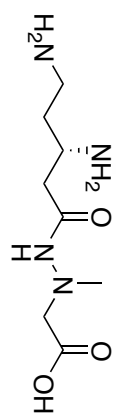

Compound 9b

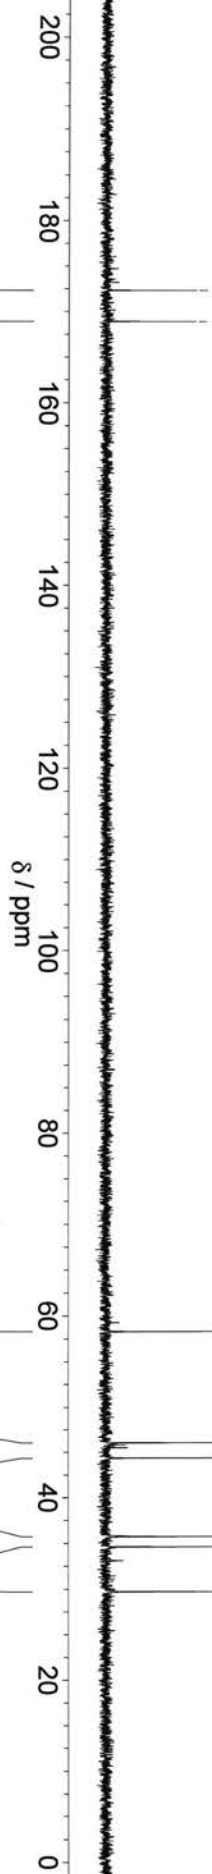

172.3248  
168.8815

58.2856

46.0508  
44.3647

35.7154  
34.6017  
29.7074

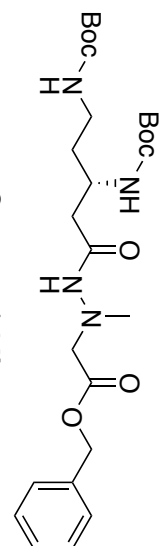

Compound 14b

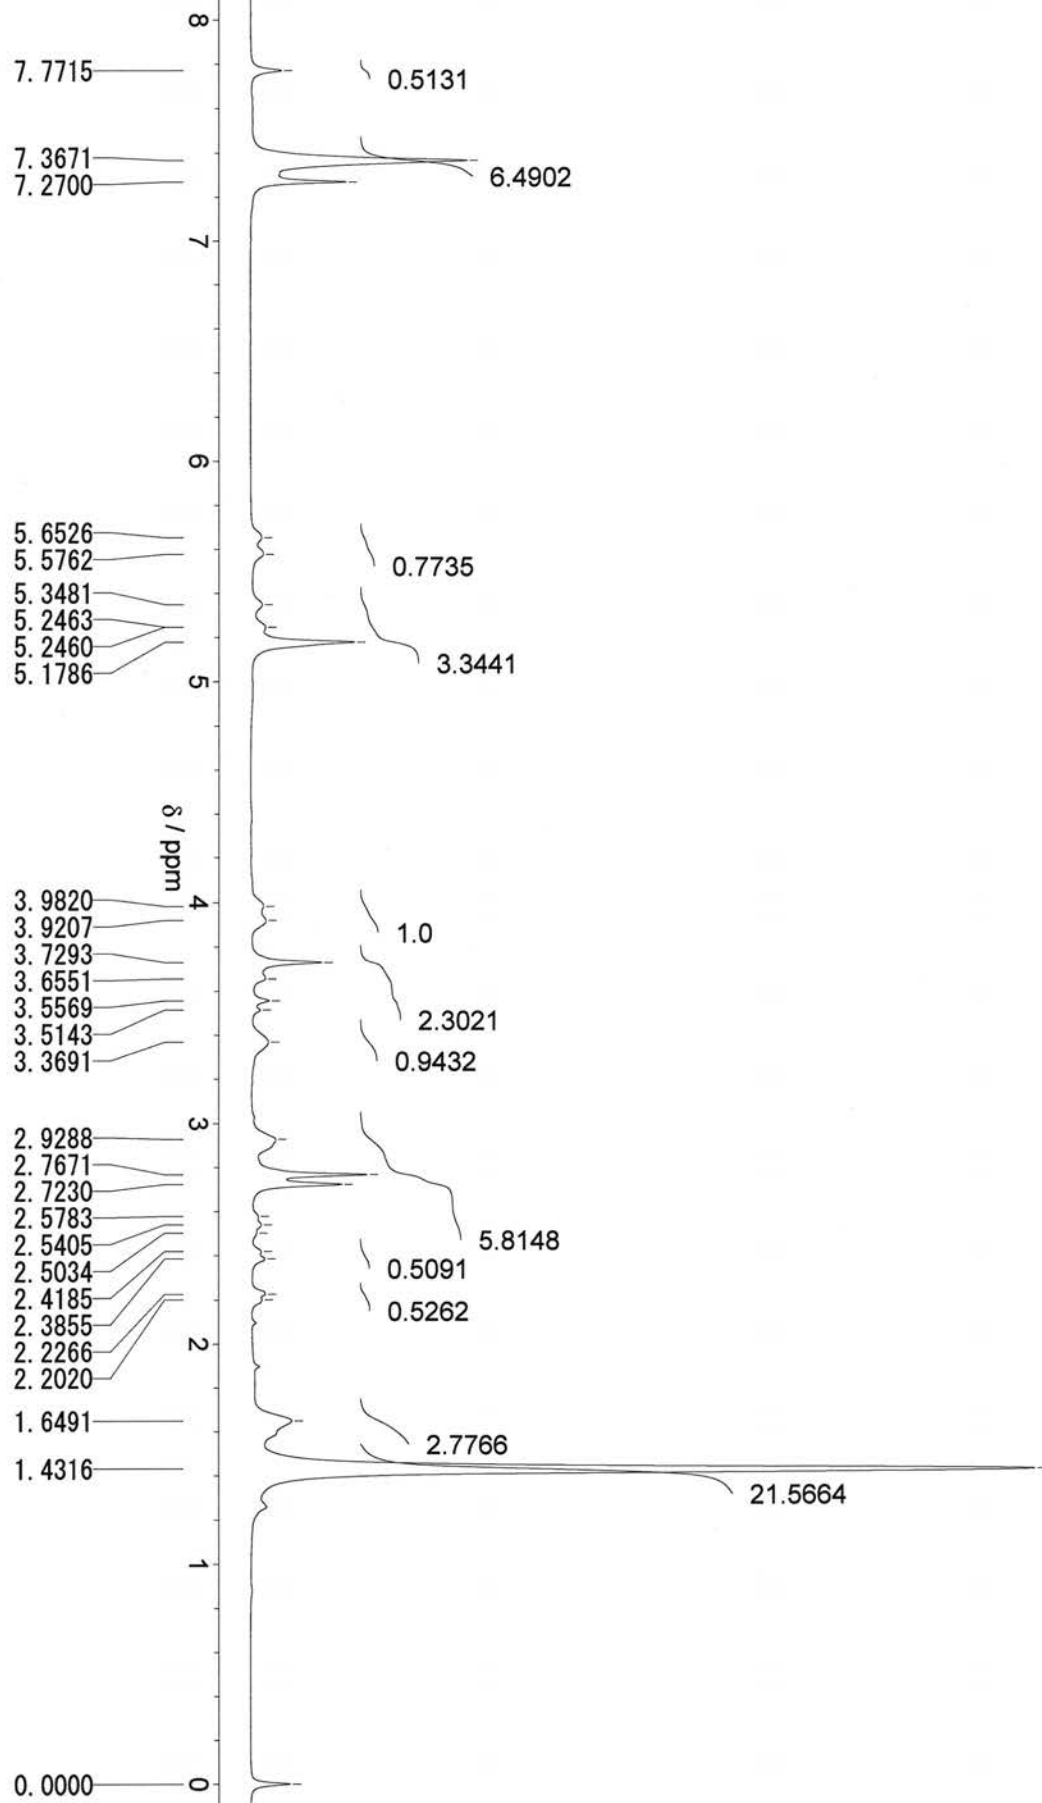

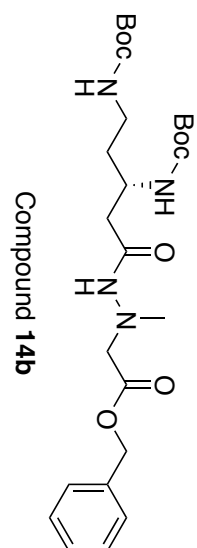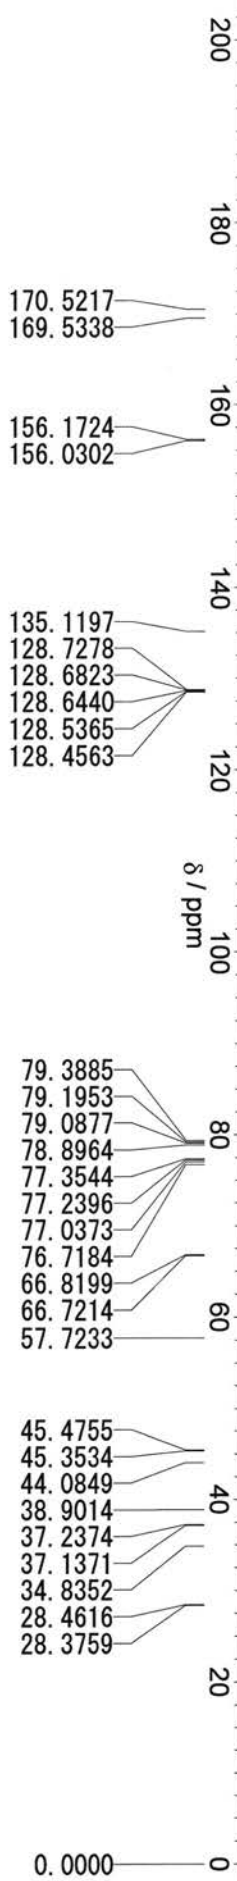



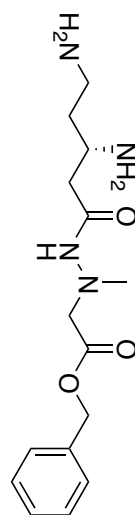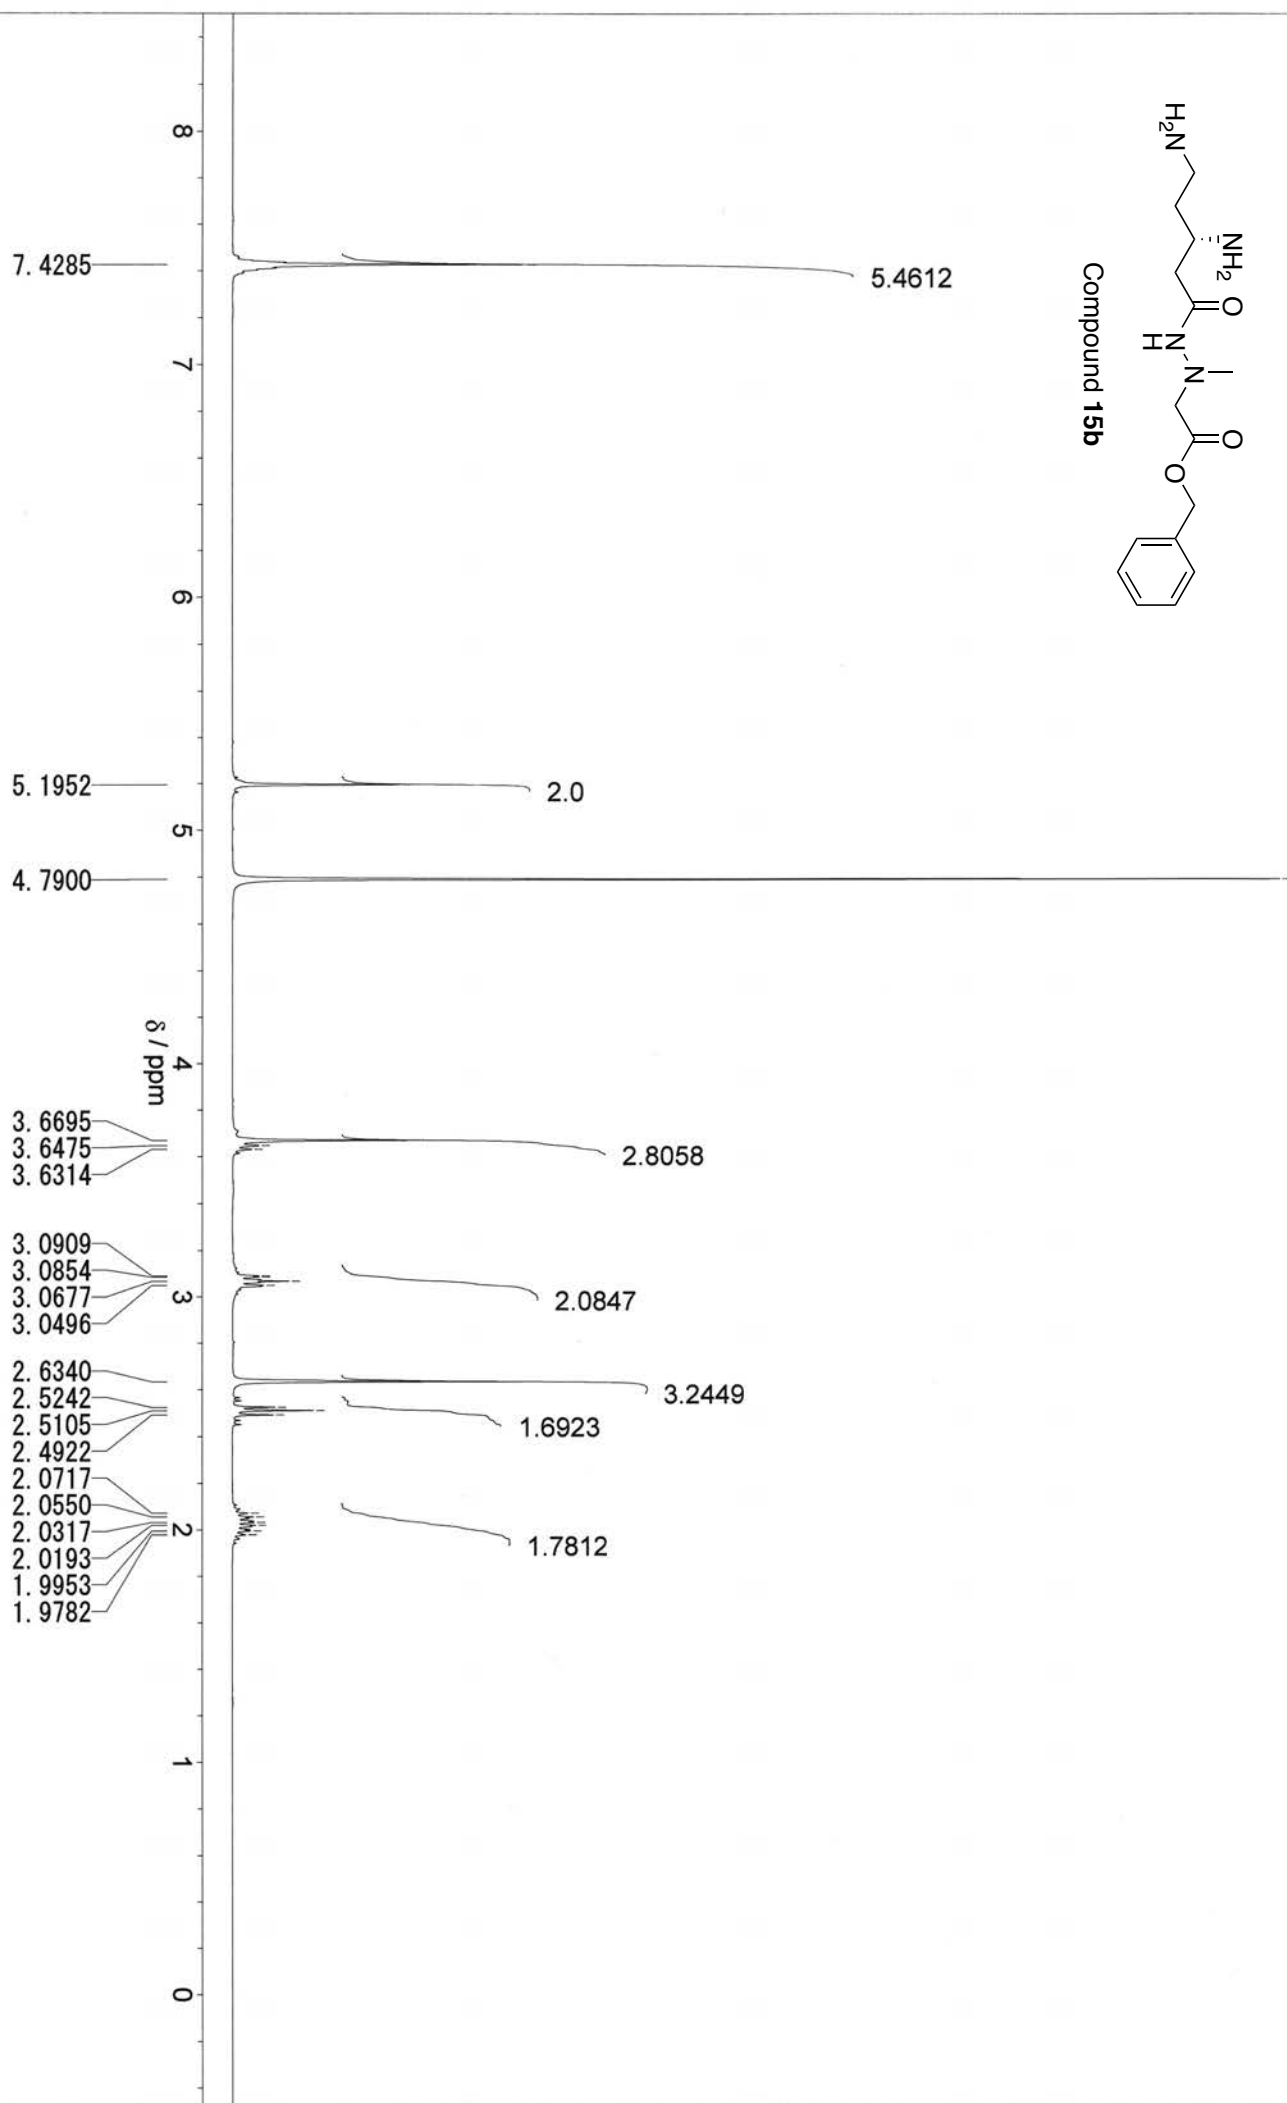

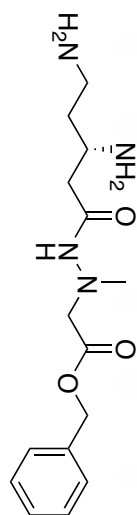

Compound 15b

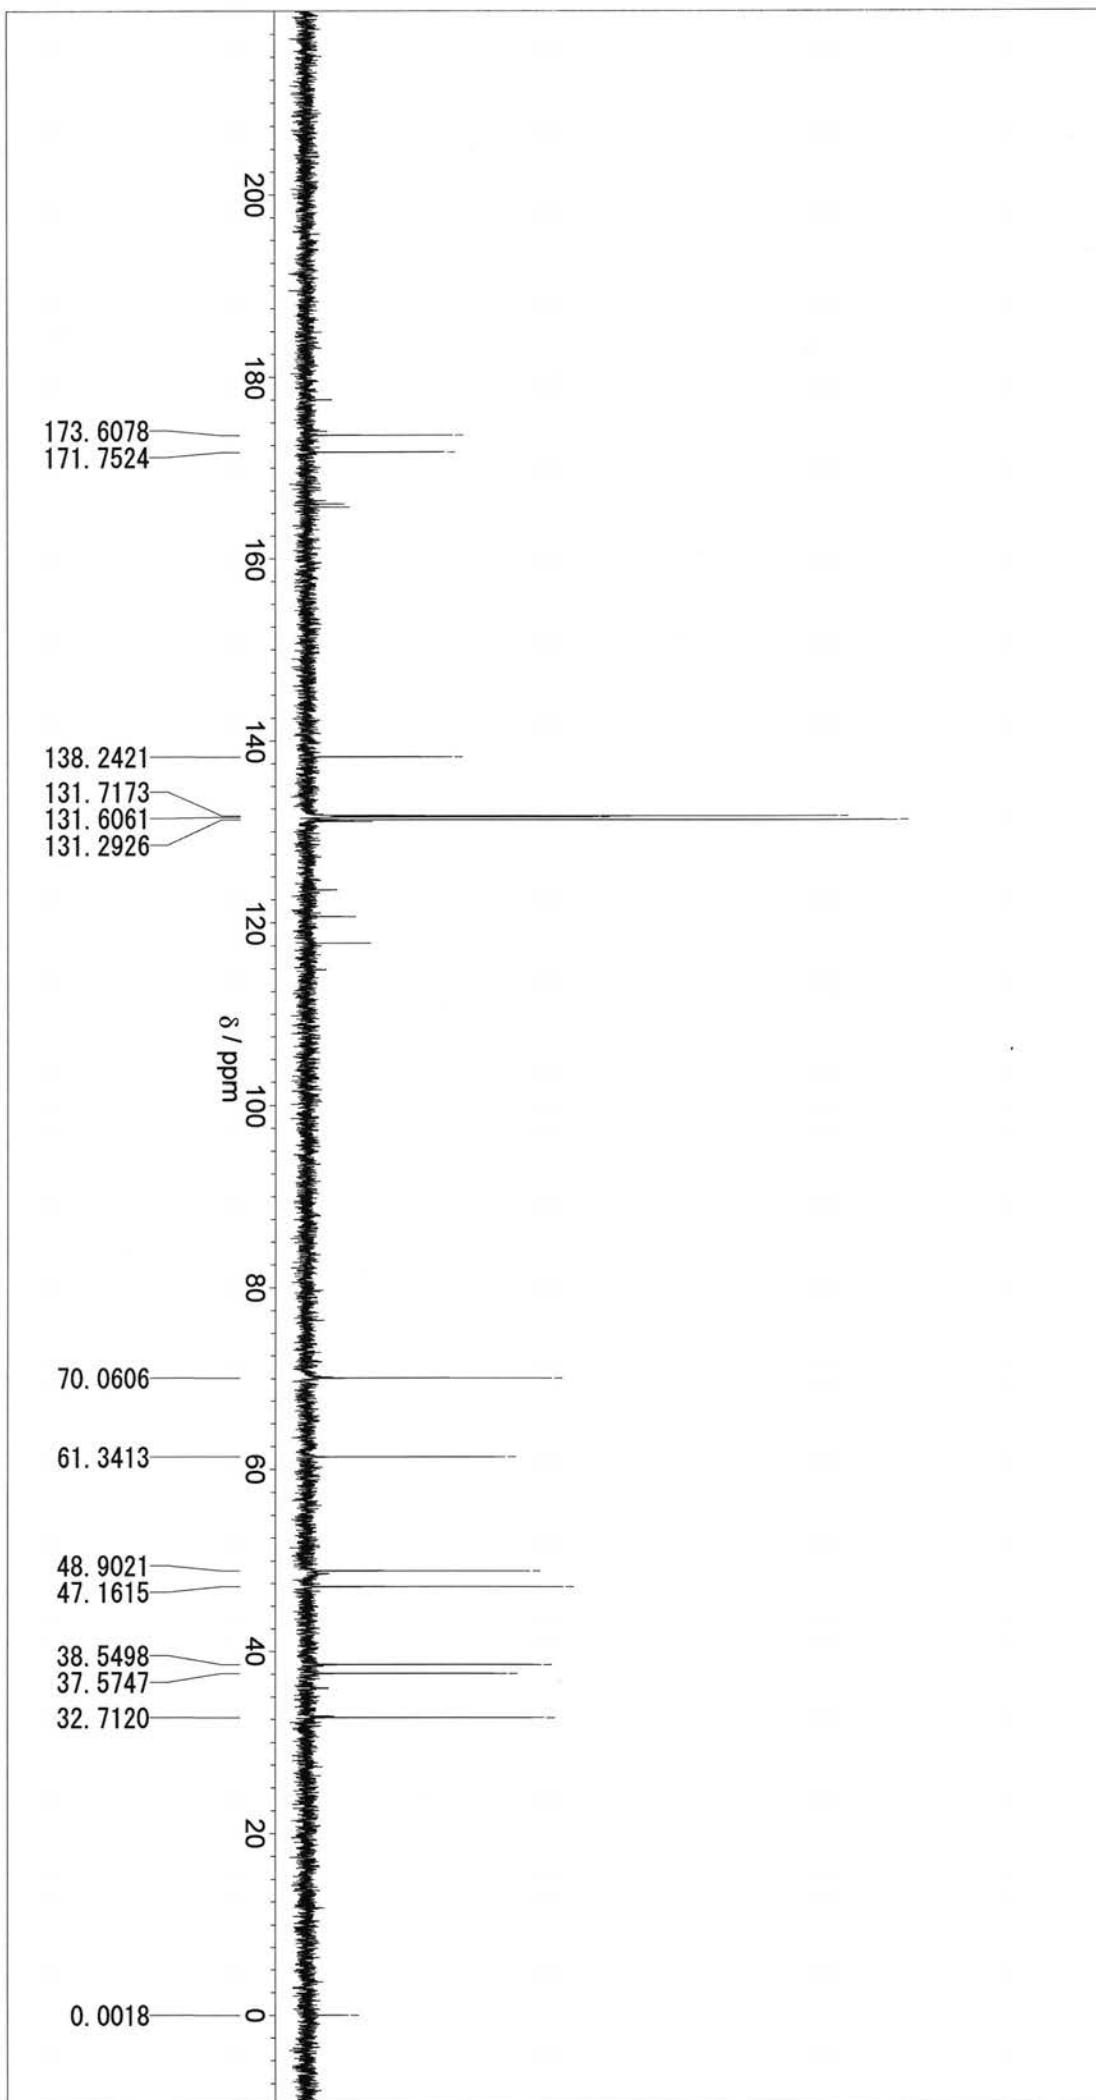

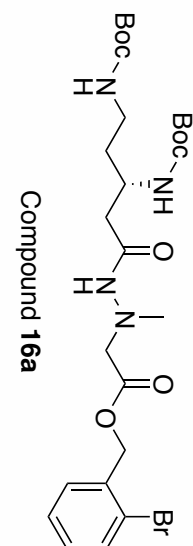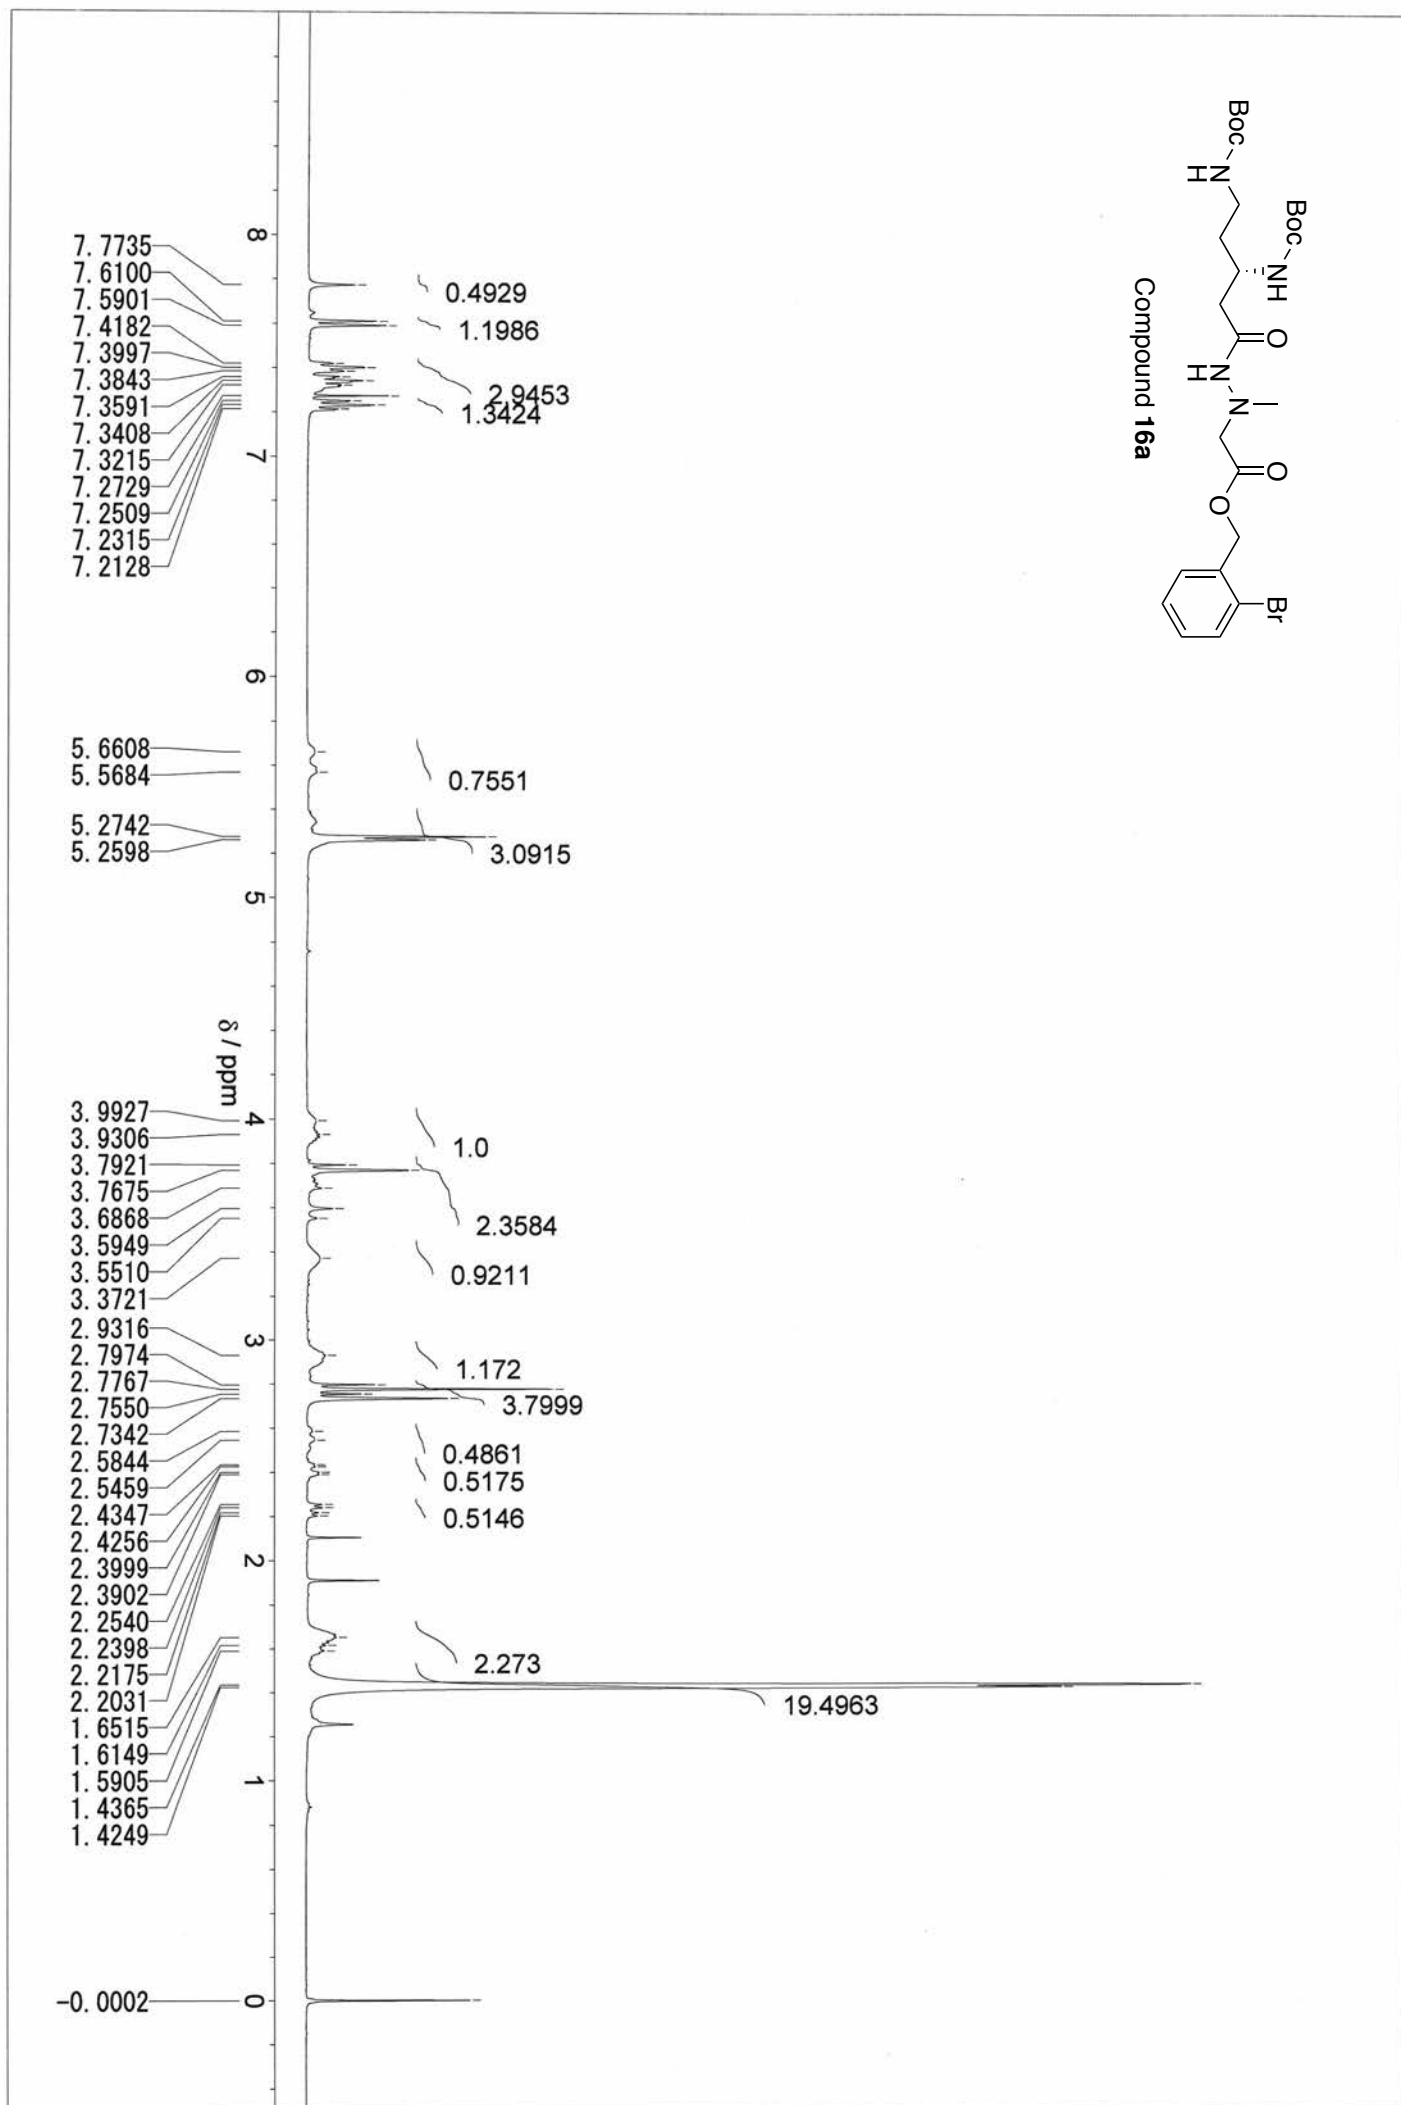

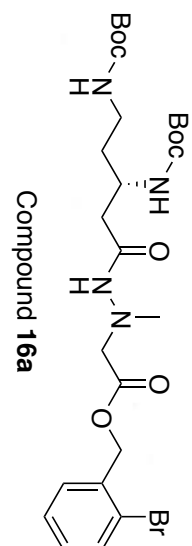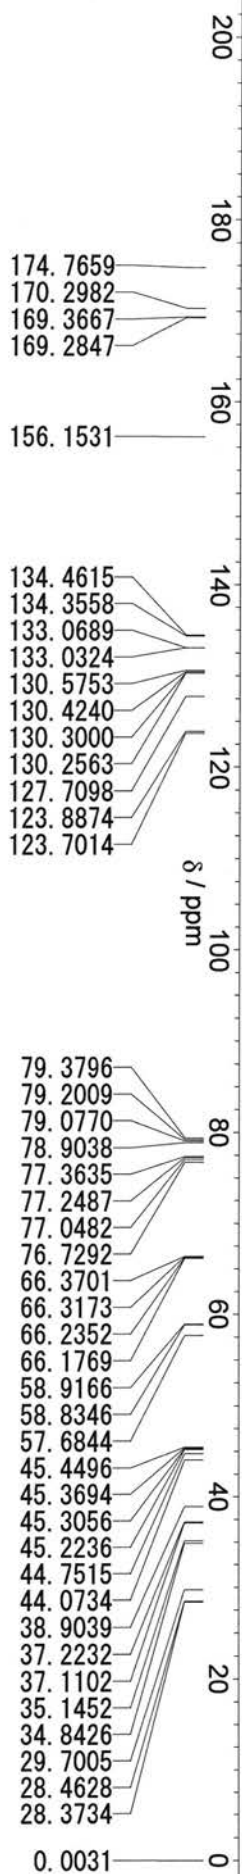

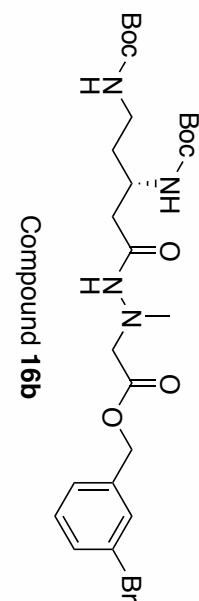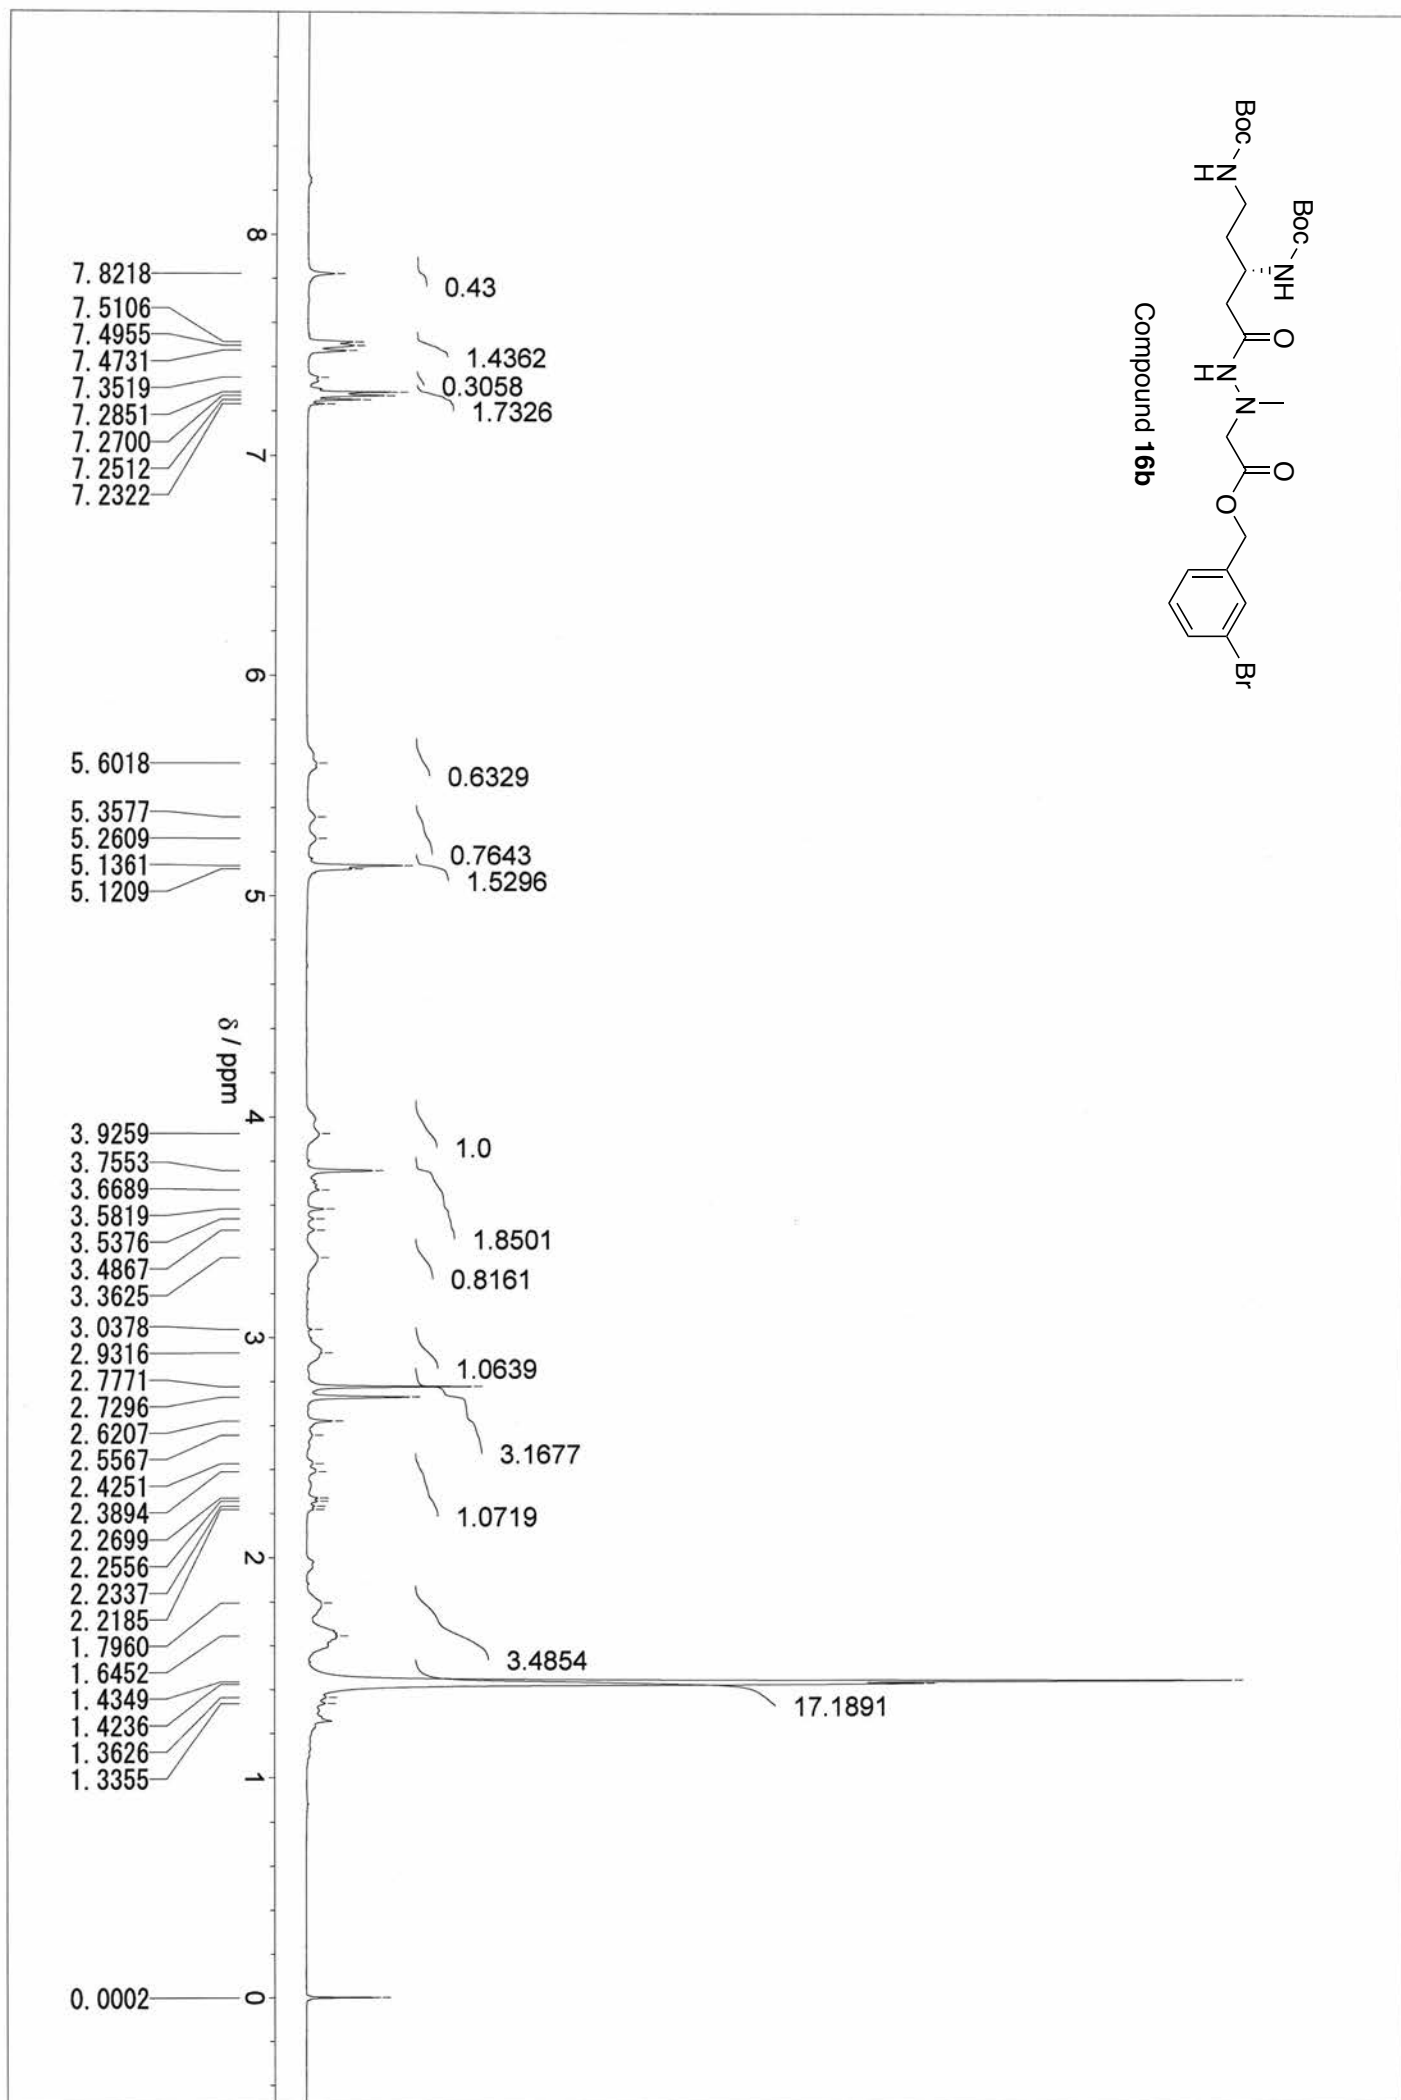

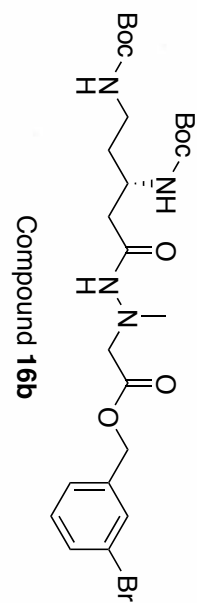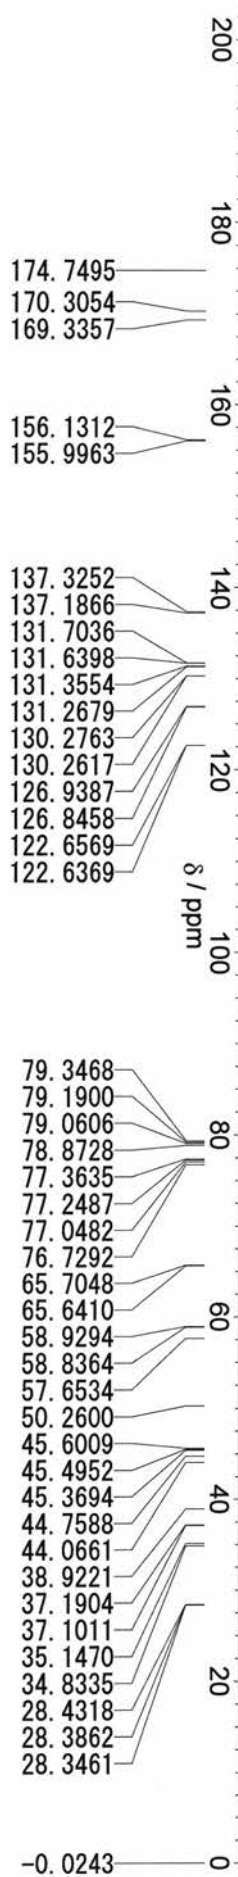

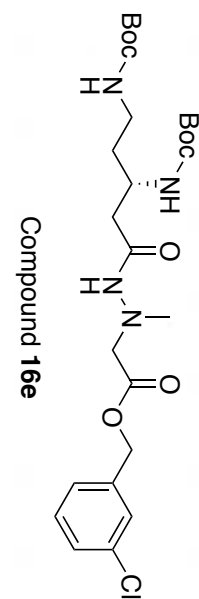

7.7759  
7.3550  
7.3404  
7.3279  
7.3249  
7.3127  
7.2931  
7.2774  
7.2462  
7.2357

5.6454  
5.5651  
5.3431  
5.2421  
5.1773  
5.1433  
5.1295  
5.1116

3.9894  
3.9257  
3.9135  
3.7995  
3.7543  
3.7064  
3.6927  
3.6720  
3.5776  
3.5334  
3.3650  
2.9959  
2.9316  
2.7767  
2.7306  
2.6040  
2.5517  
2.4253  
2.3999  
2.2609  
2.2462  
2.2244  
2.2097  
1.6684  
1.6562  
1.6457  
1.6333  
1.6196  
1.5938  
1.4355  
1.4244

0.0000

$\delta$  / ppm

8

7

6

5

4

3

2

1

0

0.5196

4.6739

0.8046

2.9526

1.0

2.0688

0.9276

1.1257

3.5489

0.4255

0.5272

2.2451

19.1793

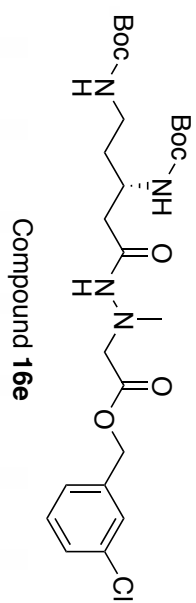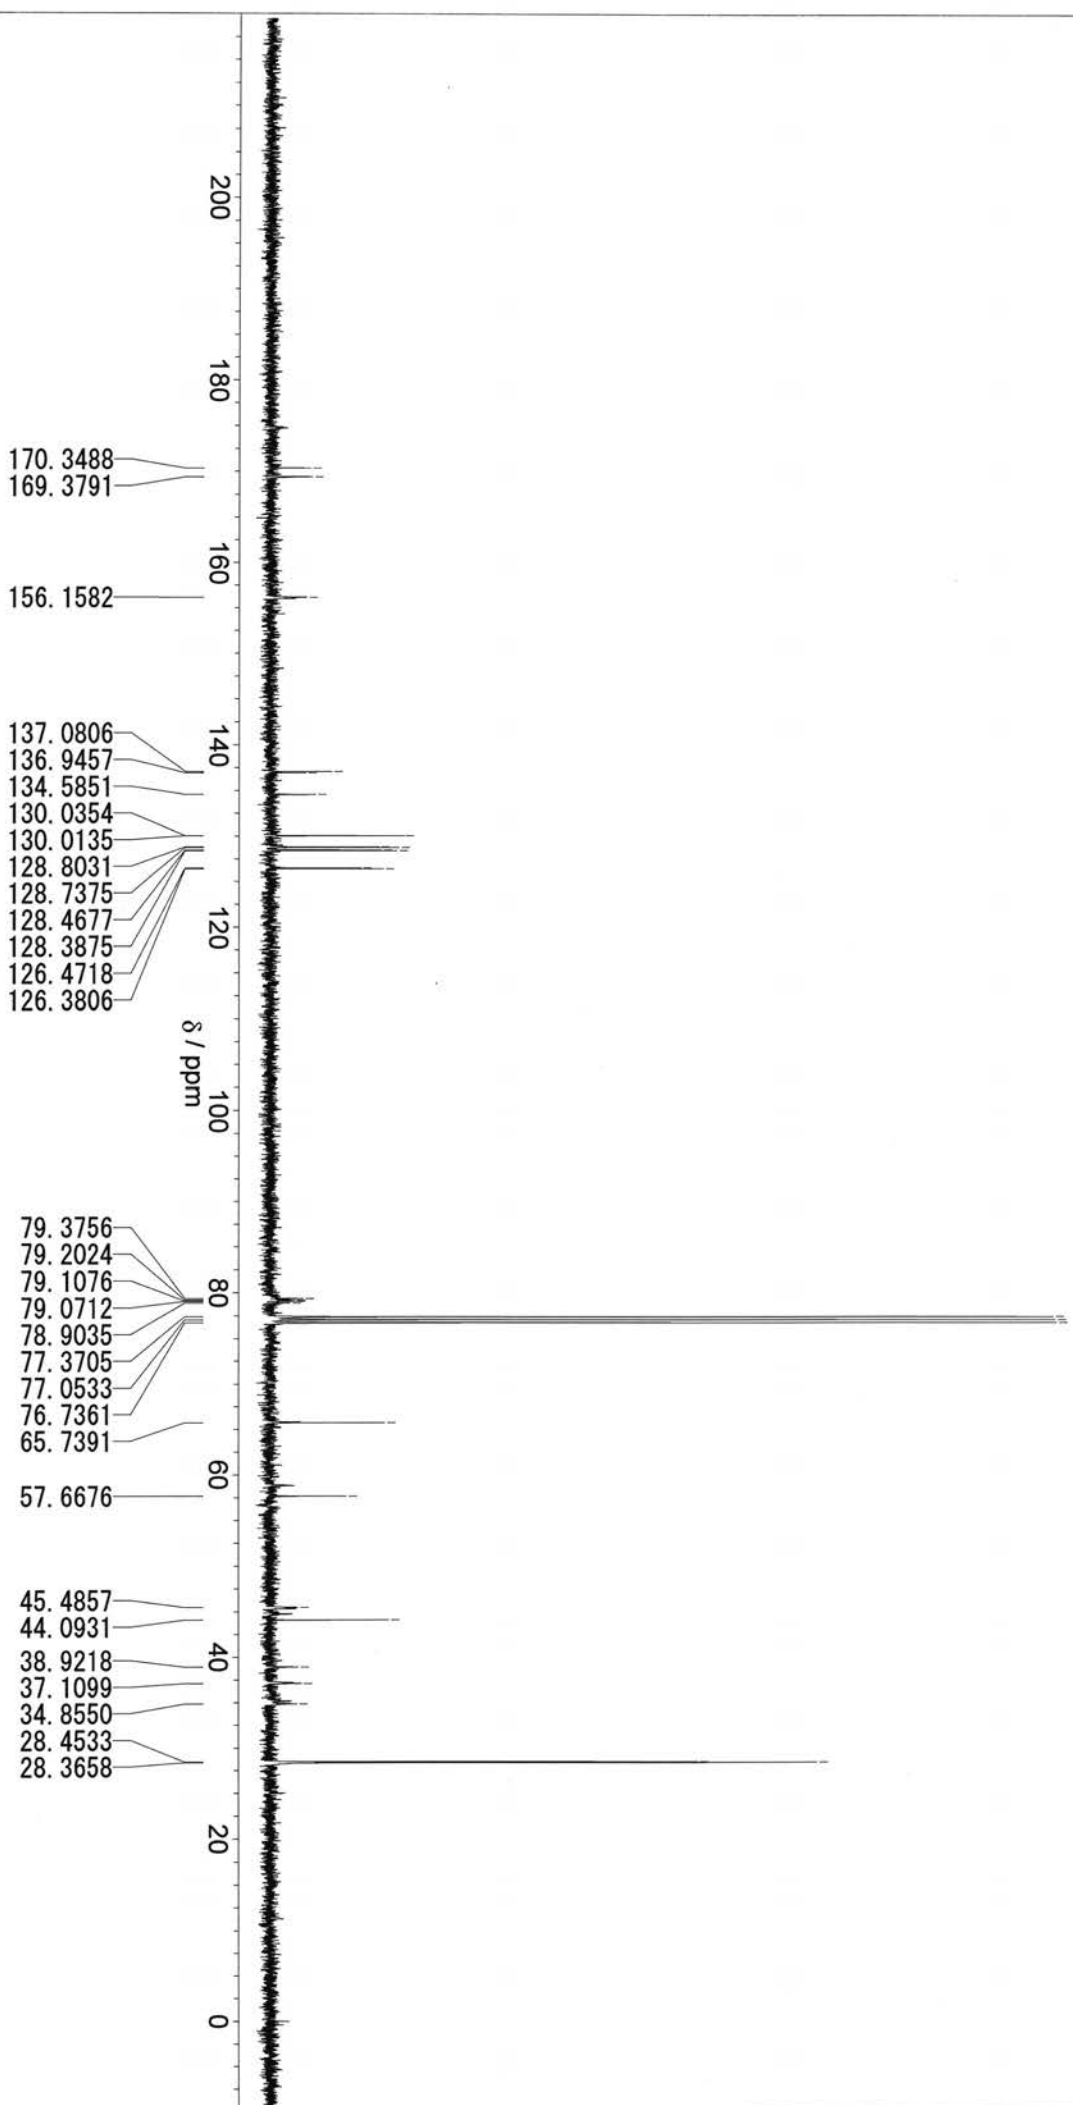



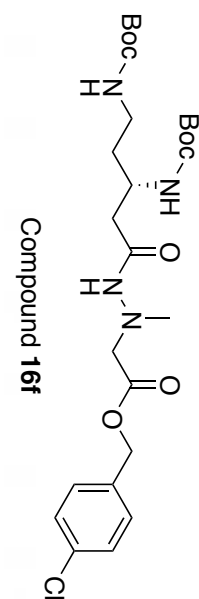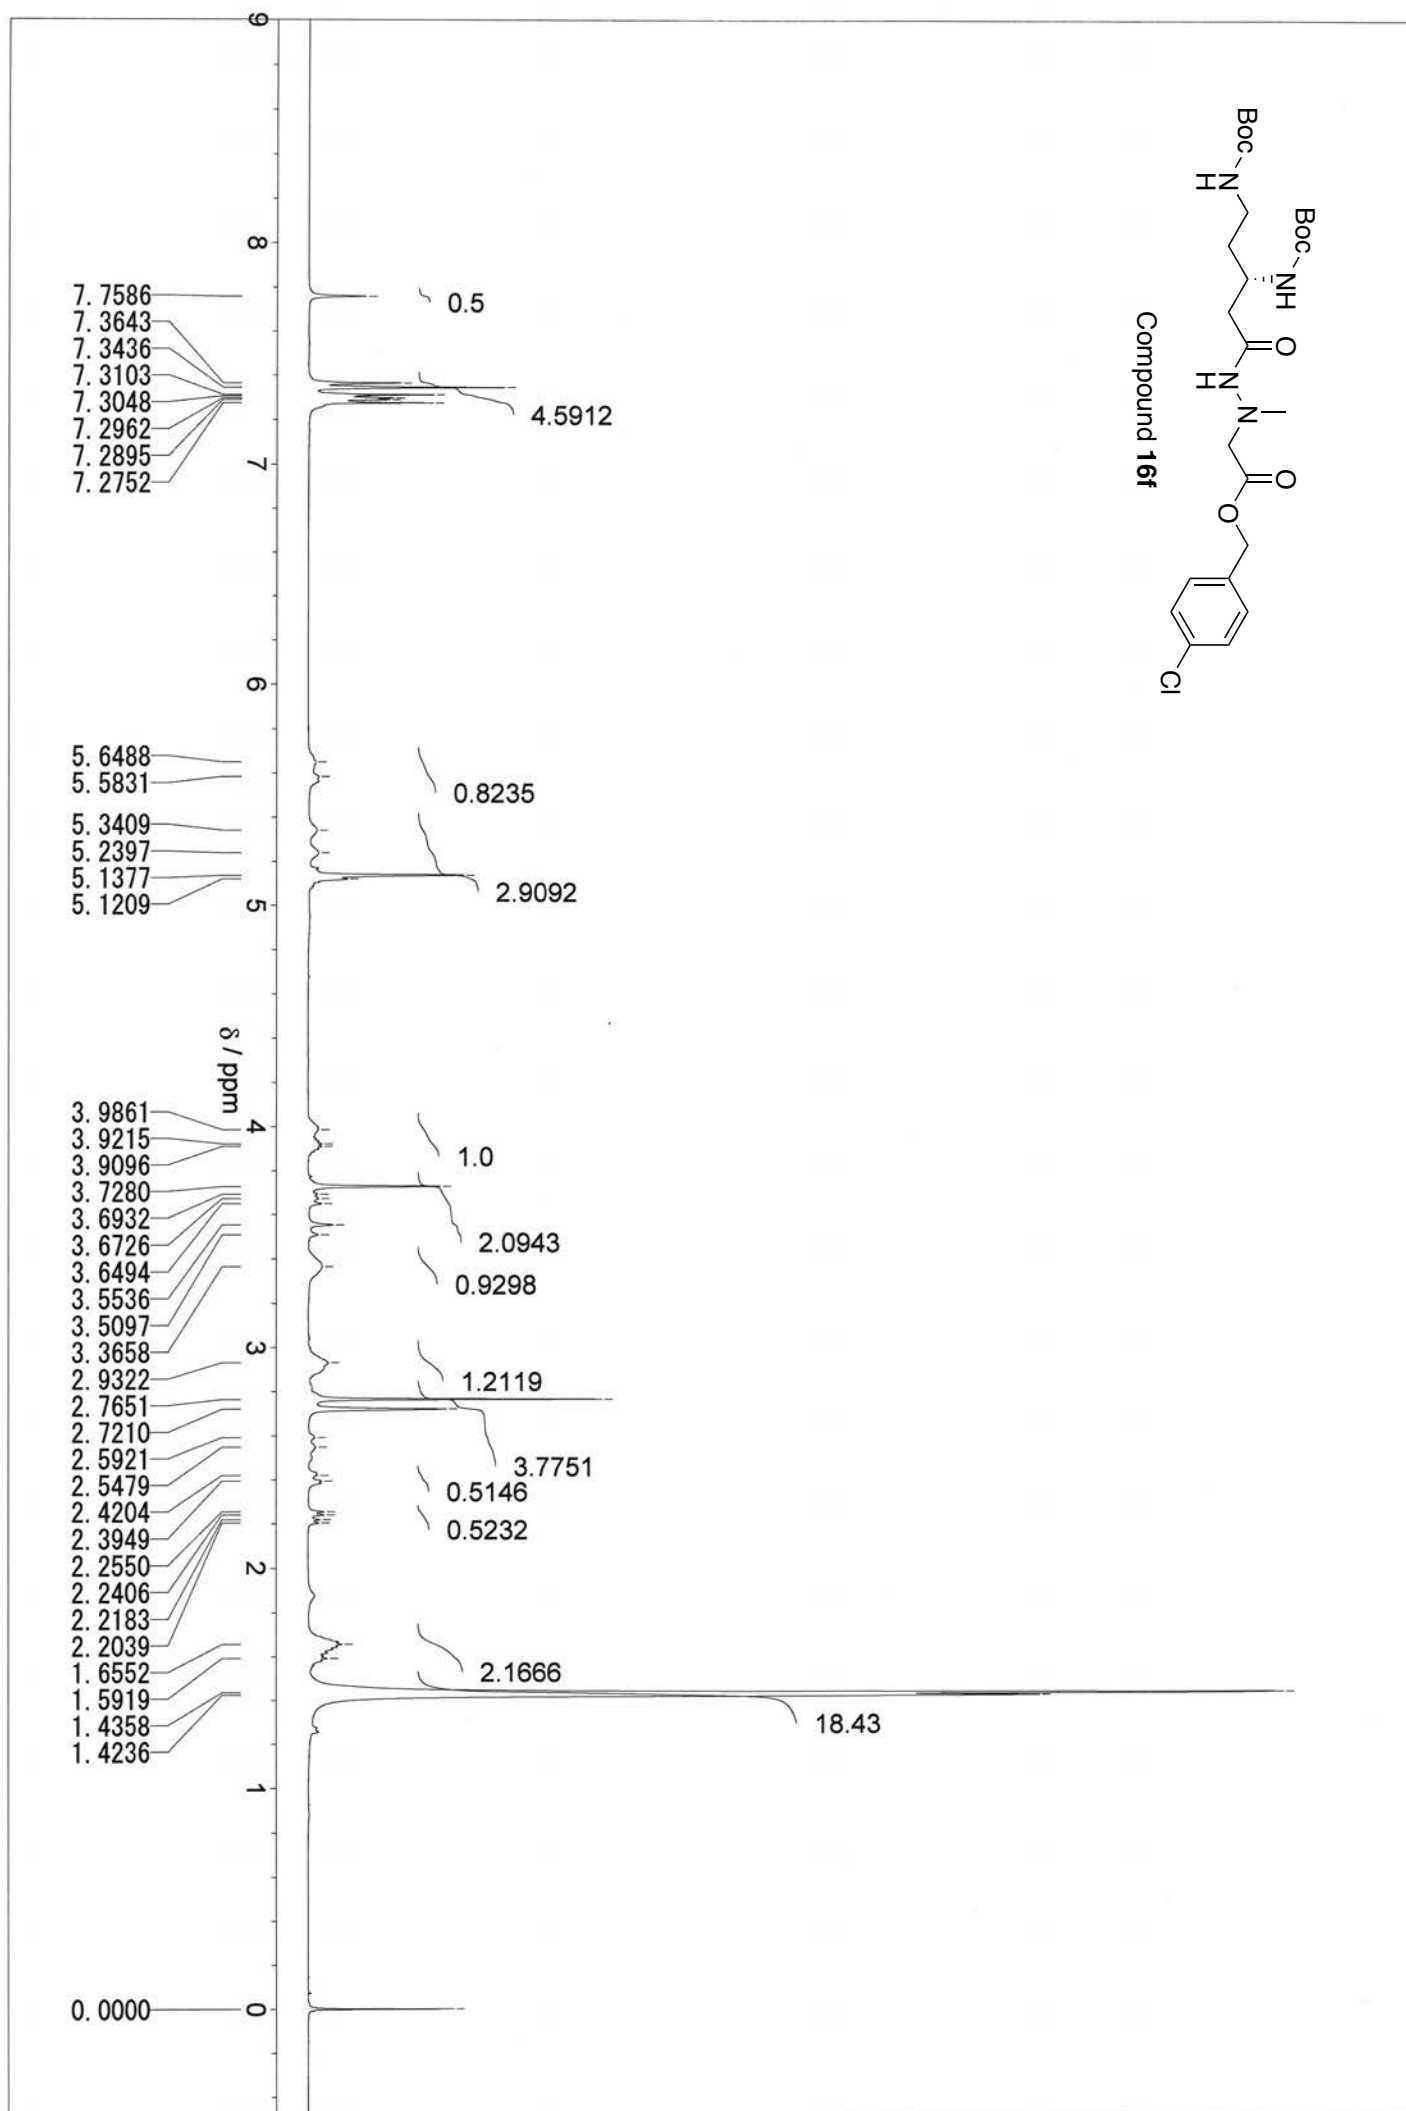

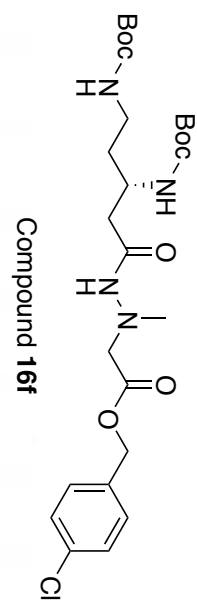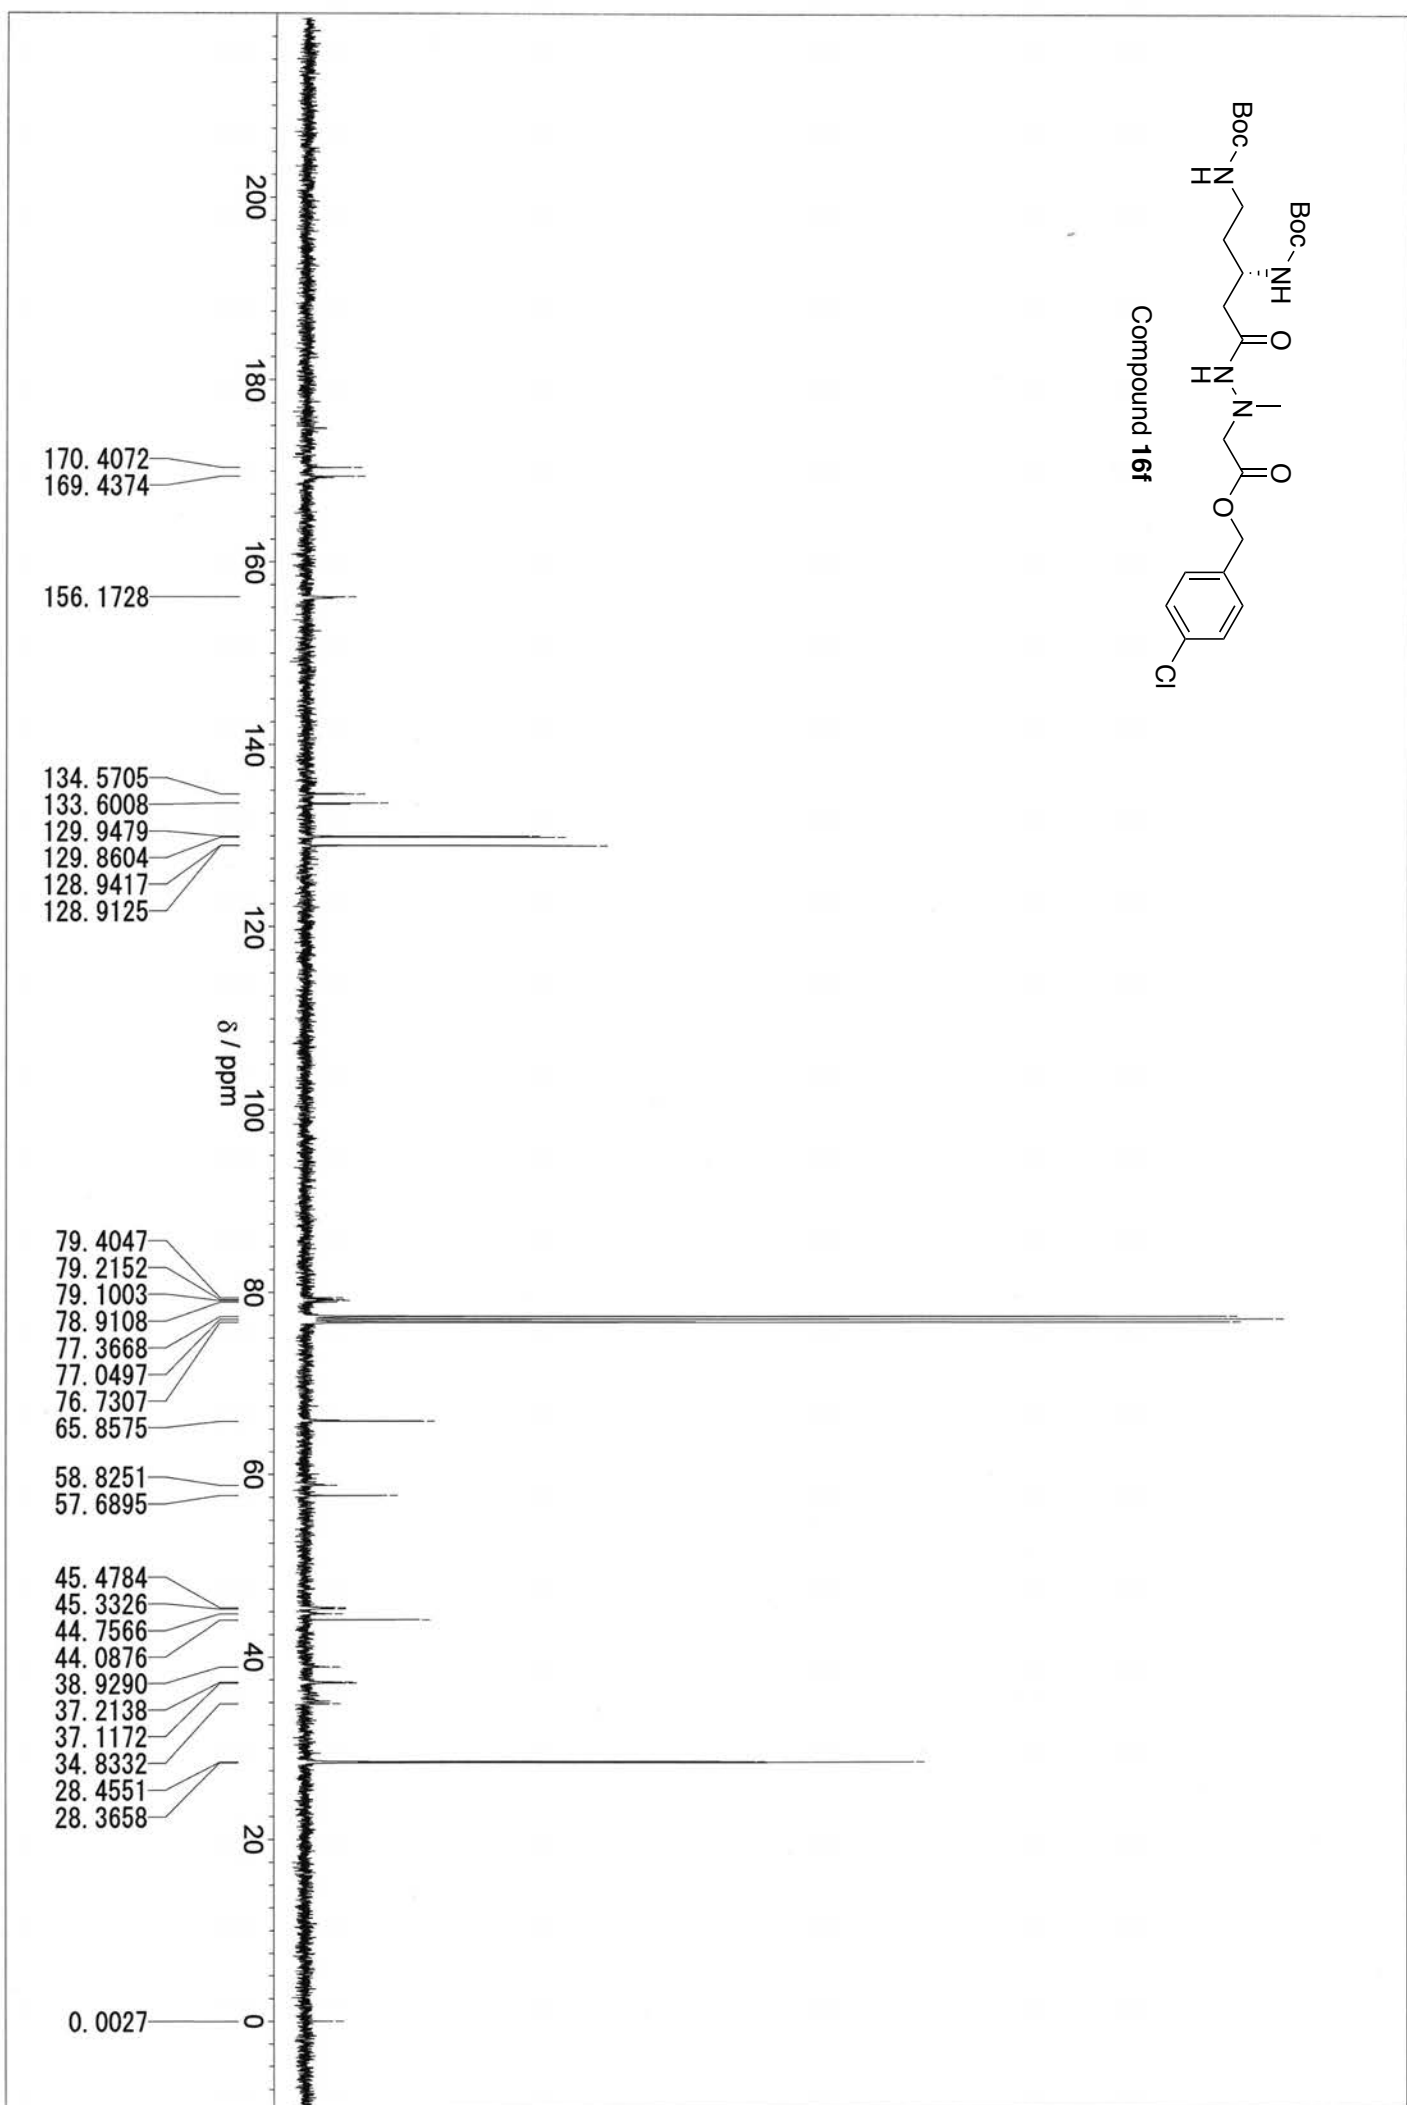

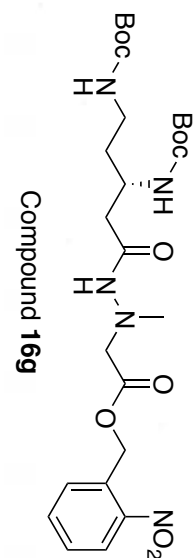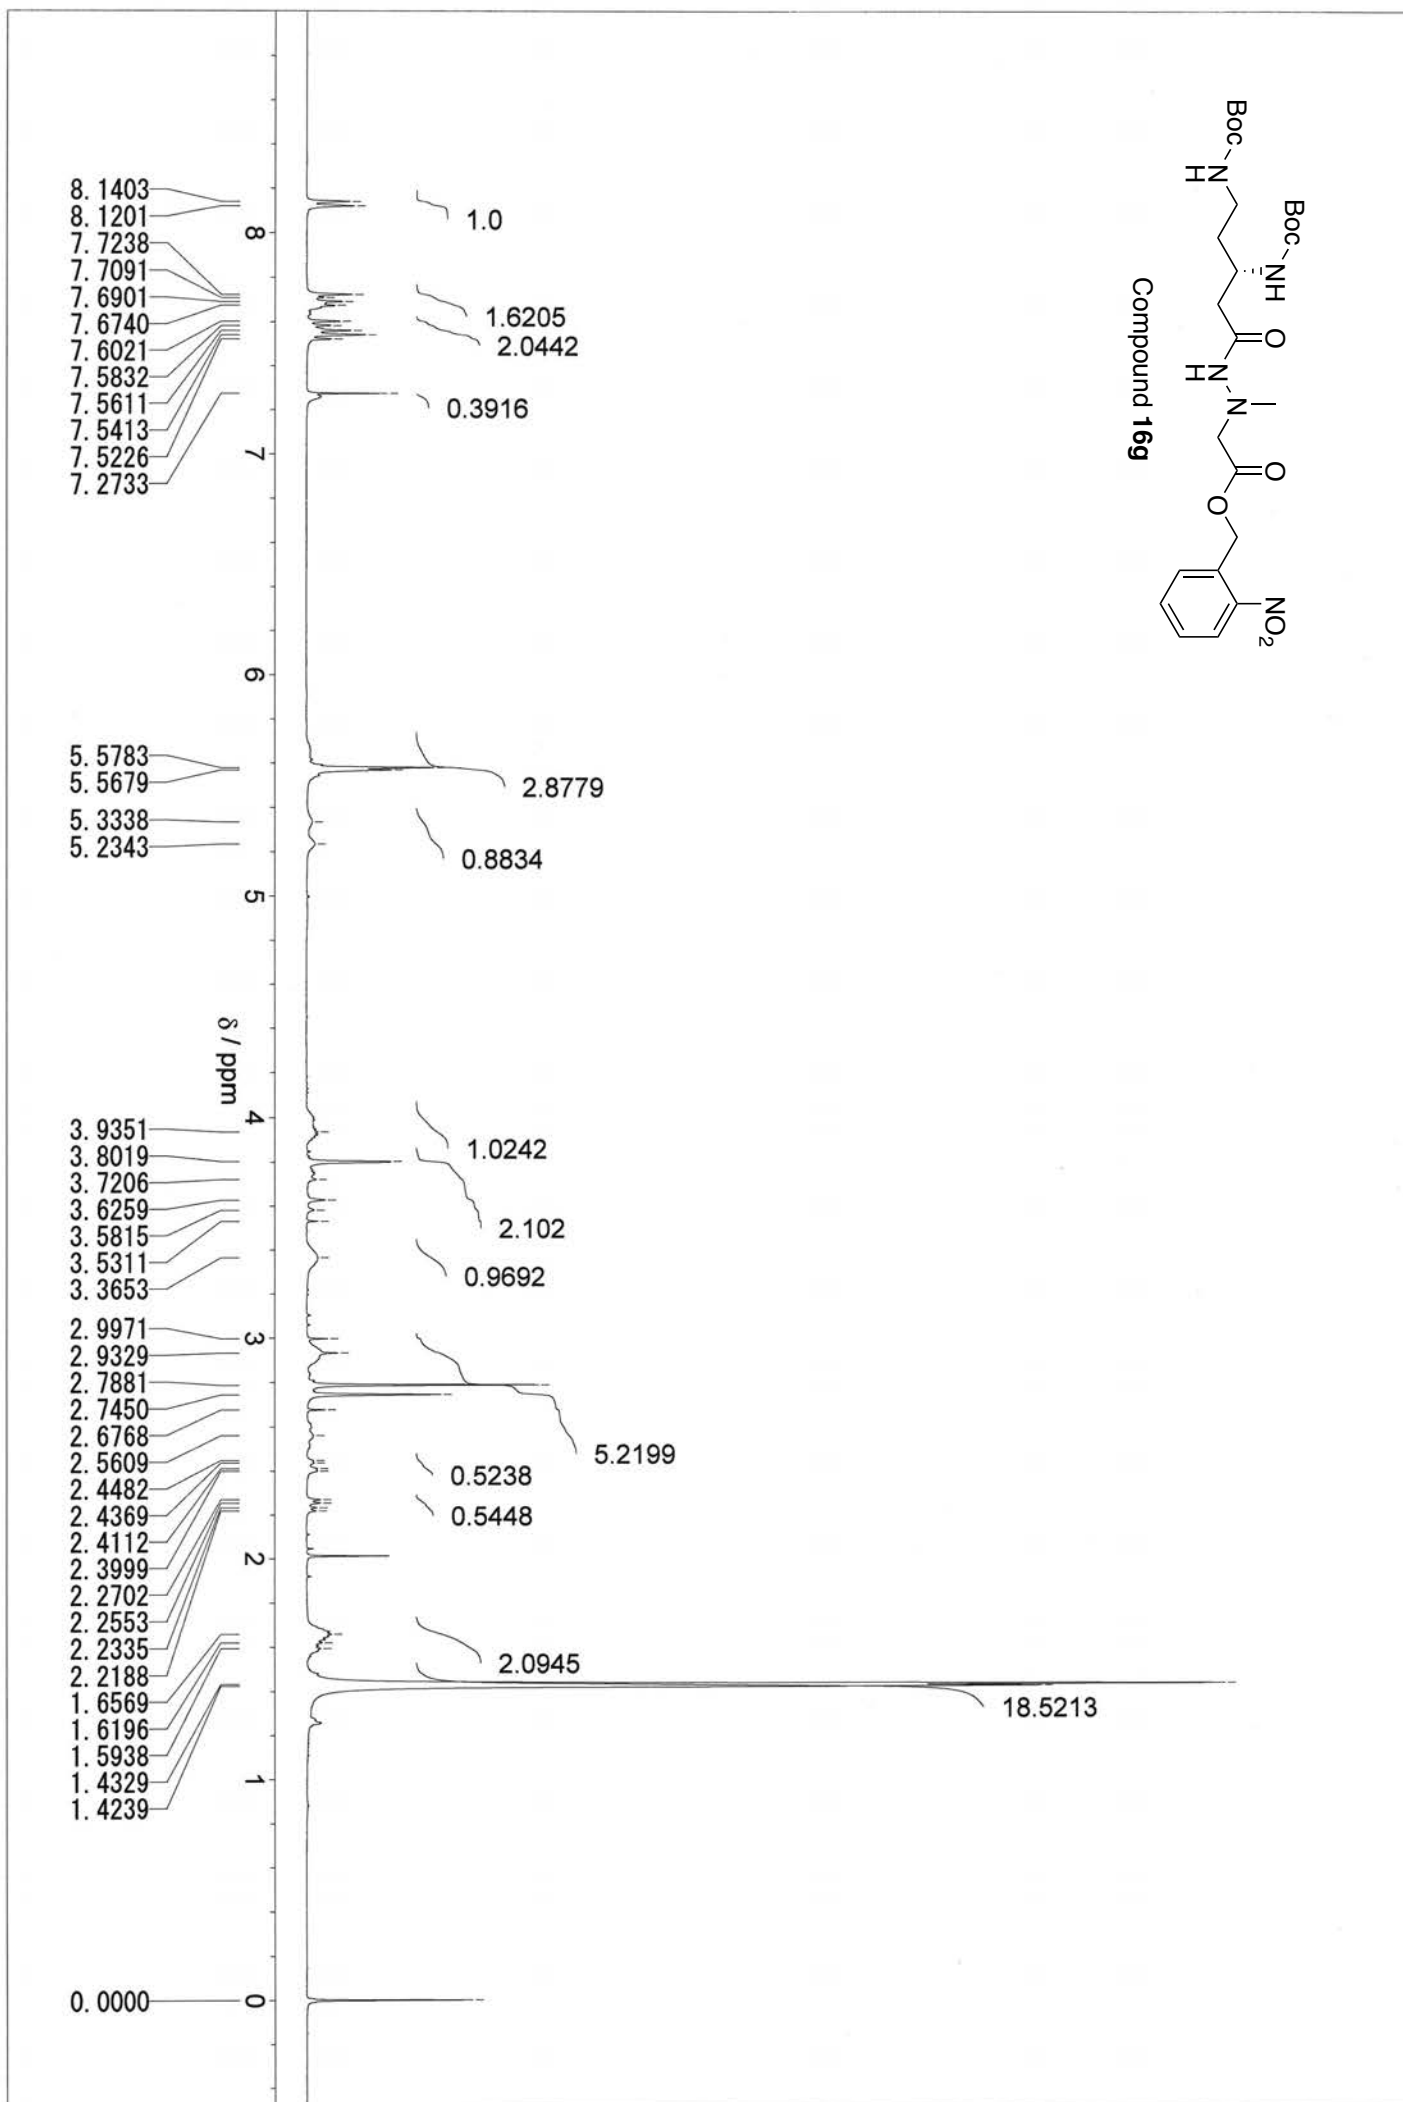

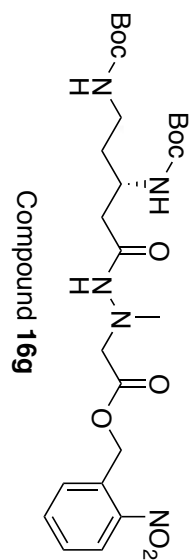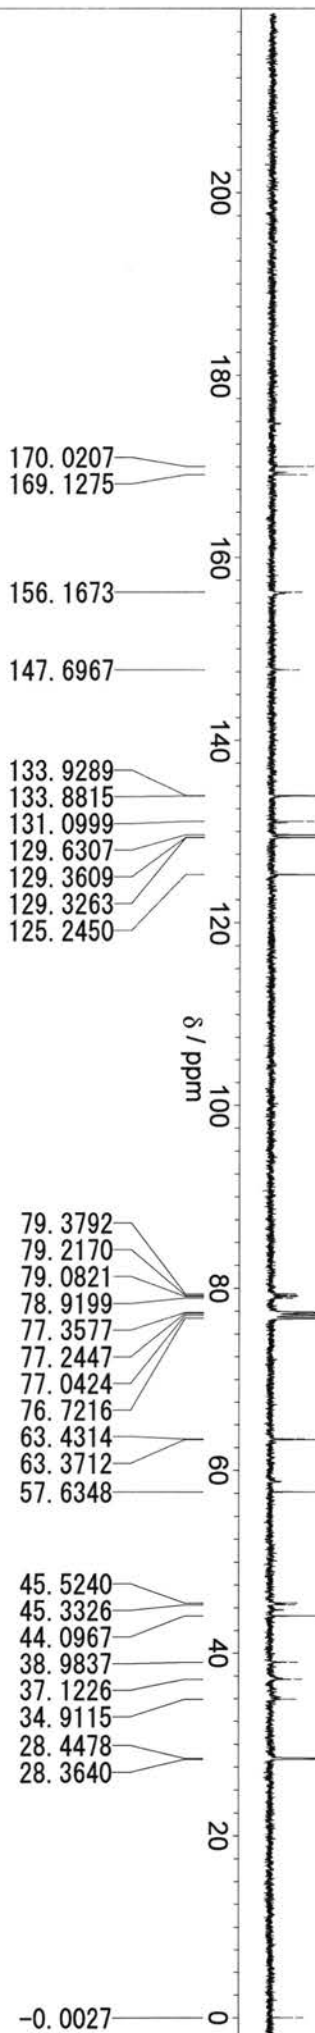

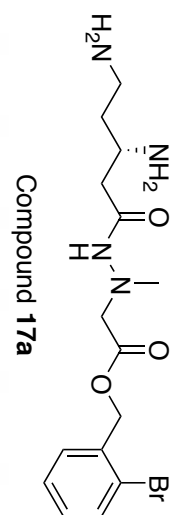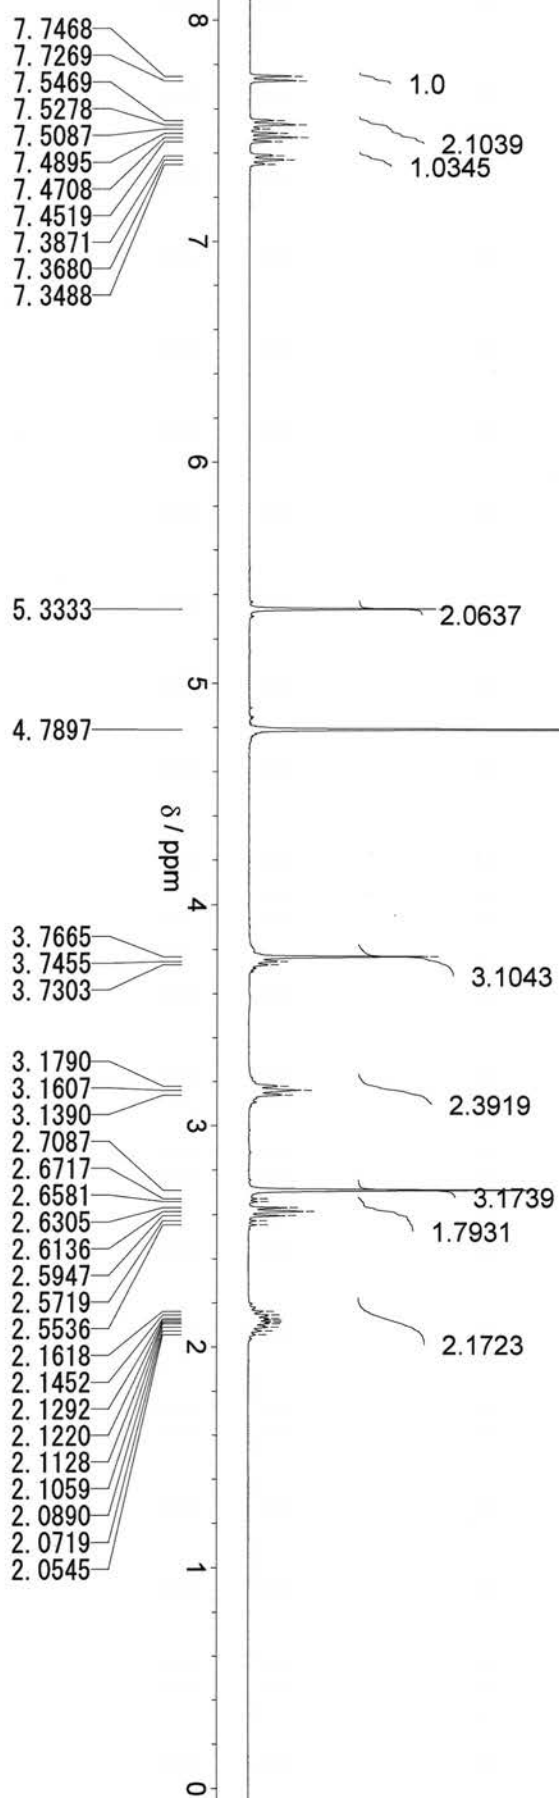

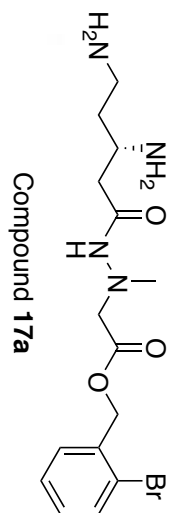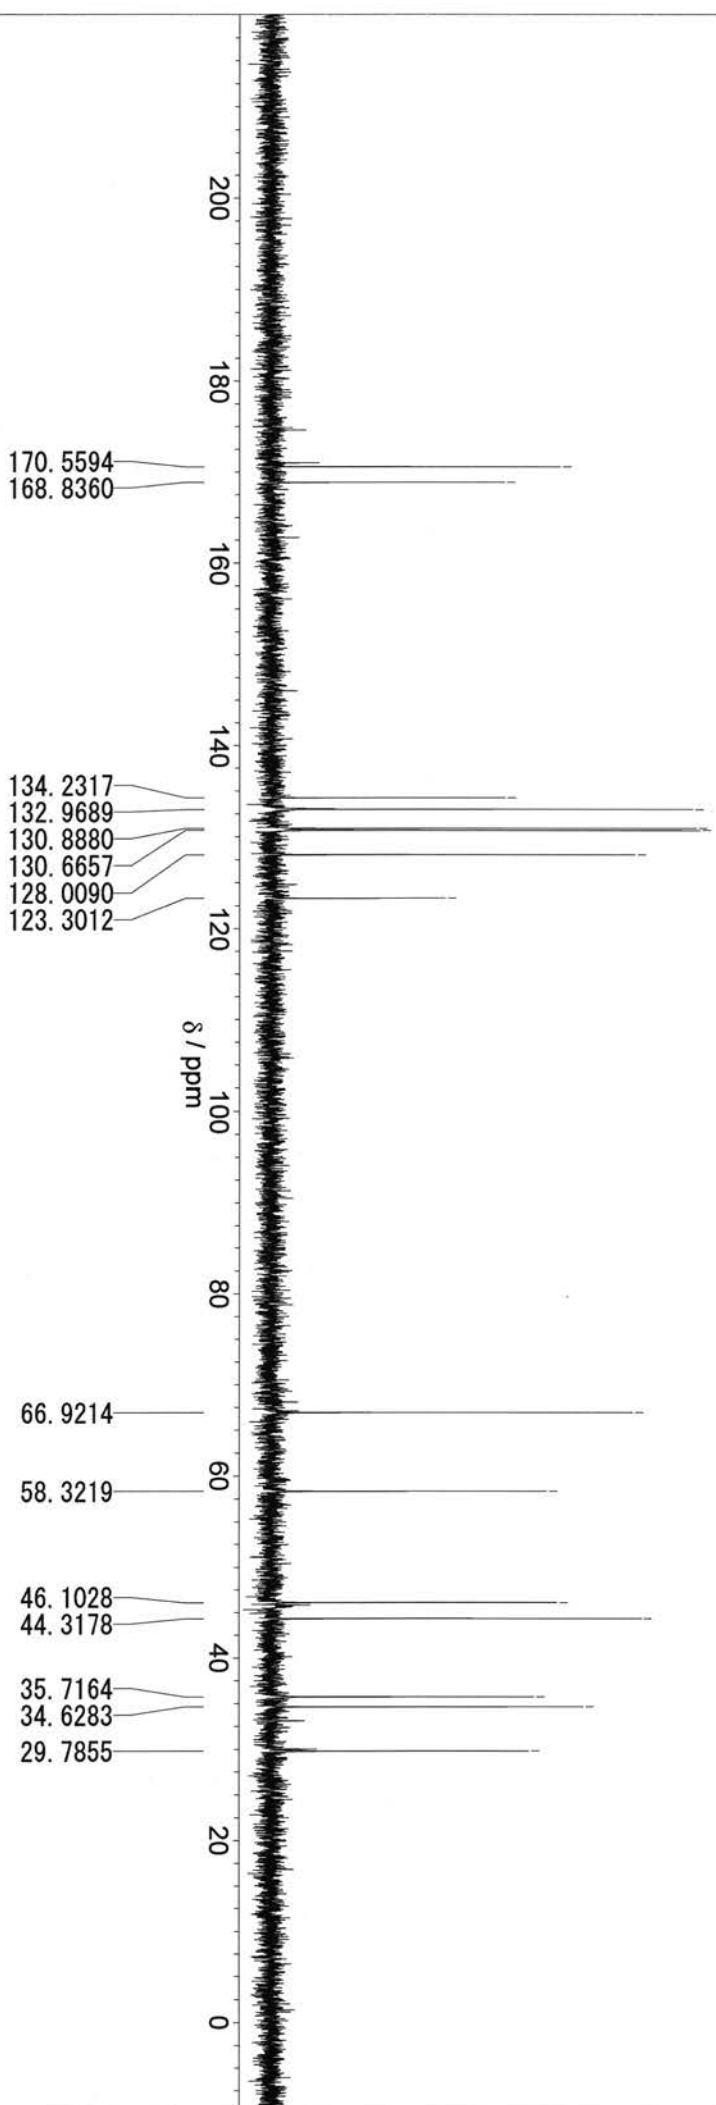

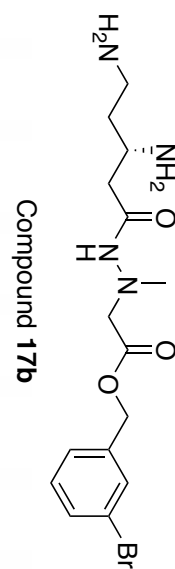

7.6375  
7.6040  
7.5844  
7.4201  
7.4008  
7.3771  
7.3577  
7.3384

1.8324

1.9613

5.1991

2.0

4.7902

3.7109

3.6946

3.6786

2.8799

3.1238

3.1050

3.0841

2.6721

2.2352

2.6653

2.6040

2.5902

3.0037

2.5626

2.5496

1.7422

2.5323

2.5091

2.4911

2.0085

2.1065

2.0897

2.0837

2.0726

2.0666

2.0546

2.0491

2.0370

2.0309

2.0136

1.9964

 $\delta$  / ppm

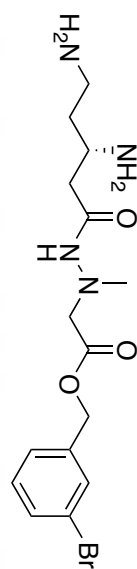

Compound 17b

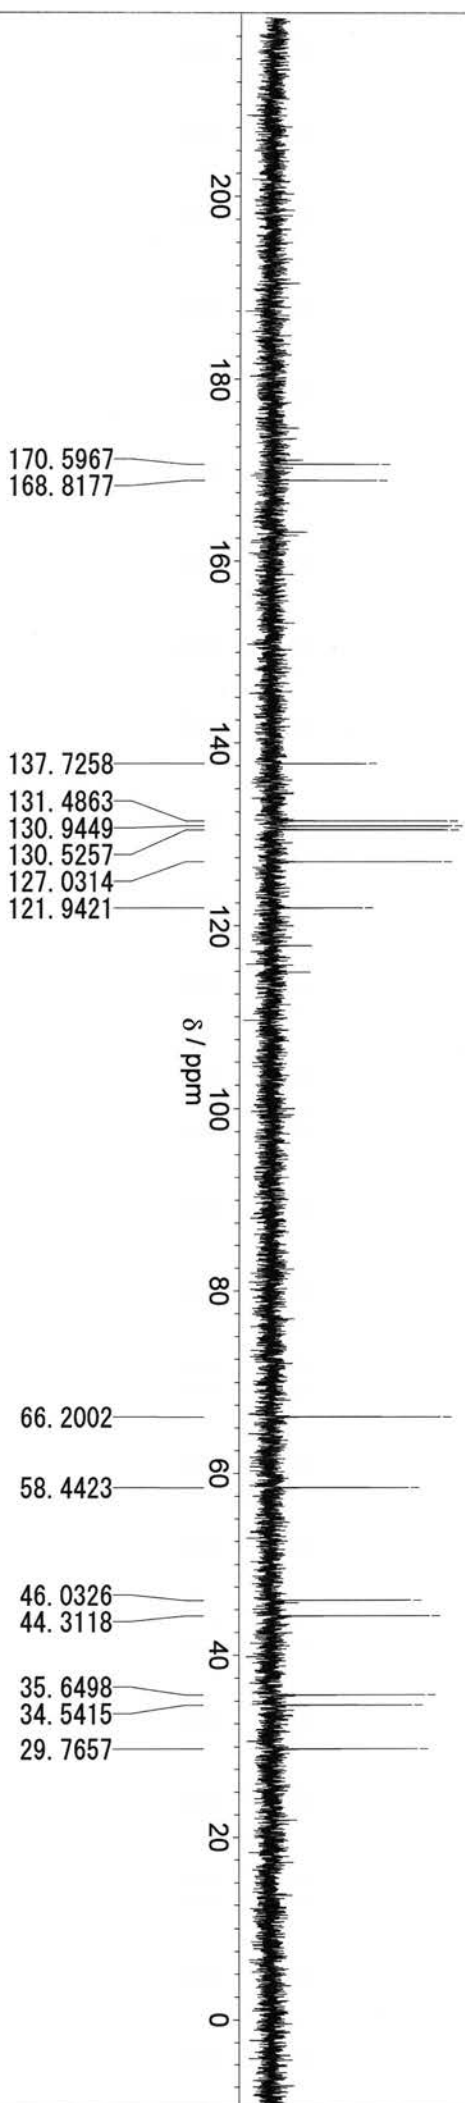



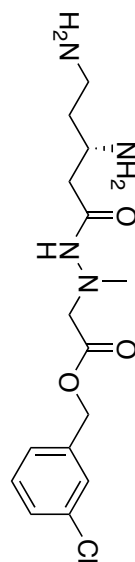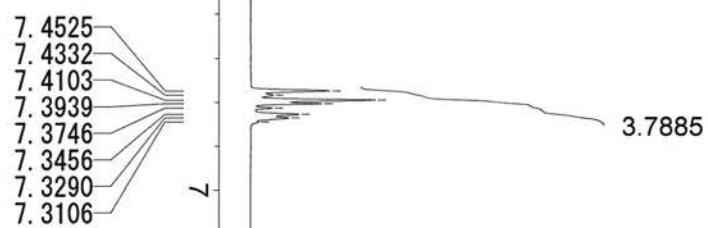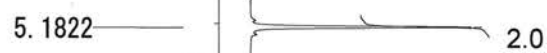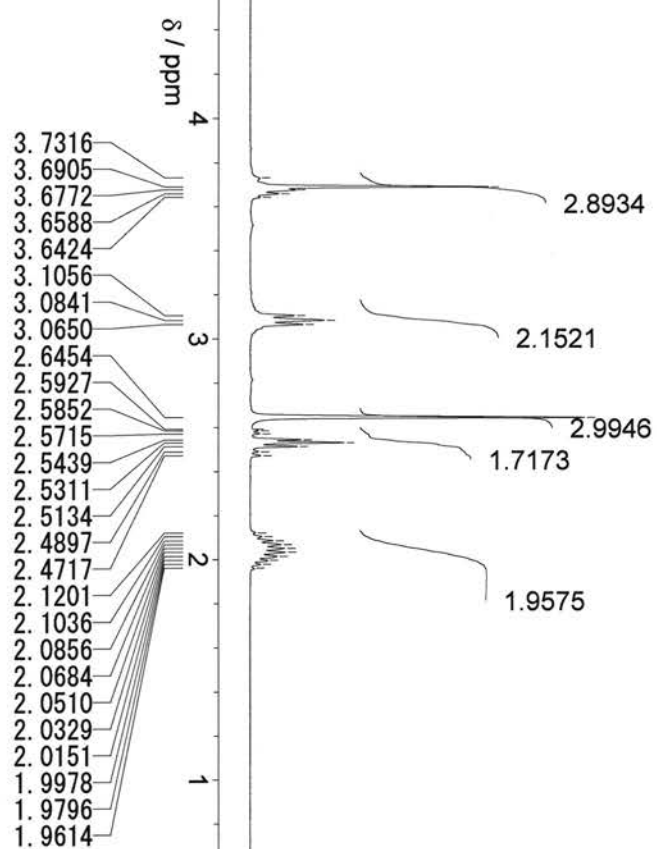

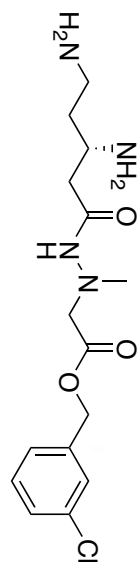

Compound 17e

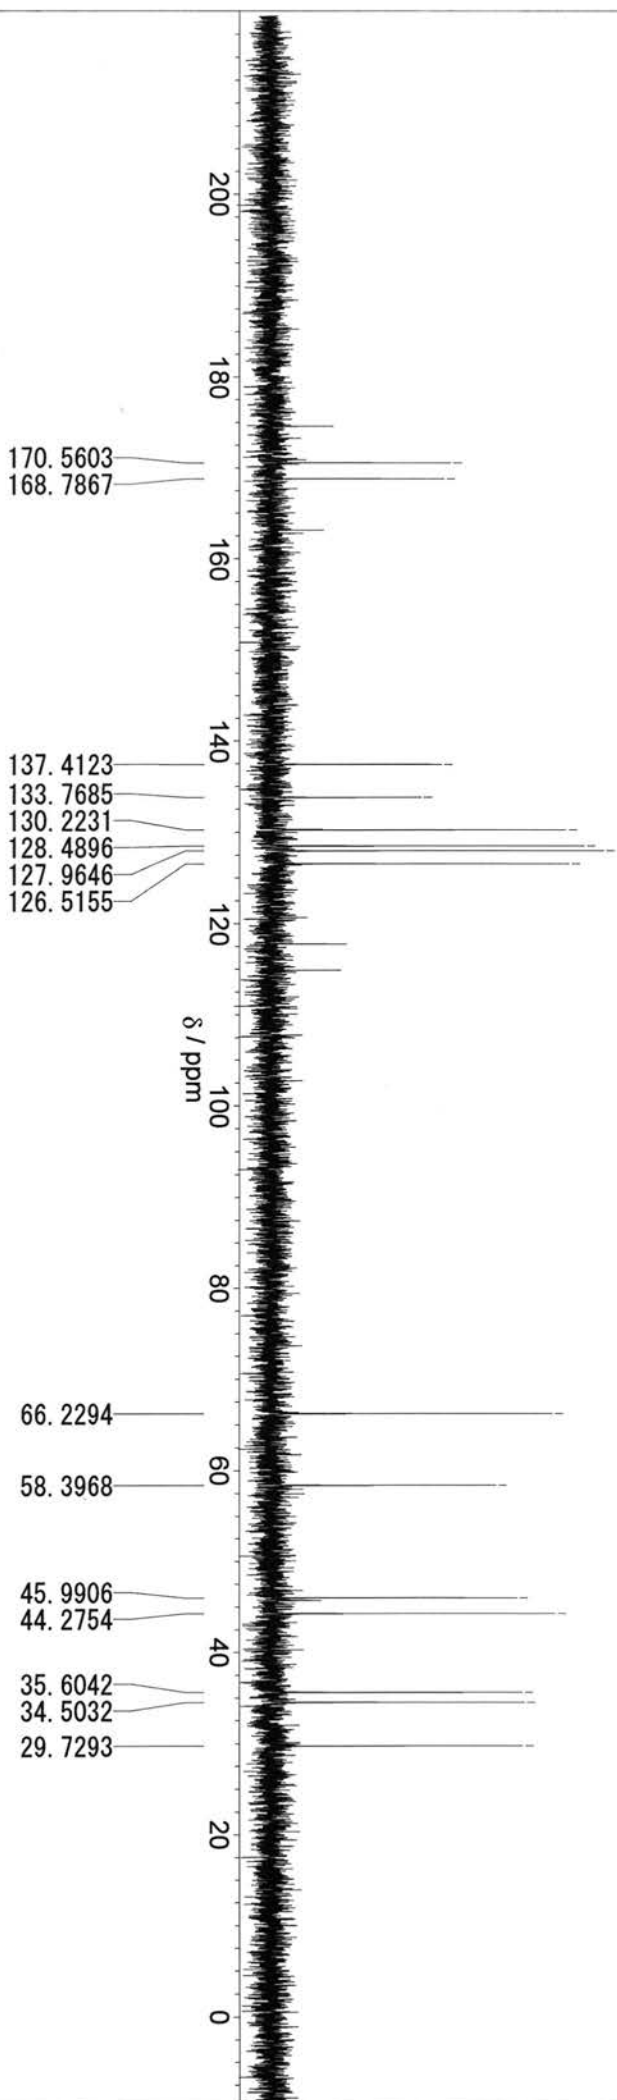

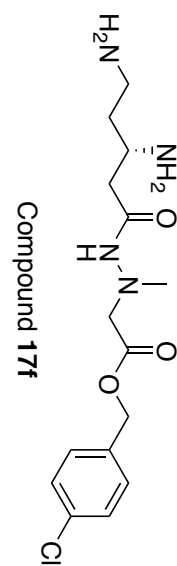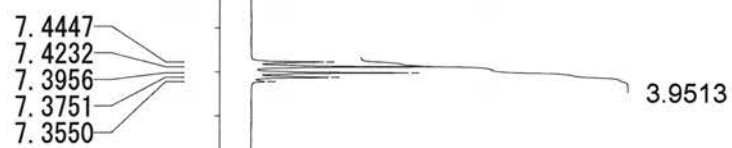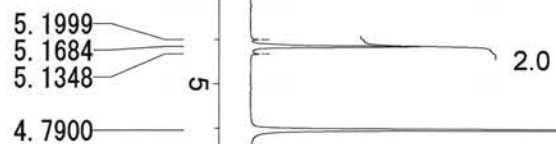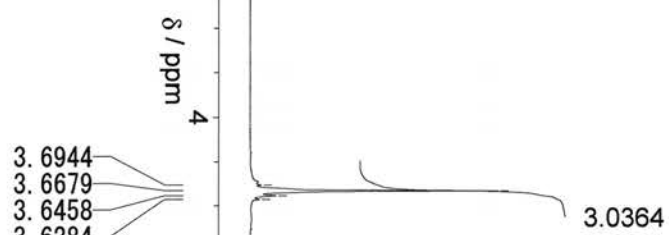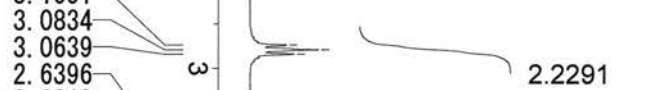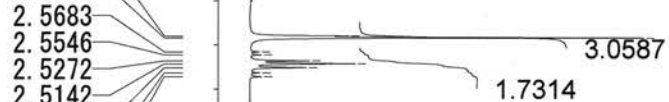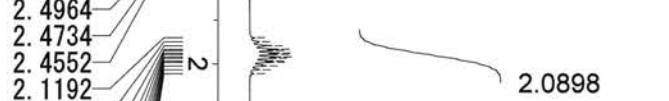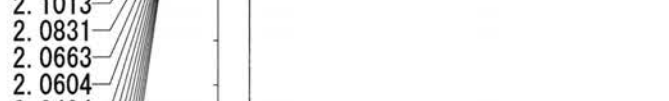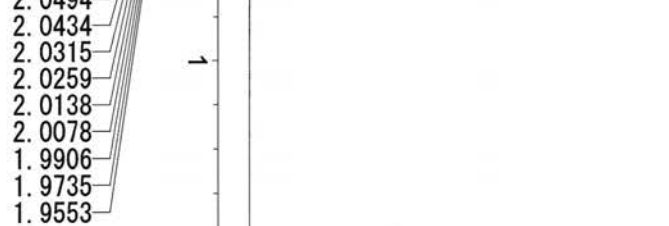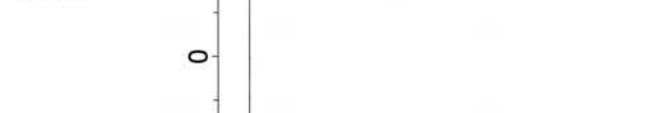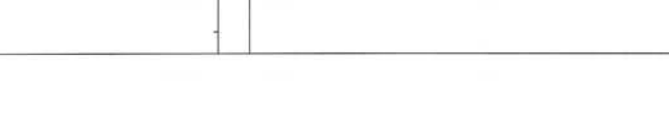

- 7.4447  
7.4232  
7.3956  
7.3751  
7.3550
- 5.1999  
5.1684  
5.1348
- 4.7900
- 3.6944  
3.6679  
3.6458  
3.6284  
3.1051  
3.0834  
3.0639
- 2.6396  
2.6318  
2.5683  
2.5546  
2.5272  
2.5142  
2.4964  
2.4734  
2.4552  
2.1192  
2.1013  
2.0831  
2.0663  
2.0604  
2.0494  
2.0434  
2.0315  
2.0259  
2.0138  
2.0078  
1.9906  
1.9735  
1.9553

δ / ppm

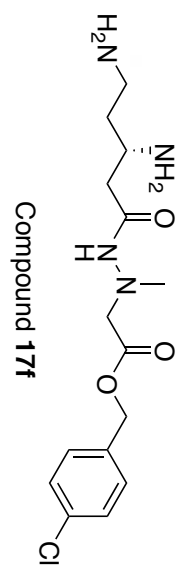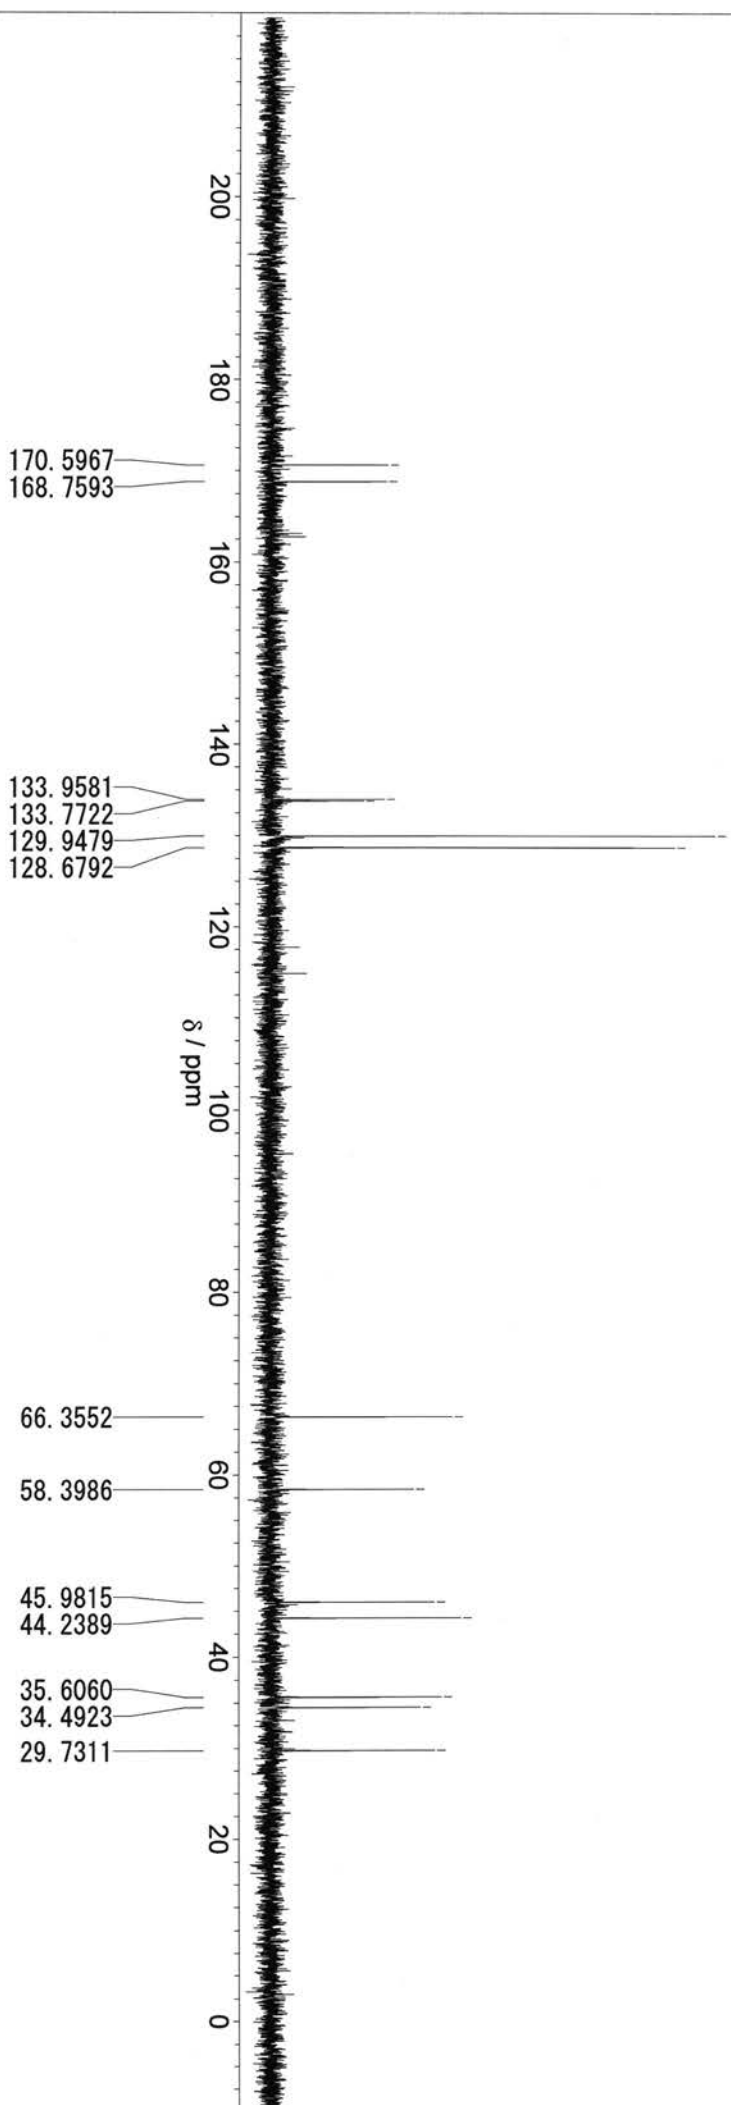

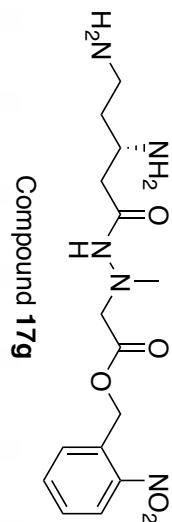

8.1585  
8.1401  
7.7726  
7.7537  
7.7373  
7.6540  
7.6344  
7.6244  
7.6035  
7.5853

1.0393  
1.0906  
2.252

5.5229  
2.0

4.7900

3.7527  
3.7350  
3.7187  
3.7046  
3.6869

3.1903

3.1271  
3.1078  
3.0881

2.3255

2.6495  
2.6336  
2.6057

3.7368

2.5922  
2.5797  
2.5614

1.7399

2.5385  
2.5201

2.3545

2.1231  
2.1054  
2.0886

2.0829  
2.0624  
2.0442

2.0387  
2.0213  
2.0042

δ / ppm

0

1

2

3

4

5

6

7

8

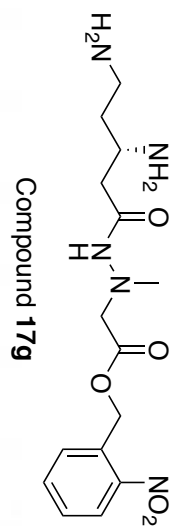

173.3363  
171.8636

150.2549

137.4001  
133.3412  
133.2701  
132.6340  
128.1650

66.9768

61.1664

48.9768  
47.2053

38.6026  
37.5965  
32.7284

0.0000

$\delta$  / ppm

## 8. References

- (1) Taguchi, A.; Hamada, K.; Kotake, M.; Shiozuka, M.; Nakaminami, H.; Pillaiyar, T.; Takayama, K.; Yakushiji, F.; Noguchi, N.; Usui, T.; Matsuda, R.; Hayashi, Y. Discovery of natural products possessing selective eukaryotic readthrough activity: 3-*epi*-deoxynegamycin and its leucine adduct. *ChemMedChem*. **2014**, *9*, 2233-2237.
- (2) Hayashi, Y.; Regnier, T.; Nishiguchi, S.; Sydnes, M. O.; Hashimoto, D.; Hasegawa, J.; Katoh, T.; Kajimoto, T.; Shiozuka, M.; Matsuda, R.; Node, M.; Kiso, Y. Efficient total synthesis of (+)-negamycin, a potential chemotherapeutic agent for genetic diseases. *Chem. Commun.* **2008**, 2379-2381.
